# Supplementary material for: Preadmission use of benzodiazepines and stroke outcomes: the Biostroke prospective cohort study
Source: PubMed Central journal article supplement — BMJ Open. 2019 Jan 15;9(1):e022720. doi: 10.1136/bmjopen-2018-022720 (PMC6340422; doi:10.1136/bmjopen-2018-022720), 2019-01-15
Supplement: bmjopen-2018-022720.draft_revisions.pdf [file bmjopen-2018-022720.draft_revisions.pdf]

# BMJ Open

BMJ Open is committed to open peer review. As part of this commitment we make the peer review history of every article we publish publicly available.

When an article is published we post the peer reviewers' comments and the authors' responses online. We also post the versions of the paper that were used during peer review. These are the versions that the peer review comments apply to.

The versions of the paper that follow are the versions that were submitted during the peer review process. They are not the versions of record or the final published versions. They should not be cited or distributed as the published version of this manuscript.

BMJ Open is an open access journal and the full, final, typeset and author-corrected version of record of the manuscript is available on our site with no access controls, subscription charges or pay-per-view fees (<http://bmjopen.bmj.com>).

If you have any questions on BMJ Open's open peer review process please email [info.bmjopen@bmj.com](mailto:info.bmjopen@bmj.com)

# BMJ Open

## Preadmission use of benzodiazepines is associated with increased post-stroke mortality.

|                               |                                                                                                                                                                                                                                                                                                                                                                                                                                                                                                                                                                                                                                                                                                                                                                                                                                                                                                                                                                                                                                                                                                                                                                                                                                                   |
|-------------------------------|---------------------------------------------------------------------------------------------------------------------------------------------------------------------------------------------------------------------------------------------------------------------------------------------------------------------------------------------------------------------------------------------------------------------------------------------------------------------------------------------------------------------------------------------------------------------------------------------------------------------------------------------------------------------------------------------------------------------------------------------------------------------------------------------------------------------------------------------------------------------------------------------------------------------------------------------------------------------------------------------------------------------------------------------------------------------------------------------------------------------------------------------------------------------------------------------------------------------------------------------------|
| Journal:                      | <i>BMJ Open</i>                                                                                                                                                                                                                                                                                                                                                                                                                                                                                                                                                                                                                                                                                                                                                                                                                                                                                                                                                                                                                                                                                                                                                                                                                                   |
| Manuscript ID                 | bmjopen-2018-022720                                                                                                                                                                                                                                                                                                                                                                                                                                                                                                                                                                                                                                                                                                                                                                                                                                                                                                                                                                                                                                                                                                                                                                                                                               |
| Article Type:                 | Research                                                                                                                                                                                                                                                                                                                                                                                                                                                                                                                                                                                                                                                                                                                                                                                                                                                                                                                                                                                                                                                                                                                                                                                                                                          |
| Date Submitted by the Author: | 08-Mar-2018                                                                                                                                                                                                                                                                                                                                                                                                                                                                                                                                                                                                                                                                                                                                                                                                                                                                                                                                                                                                                                                                                                                                                                                                                                       |
| Complete List of Authors:     | <p>Colin, Olivier; Centre Hospitalier Universitaire de Poitiers; Univ Lille; Inserm ; CHU Lille ; UMR-S 1171 "Degenerative and Vascular Cognitive Disorders", F59000-Lille, France.</p> <p>Labreuche, Julien; Univ Lille; Inserm ; CHU Lille ; EA2694, F59000-Lille, France.</p> <p>Deguil, Julie; Univ Lille; Inserm ; CHU Lille ; UMR-S 1171 "Degenerative and Vascular Cognitive Disorders", F59000-Lille, France.</p> <p>Mendyk, Anne Marie ; Univ Lille; Inserm ; CHU Lille ; UMR-S 1171 "Degenerative and Vascular Cognitive Disorders", F59000-Lille, France.</p> <p>Deken , Valerie; Univ Lille; Inserm ; CHU Lille ; EA2694, F59000-Lille, France.</p> <p>Cordonnier, Charlotte; Univ Lille; Inserm ; CHU Lille ; UMR-S 1171 "Degenerative and Vascular Cognitive Disorders", F59000-Lille, France.</p> <p>Deplanque, Dominique; Univ Lille; Inserm ; CHU Lille ; UMR-S 1171 "Degenerative and Vascular Cognitive Disorders", F59000-Lille, France.</p> <p>Leys, Didier; Univ Lille; Inserm ; CHU Lille ; UMR-S 1171 "Degenerative and Vascular Cognitive Disorders", F59000-Lille, France.</p> <p>Bordet, Régis; Univ Lille; Inserm ; CHU Lille ; UMR-S 1171 "Degenerative and Vascular Cognitive Disorders", F59000-Lille, France.</p> |
| Keywords:                     | Stroke < NEUROLOGY, mortality, benzodiazepines                                                                                                                                                                                                                                                                                                                                                                                                                                                                                                                                                                                                                                                                                                                                                                                                                                                                                                                                                                                                                                                                                                                                                                                                    |

SCHOLARONE™  
Manuscripts

1  
2  
3 **Preadmission use of benzodiazepines is associated with increased post-stroke mortality.**  
4  
5

6 Olivier Colin, MD<sup>1,2</sup>; Julien Labreuche, MD<sup>3</sup>; Julie Deguil, PhD<sup>1</sup>; Anne-Marie Mendyk<sup>1</sup>;  
7  
8 Valérie Deken<sup>3</sup>; Charlotte Cordonnier, MD, PhD<sup>1</sup>; Dominique Deplanque MD, PhD<sup>1</sup>; Didier  
9  
10 Leys MD, PhD<sup>1</sup>, Régis Bordet MD, PhD<sup>1</sup>.  
11  
12

- 13  
14 1. Univ Lille; Inserm ; CHU Lille ; UMR-S 1171 “Degenerative and Vascular Cognitive  
15 Disorders”, F59000-Lille, France.  
16  
17 2. Centre Hospitalier Universitaire de Poitiers, Neurology Unit, CS90577, 86021,  
18 Poitiers Cedex, France  
19  
20 3. Univ Lille; Inserm ; CHU Lille ; EA2694, F59000-Lille, France.  
21  
22  
23  
24  
25

26 Corresponding author: Olivier Colin, Centre Hospitalier Universitaire de Poitiers,  
27 Neurology Unit, CS90577, 86021, Poitiers Cedex, France; 00335494446, fax:  
28 0033549443856, e-mail : [oliviercolin2009@gmail.com](mailto:oliviercolin2009@gmail.com)  
29  
30  
31  
32  
33

34 Cover title: benzodiazepines and post-stroke mortality.  
35  
36

37 List of tables:  
38  
39

40 Table 1. Comparison of baseline characteristics between benzodiazepine users and non-users;  
41  
42

43 Table 2. Outcomes at 8-day and 90-day after stroke according to prior benzodiazepine use.  
44  
45

46 Key words: benzodiazepines; stroke; mortality.  
47  
48

49 Subject terms: stroke : ischemic stroke ; quality and outcomes: mortality/survival;  
50 epidemiology, lifestyle, and prevention: risk factors.  
51  
52  
53  
54  
55  
56  
57  
58  
59  
60

## ABSTRACT.

**Background and aims.** We tested the hypothesis that stroke outcomes in patients with preadmission use of benzodiazepine are worse.

**Method.** In a prospective cohort study, we recruited patients with acute ischemic stroke. Mortality, functional outcomes and cognition were evaluated at 8 and 90 days after stroke.

**Results.** 370 patients were included. 62 (18.5%) of 336 remainder patients were treated with benzodiazepines when stroke occurred, and they did not receive any other psychotropic drug. There was no difference at 8-day. Benzodiazepines users had a higher mortality rate at 3 months (25.9% vs 8.1%,  $p=0.0001$ ). After adjustment on baseline characteristics using a propensity score approach, the increase in 90-day mortality rate in benzodiazepines users remained significant, with an adjusted odds ratio (OR) of 3.24 (95% confidence interval [CI] 1.42 to 7.35). Benzodiazepines users didn't have a poorer functional outcome defined by a mRS  $\geq 2$  at 90 days (adjusted OR 1.70, 95%CI, 0.91 to 3.18) or a BI  $< 95$  (adjusted OR 1.17, 95%CI, 0.56 to 2.43). In survivors at 90 days, there was no significant difference in cognitive evaluations between benzodiazepine users and non users (adjusted OR 0.93, 95% CI, 0.31 to 2.76).

**Conclusion:** Our study had shown that preadmission use of benzodiazepines is associated with increased post-stroke mortality at 90 days, after adjustment on the main predictors of outcome. This finding does not support a putative neuroprotective effect of GABA<sub>A</sub> receptors agonists and should alert clinicians of their potential risks. (clinicaltrials.gov: NCT00763217)

## STRENGTHS AND LIMITATIONS OF THIS STUDY

- This cohort study have a great potential with regards to public health in the field of stroke mortality, as benzodiazepines are one of the most prescribed drugs in the world.
- These results are consistent with those from the literature of a non neuroprotective effect of benzodiazepines.
- These results might be confounded by indication bias (between benzodiazepines users and non-users) but the use of a propensity score partially addresses this concern.
- There is a lack of consistency of results for mortality and functional outcomes of stroke, suggesting new experimental approaches, to provide and appropriate mechanistic explanation.

## INTRODUCTION.

Knowledge of new factors that affect ischemic stroke prognosis is necessary for clinicians. Excessive chronic ethanol consumption is associated with higher stroke severity.<sup>1</sup> Ethanol and benzodiazepines share several central effects, especially on activation of inhibitory  $\gamma$  amino-butyric acid<sub>A</sub> (GABA<sub>A</sub>) receptors in the brain. Because of their good efficacy and rapidity of action, benzodiazepines are one of the most prescribed drugs, widely used for anxiety and insomnia. Interestingly, the impact of preadmission benzodiazepines use in stroke had never been evaluated as stroke is emerging as a leading cause of preventable death and disability worldwide. The objective of our study was so to investigate the effect of preadmission use of benzodiazepine usage on stroke outcome.

## METHODS.

### Patient and public involvement statement.

Patients with ischemic stroke admitted to our university hospital's stroke unit within 48 hours of symptom onset were recruited in the prospective “Biostroke” cohort (clinicaltrials.gov: number NCT00763217).<sup>1</sup> The local independent ethical committee approved the study. Patients were managed according to local rules without any investigation or treatment specifically performed. Patients or close relatives gave a signed informed consent.

### Data collection and clinical outcomes definition.

All patients underwent an initial standardized evaluation, including their medical history) and vascular risk factors (using a structured questionnaire), a physical examination, a routine blood biochemistry screen, and diagnostic testing. At admission patients underwent either CT scan or an MRI scan.

Patients had a follow-up examination 8 and 90 days after admission. The modified Rankin scale (mRS), the Barthel index (BI), the Mini Mental State Examination (MMSE), and all-cause mortality were recorded. A National Institutes of Health Stroke Scale (NIHSS) score  $\geq 6$  was considered as a severe clinical impairment. A mRS score  $\geq 2$  (poor functional outcome), an BI score  $< 95$  (poor functional outcome), and a MMSE score  $< 24$  (cognitive impairment) were considered as the worst possible stroke outcomes.<sup>2</sup> We also analysed the association between benzodiazepine use and respiratory failure and pneumonia at the acute phase of stroke.

### Preadmission use of GABA receptors agonists.

1  
2  
3 Drug exposition was defined by benzodiazepine drugs administered orally for more  
4 than fifteen days before stroke regardless of length of treatment period and dosage of  
5 treatment. Hypnotic drugs were also included, since they acts on similar receptors to the  
6 benzodiazepines. Patients with concomitant use of other psychoactive drugs were excluded,  
7 because of their possible confounding effects.  
8  
9  
10  
11  
12

### 13 14 15 Statistical analysis.

16  
17  
18 Quantitative variables are expressed as mean (standard deviation) in case of normal  
19 distribution or median (interquartile range) otherwise. Qualitative variables are expressed as  
20 numbers (percentage). Normality of distributions were assessed using histograms and  
21 Shapiro-Wilk test. Bivariate comparisons between benzodiazepine users and non-users were  
22 performed using Student's t test for quantitative variables (Mann-Whitney U test was used for  
23 non-Gaussian distribution) and Chi-squared test (Fisher's exact test was used when the  
24 expected cell frequency was <5) for categorical variables. Comparisons in clinical outcomes  
25 at 8 and 90 days (all-cause mortality, NIHSS  $\geq 6$ , mRS  $\geq 2$ , BI < 95 and MMSE < 24) were  
26 further adjusted for baseline between-group differences by including propensity score as a  
27 covariate into a logistic regression model. We derived from logistic regression model adjusted  
28 for propensity score, adjusted odds ratio (OR) with their 95% confidence interval (CI) as  
29 effect size measure. Propensity score was estimated using a non-parsimonious multivariable  
30 logistic regression model, with benzodiazepine use as the dependent variable and all  
31 characteristics associated with benzodiazepine exposure in bivariate analysis ( $p < 0.20$ ) as  
32 independent variables. To avoid case deletion in propensity score due to missing information  
33 for independent variables ( $n=38$ ), missing values on independent variables (range, 0% to  
34 7.1%) were imputed by multiple imputation using regression switching approach (chained  
35 equations, with  $n=20$  imputations) with predictive mean matching method for continuous  
36  
37  
38  
39  
40  
41  
42  
43  
44  
45  
46  
47  
48  
49  
50  
51  
52  
53  
54  
55  
56  
57  
58  
59  
60



1  
2  
3 variables, and logistic regression model for binary variables.<sup>3</sup> The covariates used to generate  
4  
5 the multiple imputed data sets (using the R statistical software version 3.03) were all variables  
6  
7 listed in table 1. Since the rate of missing data was high for 8- and 90 day MMSE (27% and  
8  
9 24%, respectively), we performed sensitivity analysis by also using multiple imputation  
10  
11 approach to handle missing values. Statistical testing was done at the two-tailed  $\alpha$  level of  
12  
13 0.05. Data were analyzed using SAS software (version 9.3, SAS Institute Inc., Cary, NC,  
14  
15 USA).  
16  
17  
18  
19  
20  
21  
22  
23  
24  
25  
26  
27  
28  
29  
30  
31  
32  
33  
34  
35  
36  
37  
38  
39  
40  
41  
42  
43  
44  
45  
46  
47  
48  
49  
50  
51  
52  
53  
54  
55  
56  
57  
58  
59  
60

## RESULTS

Among the 370 patients included in the Biostroke study, 34 patients (mean age, 69.0±13.7; 14 men) were excluded because of concomitant use of other psychoactive drugs. In the 336 remainders, 62 (18.5%) were under benzodiazepines when stroke occurred. The baseline characteristics of the study population are described in Table 1. Benzodiazepine users were older (73.1±12.6 *versus* 65.4±15.0,  $p=0.0002$ ), more likely to be women (62.9 *versus* 42.7%,  $p=0.004$ ) and to have arterial hypertension (77.4% *versus* 56.6%,  $p=0.002$ ), lower BMI (25.6±4.8 *versus* 27.0±4.9,  $p=0.042$ ) and lower levels of alanine aminotransferase (18 (14-23) *versus* 21 (15-29),  $p=0.029$ ) than benzodiazepine users.

Twenty patients were lost to follow-up between day 8 and day 90 (see supplemental table 1 for their main characteristics). Death occurred in 11 patients (3.3%) patients at day-8 and 36 (11.4%) at day-90. The mortality rate was significantly higher in benzodiazepines users than non-users at day-8 and day-90 (table 2). After adjustment on baseline differences using a propensity score approach, the increase in mortality risk for benzodiazepines users remained significant at 90 day, with an adjusted OR of 3.24 (95%CI 1.42 to 7.34).

A higher rate of poor functional outcome at day-8 defined by mRS $\geq$ 2 or by the BI<95 was found in benzodiazepines users (table 2). A similar between-group difference was found for mRS  $\geq$ 2 at 90-day. However, after adjustment, the difference in poor functional outcomes was not significant.

In survivors at day-8 or at day-90, there was no significant difference in MMSE. When the analyses were repeated after handling the missing data on MMSE by using multiple imputation approach (see supplemental tables 2 for main baseline characteristics in patients with and without missing values), similar non-significant differences were found : the adjusted OR (95%CI) was 0.56 (0.23-1.32) for 8-day MMSE<24 and 0.93 (0.31-2.76) for 90-

1  
2  
3 day MMSE<24.

4  
5           Regarding respiratory failure or pneumonia at 8 day, benzodiazepines users have a  
6  
7 similar early respiratory complications risk than non-users (12.9% (n=8) vs. 17.5% (n=48),  
8  
9  $p=0.73$ ).

10  
11  
12  
13  
14  
15  
16  
17  
18  
19  
20  
21  
22  
23  
24  
25  
26  
27  
28  
29  
30  
31  
32  
33  
34  
35  
36  
37  
38  
39  
40  
41  
42  
43  
44  
45  
46  
47  
48  
49  
50  
51  
52  
53  
54  
55  
56  
57  
58  
59  
60

For peer review only

## DISCUSSION

Users of benzodiazepines had a higher risk of death 90 days after stroke but benzodiazepine use was not associated with worse functional outcome.

### **Mortality and benzodiazepines.**

GABA receptor agonists have been first considered as a type of neuroprotective agent in reducing infarct size and improving functional outcome in animal models of cerebral ischaemia.<sup>4,5</sup> However, in humans, a recent review does not provide the evidence to support the use of GABA receptor agonists for the treatment of patients with acute ischaemic stroke.<sup>6</sup> Randomized controlled trials (RCTs) investigating GABA receptor agonists versus placebo for acute stroke patients with the outcomes of death or dependency and functional independence were included. These RCTs measured death and dependency at three months in clomethiazole versus placebo or between diazepam and placebo without significant difference. In a recent non-randomized comparison, treatment with benzodiazepines after ischaemic stroke had no independent impact on stroke outcome and mortality at 90-day.<sup>7</sup> However, these data were registered in a trials archive and were not derived from prospective trials, with indication bias and many confounders. In our prospective study, current users of benzodiazepines have a higher rate of post-stroke mortality at 90-day. Effect of benzodiazepine drugs on mortality is still debated, but these results are consistent with those from the literature. In a large cohort of patients attending primary care, GABA<sub>A</sub> receptors agonists were associated with significantly increased risk of mortality.<sup>8</sup> In two other representative databases, a significant while moderate increase in all-cause mortality in relation to benzodiazepines was found, in a population of incident and mostly occasional

1  
2  
3 users.<sup>9</sup> A recent population-wide register-based study identified that benzodiazepines are  
4  
5 more frequently used in patients with strokes than in controls and are associated with greater  
6  
7 all-cause mortality in patients with stroke and matched controls.<sup>10</sup> The use of anti-anxiety  
8  
9 medication and mortality risk in patients following myocardial has also been studied in a  
10  
11 sampling database.<sup>11</sup> Sudden death was significantly associated with increased  
12  
13 benzodiazepam dosage during approximately five years. For patients receiving higher doses  
14  
15 of daily benzodiazepines, protective effects for cardiac mortality and heart failure  
16  
17 hospitalization decreased and a J-curve dose-response relationship was seen, without  
18  
19 providing an adequate mechanistic explanation. As with all observational findings, these  
20  
21 results are prone to bias arising from unmeasured and residual confounding. In our study,  
22  
23 there was no association between mortality and poor functional outcome. For the deaths,  
24  
25 information about the underlying cause was unfortunately not obtained, but was not  
26  
27 associated with stroke severity. Benzodiazepines have been shown to increase the occurrence  
28  
29 of community-acquired pneumonia,<sup>12</sup> due to their pharmacodynamics properties. In our  
30  
31 cohort, prior use of benzodiazepines didn't increase the incidence of respiratory depression,  
32  
33 and cannot explain the excess mortality in these patients. Although the causes of death can't  
34  
35 be explained, our stroke data base was prospectively collected and the study was carried out  
36  
37 in a representative cohort of routine clinical stroke patients with an exhaustive drug history  
38  
39 analysis. Many follow up data were available which allow adjustment on a large number of  
40  
41 potential confounders of the benzodiazepine effects and mortality. Although, our results  
42  
43 might be confounded by indication bias; the use of a propensity score partially addresses this  
44  
45 concern, but benzodiazepine users could be different from non-users (unmeasured baseline  
46  
47 variables).  
48  
49  
50  
51  
52  
53  
54  
55  
56  
57  
58  
59  
60

### **Cognition and benzodiazepines.**

Benzodiazepine use was neither associated with cognitive impairment at 8 days or 90 days. However, the short term effects of benzodiazepines on impairment cognition are well known and use of benzodiazepines is also associated with increased risk of dementia, even if the nature of the link between benzodiazepines and Alzheimer's disease remains unclear.<sup>13</sup> In our cohort, GABA receptor agonists treatment before stroke didn't show cognitive impairment as assessed by MMSE, in these elderly patients without dementia, but a longer follow-up period may be useful. Further, although we use methods to impute for missing data, data are missing on follow-up - loss to follow-up in a set, and then lack of doing MMSE on follow-up in another set (post-stroke aphasia) - which are likely not missing at random.

### **Comorbid alcohol use disorder.**

Prior benzodiazepine use (regardless the dosage of treatment) was not associated with higher baseline stroke severity, as excessive chronic ethanol consumption was.<sup>1</sup> Benzodiazepine users were also less likely to be alcohol drinkers in our study, although the difference did not reach the significance level. So, the relationship between stroke severity and alcohol consumption could not be necessarily due to a link between GABA receptors and alcohol, but due to chronic effects of ethanol consumption on other organ systems.

### **Unanswered questions and implication for clinical practice.**

The lack of consistency of results for mortality and functional outcomes make this less

1  
2  
3 likely to explain a physiologic effect. Anyway, the increased rate of mortality after stroke  
4  
5 found in the benzodiazepines users group add to the increasing body of evidence concerning a  
6  
7 non-neuroprotective effect of GABA receptors agonists. Benzodiazepines reduce the cerebral  
8  
9 metabolic rate of oxygen and cerebral blood flow and can induce post-hypoxic  
10  
11 leukoencephalopathy.<sup>14,15</sup> As lack of blood flow leads to cerebral hypoxia, it results in a  
12  
13 cascade of biological events, which facilitates glutamate release. Based upon these data, we  
14  
15 hypothesized that chronic cerebral hypoxia could thus be induced by benzodiazepines use.  
16  
17 Short- and long-term modulation of GABAA receptors by benzodiazepines could modulate  
18  
19 ischaemia-induced glutamate release. Our findings generate a hypothesis that needs  
20  
21 confirmation. As an interventional study would not be feasible, this question can be answered  
22  
23 though experimental approaches in animals, to provide and appropriate mechanistic  
24  
25 explanation.  
26  
27  
28  
29  
30

31 This research should also not be used to condemn GABA receptors agonist drugs since  
32  
33 their short-term use can have an important role in the management of anxiety. This study  
34  
35 should however alert clinicians to the increased post-stroke mortality in benzodiazepine-users.  
36  
37 As patients could also be at high risk of recurrence after stroke, use of benzodiazepines should  
38  
39 be cautioned against.  
40  
41  
42  
43  
44  
45  
46  
47  
48  
49  
50  
51  
52  
53  
54  
55  
56  
57  
58  
59  
60

**CONCLUSION.**

Preadmission use of benzodiazepines was associated with a higher medium-term post-stroke mortality. Our findings do not support a putative neuroprotective effect of these drugs. Further large studies are warranted to confirm the association between benzodiazepines use and early post-stroke mortality.



**Table 1. Comparison of baseline characteristics between benzodiazepine users and non-users.**

|                                    | Benzodiazepine<br>non-users<br>(n=274) | Benzodiazepine<br>users<br>(n=62) | <i>P</i> |
|------------------------------------|----------------------------------------|-----------------------------------|----------|
| <b>Demographic characteristics</b> |                                        |                                   |          |
| Age, y, mean±SD                    | 65.4 ± 15.0                            | 73.1 ± 12.6                       | 0.0002   |
| Men                                | 157 (57.3)                             | 23 (37.1)                         | 0.004    |
| <b>Medical history</b>             |                                        |                                   |          |
| Previous stroke                    | 28 (10.3)                              | 7 (11.3)                          | 0.81     |
| Previous TIA                       | 20 (7.3)                               | 5 (8.1)                           | 0.79     |
| Coronary artery disease            | 52 (19.0)                              | 17 (27.4)                         | 0.14     |
| Sleep apnea syndrome               | 7 (2.6)                                | 2 (3.2)                           | 0.68     |
| Heart rhythm disorders             | 59 (21.6)                              | 20 (32.3)                         | 0.075    |
| <b>Vascular risk factors</b>       |                                        |                                   |          |
| Arterial hypertension              | 155 (56.6)                             | 48 (77.4)                         | 0.002    |
| Diabetes mellitus                  | 59 (21.5)                              | 7 (11.3)                          | 0.067    |
| Hypercholesterolemia               | 124 (45.3)                             | 34 (54.8)                         | 0.17     |
| Hypertriglyceridemia               | 41 (15.0)                              | 11 (17.7)                         | 0.58     |
| Smoking                            | 89 (32.5)                              | 13 (21.0)                         | 0.075    |
| Chronic ethanol consumption        | 45 (16.5)                              | 7 (11.5)                          | 0.33     |
| BMI, kg/m <sup>2</sup> , mean±SD   | 27.0 ± 4.9                             | 25.6 ± 4.8                        | 0.042    |
| <b>Routine drugs</b>               |                                        |                                   |          |
| Fibrates                           | 17 (6.2)                               | 6 (9.7)                           | 0.40     |
| Statins                            | 85 (31.0)                              | 22 (35.5)                         | 0.50     |
| Oral anticoagulants                | 17 (6.2)                               | 2 (3.2)                           | 0.54     |
| Antiplatelet                       | 98 (35.8)                              | 28 (45.2)                         | 0.17     |
| ACE                                | 47 (17.1)                              | 16 (25.8)                         | 0.12     |
| Angiotensin II receptor antagonist | 46 (16.8)                              | 10 (16.1)                         | 0.90     |

|                                                           |                  |                   |       |
|-----------------------------------------------------------|------------------|-------------------|-------|
| Diuretics                                                 | 65 (23.7)        | 21 (33.9)         | 0.098 |
| Calcium channel blockers                                  | 42 (15.3)        | 11 (17.7)         | 0.64  |
| Betablockers                                              | 98 (35.9)        | 29 (46.8)         | 0.11  |
| Oral hypoglycemic                                         | 45 (16.4)        | 6 (9.7)           | 0.18  |
| Intravenous thrombolysis                                  | 78 (28.9)        | 16 (25.8)         | 0.63  |
| Prehospital delay stroke, min, mean±SD                    | 141 ± 56         | 160 ± 51          | 0.22  |
| NIHSS ≥6                                                  | 142 (51.8)       | 34 (54.8)         | 0.67  |
| Biological characteristics                                |                  |                   |       |
| Triglycerides, g/L, median (IQR)                          | 1.06 (0.81-1.56) | 1.01 (0.84-1.56)  | 0.93  |
| Total cholesterol, g/L, mean±SD                           | 1.96 ± 0.49      | 1.92 ± 0.52       | 0.60  |
| HDL-cholesterol, g/L, mean±SD                             | 0.53 ± 0.17      | 0.54 ± 0.13       | 0.86  |
| LDL-cholesterol, g/L, mean±SD                             | 1.17 ± 0.41      | 1.14 ± 0.44       | 0.61  |
| Glycated hemoglobin, %, median (IQR)                      | 5.9 (5.6-6.5)    | 5.9 (5.7-6.3)     | 0.98  |
| Hemoglobin, g/dL, median (IQR)                            | 13.8 (12.9-14.9) | 13.5 (12.5-14.2)  | 0.077 |
| Leukocytes, /mm <sup>3</sup> , median (IQR)               | 8320 (6745-9865) | 8335 (6700-10680) | 0.55  |
| Neutrophils, /mm <sup>3</sup> , median (IQR)              | 5400 (4200-7400) | 5850 (4500-8150)  | 0.26  |
| Platelets, 1000/mm <sup>3</sup> , median (IQR)            | 235 (197-271)    | 234.5 (192-274)   | 0.88  |
| Prothrombin index, %, median (IQR)                        | 96 (88-100)      | 94 (86-100)       | 0.42  |
| Activated partial thromboplastin time, s,<br>median (IQR) | 32 (29-35)       | 32 (28-37)        | 0.52  |
| C-reactive protein, mg/L, median (IQR)                    | 4.7 (2.0-9.7)    | 5.5 (2.5-9.7)     | 0.65  |
| Aspartate aminotransferase, U/L, median (IQR)             | 23 (19-29)       | 23 (20-27)        | 0.88  |
| Alanine aminotransferase, U/L, median (IQR)               | 21 (15-29)       | 18 (14-23)        | 0.029 |

Data are expressed as number (%) unless otherwise indicated.

Abbreviations: ACE=angiotensin converting enzyme, BMI= body mass index, HDL= high density lipoprotein,

IQR=interquartile range, LDL=low density lipoprotein, NIHSS= National Institutes of Health Stroke Scale,

SD=standard deviation, TIA=transient ischemic attack.

**Table 2. Outcomes at 8-day and 90-day after stroke according to prior benzodiazepine use**

|                                 | Benzodiazepine users |              | <i>p</i> | OR (95% CI)*     | <i>p</i> * |
|---------------------------------|----------------------|--------------|----------|------------------|------------|
|                                 | No                   | Yes          |          |                  |            |
| <b>Outcome at 8-day</b>         | (n=274)              | (n=62)       |          |                  |            |
| All-cause death                 | 6/274 (2.2)          | 5/62 (8.1)   | 0.034    | 2.51 (0.67-9.32) | 0.17       |
| NIHSS $\geq 6$                  | 86/264 (32.58)       | 22/55 (40)   | 0.29     | 1.22 (0.64-2.33) | 0.54       |
| Poor outcome (mRS $\geq 2$ )    | 137/270 (50.7)       | 39/60 (65.0) | 0.045    | 1.55 (0.84-2.87) | 0.16       |
| Poor outcome (Barthel <95)      | 119/265 (44.9)       | 35/56 (62.5) | 0.017    | 1.78 (0.95-3.35) | 0.072      |
| Cognitive impairment (MMSE <24) | 52/196 (26.5)        | 11/40 (27.5) | 0.90     | 0.56 (0.23-1.32) | 0.18       |
| <b>Outcome at 90-day</b>        | (n=258)              | (n=58)       |          |                  |            |
| All-cause death                 | 21/258 (8.1)         | 15/58 (25.9) | 0.0001   | 3.24 (1.42-7.35) | 0.005      |
| Poor outcome (mRS $\geq 2$ )    | 110/258 (42.6)       | 35/58 (60.3) | 0.014    | 1.70 (0.91-3.18) | 0.096      |
| Poor outcome (Barthel <95)      | 72/235 (30.6)        | 16/43 (37.2) | 0.39     | 1.17 (0.56-2.43) | 0.68       |
| Cognitive impairment (MMSE <24) | 26/194 (13.4)        | 5/35 (14.3)  | 0.79     | 0.93 (0.31-2.76) | 0.90       |

Values are n/N (%) unless otherwise indicated. \* adjusted on propensity score.

Abbreviations: *MMSE*: Mini Mental State Examination, mRS: modified Rankin score, NIHSS: National Institutes of Health Stroke Scale, OR: odds ratio, CI: confidence interval.

## **SOURCES OF FUNDING.**

This study was funded by the French Ministry of Health (as part of the PHRC programme).

## **AUTHORS' CONTRIBUTIONS**

OC contributed to the analysis and drafting the manuscript. JL performed statistical analysis and contributed to drafting the manuscript. JD contributed to drafting the manuscript. AMM contributed to study design and data collection. VD contributed to statistical analysis and contributed to drafting the manuscript. CC contributed to study design and data collection. DD contributed to study design, data collection and analysis. DL contributed to study design, data collection and analysis. RB contributed to study design, data collection and analysis, and drafting the manuscript. All authors read and approved the final manuscript.

## **CONFLICTS OF INTEREST.**

The authors declare that they have no competing interests.

## **DATA SHARING STATEMENT**

No additional data are available.

**REFERENCES**

1. Ducroquet A, Leys D, Al Saabi A, Richard F, Cordonnier C, Girot Marie et al. Influence of chronic ethanol consumption on the neurological severity in patients with acute cerebral ischemia. *Stroke*. 2013;44:2324-6.
2. Deplanque D, Masse I, Lefebvre C, Libersa C, Leys D, Bordet R. Prior TIA, lipid-lowering drug use, and physical activity decrease ischemic stroke severity. *Neurology*. 2006;67:1403–1410.
3. Van Buuren S, Groothuis-Oudshoorn K. MICE:Multivariate Imputation by Chained Equations in R. *J Stat Softw*. 2011.
4. Marshall JW, Green AR, Ridley RM. Comparison of the neuroprotective effect of clomethiazole, AR-R15896AR and NXY-059 in a primate model of stroke using histological and behavioural measures. *Brain Research*. 2003;972:119-26.
5. Nelson RM, Green AR, Lambert DG, Hainsworth AH. On the regulation of ischemia-induced glutamate efflux from rat cortex by GABA: in vitro studies with GABA, clomethiazole and pentobarbitone. *British Journal of Pharmacology*. 2000;130:1124-30.
6. Liu J, Wang LN. Gamma aminobutyric acid (GABA) receptor agonists for acute stroke. *Cochrane Database Syst Rev*. 2014;8:CD009622.
7. Frank B, Fulton RL, Lees KR, Sanders RD, VISTA Collaborators. Impact of benzodiazepines on functional outcome and occurrence of pneumonia in stroke: evidence from VISTA. *Int J Stroke*. 2014;9:890-4.
8. Weich S, Pearce HL, Croft P, Singh S, Crome I, Bashford J. Effect of anxiolytic and hypnotic drug prescriptions on mortality hazards: retrospective cohort study. *BMJ*. 2014;348:g1996.

- 1  
2  
3 9. Palmaro A, Dupouy J, Lapeyre-Mestre ML. Benzodiazepines and risk of death: results  
4 from two large cohort studies in France and UK. *Eur Neuropsychopharmacol*.  
5 2015;25:1566-77.  
6  
7
- 8  
9 10. Jennum P, Baandrup L, Iversen HK, Ibsen R, Kjellberg J. Mortality and use of  
10 psychotropic medication in patients with stroke: a population-wide, register-based  
11 study. *BMJ Open*. 2016;6:e010662.  
12  
13
- 14 11. Wu CK, Huang YT, Lee JK, Jimmy Juang JM, Tsai CT, Lai LP et al. Anti-anxiety  
15 drugs use and cardiovascular outcomes in patients with myocardial infarction: a  
16 national wide assessment. *Atherosclerosis*. 2014;235:496-502.  
17  
18
- 19 12. Obiora E, Hubbard R, Sanders RD, Myles PR. The impact of benzodiazepines on  
20 occurrence of pneumonia and mortality from pneumonia: a nested case-control and  
21 survival analysis in a population-based cohort. *Thorax*. 2013; 68:163-70.  
22  
23
- 24 13. Billioti de Gage S, Bégaud B, Bazin F, Verdoux H, Dartigues JF, Pérès K et al.  
25 Benzodiazepine use and risk of dementia: prospective population based study. *BMJ*.  
26 2012;345:e6231.  
27  
28
- 29 14. Forster A, Juge O, Morel D. Effects of midazolam on cerebral blood flow in human  
30 volunteers. *Anesthesiology*. 1982;56:453-5.  
31  
32
- 33 15. Bartlett E, Mikulis DJ. Chasing "chasing the dragon" with MRI: leukoencephalopathy  
34 in drug abuse. *British J Radiol*. 2005;78:997-1004.  
35  
36  
37  
38  
39  
40  
41  
42  
43  
44  
45  
46  
47  
48  
49  
50  
51  
52  
53  
54  
55  
56  
57  
58  
59  
60

**ONLINE SUPPLEMENT.****Supplemental table 1. Main baseline characteristics of patients loss and not loss at 90-day**

|                                  | 90-day follow-up |             |
|----------------------------------|------------------|-------------|
|                                  | Yes (n=316)      | No (n=20)   |
| Number of patients               | 316              | 20          |
| Benzodiazepine use               | 58 (18.3)        | 4 (20.0)    |
| Age, y, mean±SD                  | 66.6 ± 14.9      | 71.5 ± 12.9 |
| Men                              | 170 (53.8)       | 10 (50.0)   |
| Medical history                  |                  |             |
| Previous stroke                  | 32 (10.1)        | 3 (15.8)    |
| Previous TIA                     | 24 (7.6)         | 1 (5.0)     |
| Coronary artery disease          | 63 (19.9)        | 6 (30.0)    |
| Sleep apnea syndrome             | 9 (2.9)          | 0 (0.0)     |
| Heart rhythm disorders           | 75 (23.8)        | 4 (20.0)    |
| Vascular risk factors            |                  |             |
| Arterial hypertension            | 190 (60.1)       | 13 (65.0)   |
| Diabetes mellitus                | 61 (19.3)        | 5 (25.0)    |
| Hypercholesterolemia             | 149 (47.1)       | 9 (45.0)    |
| Hypertriglyceridemia             | 51 (16.1)        | 1 (5.0)     |
| Smoking                          | 94 (19.7)        | 8 (40.0)    |
| Chronic ethanol consumption      | 49 (15.6)        | 3 (15.0)    |
| BMI, kg/m <sup>2</sup> , mean±SD | 26.8 ± 5.0       | 25.5 ± 3.9  |

Data are expressed as number (%) unless otherwise indicated.

Abbreviations: BMI= body mass index, SD=standard deviation, TIA=transient ischemic attack.

**Supplemental table 2. Main baseline characteristics of alive patients with and without missing MMSE at 8- and 90-days**

|                                  | 8-day MMSE  |             | 90-day MMSE |             |
|----------------------------------|-------------|-------------|-------------|-------------|
|                                  | Not missing | Missing     | Not missing | Missing     |
| Number of patients               | 236         | 89          | 229         | 71          |
| Benzodiazepine use               | 40 (16.9)   | 17 (19.1)   | 35 (15.3)   | 12 (16.9)   |
| Age, y, mean±SD                  | 65.2 ± 14.4 | 70.3 ± 15.2 | 65.5 ± 14.9 | 69.8 ± 13.3 |
| Men                              | 132 (55.9)  | 45 (50.6)   | 128 (55.9)  | 37 (52.1)   |
| Medical history                  |             |             |             |             |
| Previous stroke                  | 22 (9.3)    | 10 (11.4)   | 22 (9.6)    | 8 (11.4)    |
| Previous TIA                     | 16 (6.8)    | 9 (10.1)    | 14 (6.1)    | 7 (9.9)     |
| Coronary artery disease          | 40 (16.9)   | 26 (29.2)   | 44 (19.2)   | 14 (19.7)   |
| Sleep apnea syndrome             | 6 (2.6)     | 3 (3.4)     | 4 (1.8)     | 4 (5.7)     |
| Heart rhythm disorders           | 51 (21.6)   | 24 (27.3)   | 52 (22.8)   | 19 (26.8)   |
| Vascular risk factors            |             |             |             |             |
| Arterial hypertension            | 137 (58.0)  | 57 (64.0)   | 138 (60.3)  | 42 (59.1)   |
| Diabetes mellitus                | 44 (18.6)   | 19 (21.3)   | 47 (20.5)   | 12 (16.9)   |
| Hypercholesterolemia             | 107 (45.3)  | 47 (52.8)   | 111 (48.5)  | 31 (43.7)   |
| Hypertriglyceridemia             | 41 (17.4)   | 10 (11.2)   | 40 (17.5)   | 8 (11.3)    |
| Smoking                          | 81 (34.3)   | 18 (20.2)   | 67 (29.3)   | 23 (32.4)   |
| Chronic ethanol consumption      | 39 (16.7)   | 13 (14.6)   | 38 (16.6)   | 13 (18.6)   |
| BMI, kg/m <sup>2</sup> , mean±SD | 26.7 ± 4.8  | 27.0 ± 5.1  | 26.8 ± 4.8  | 26.6 ± 5.0  |

Data are expressed as number (%) unless otherwise indicated.

Abbreviations: BMI= body mass index, SD=standard deviation, TIA=transient ischemic attack.



## STROBE Statement—checklist of items that should be included in reports of observational studies

|                              | Item No | Recommendation                                                                                                                                                                                                                                                                                                                                                                                                                                                                        |
|------------------------------|---------|---------------------------------------------------------------------------------------------------------------------------------------------------------------------------------------------------------------------------------------------------------------------------------------------------------------------------------------------------------------------------------------------------------------------------------------------------------------------------------------|
| <b>Title and abstract</b>    | 1       | (a) Indicate the study's design with a commonly used term in the title or the abstract <a href="#">Page 2</a><br>(b) Provide in the abstract an informative and balanced summary of what was done and what was found ( <a href="#">Page 2</a> )                                                                                                                                                                                                                                       |
| <b>Introduction</b>          |         |                                                                                                                                                                                                                                                                                                                                                                                                                                                                                       |
| Background/rationale         | 2       | Explain the scientific background and rationale for the investigation being reported <a href="#">Page 4</a>                                                                                                                                                                                                                                                                                                                                                                           |
| Objectives                   | 3       | State specific objectives, including any prespecified hypotheses <a href="#">Page 4</a>                                                                                                                                                                                                                                                                                                                                                                                               |
| <b>Methods</b>               |         |                                                                                                                                                                                                                                                                                                                                                                                                                                                                                       |
| Study design                 | 4       | Present key elements of study design early in the paper ( <a href="#">page 5</a> )                                                                                                                                                                                                                                                                                                                                                                                                    |
| Setting                      | 5       | Describe the setting, locations, and relevant dates, including periods of recruitment, exposure, follow-up, and data collection ( <a href="#">page 5</a> )                                                                                                                                                                                                                                                                                                                            |
| Participants                 | 6       | <i>Cohort study</i> —Give the eligibility criteria, and the sources and methods of selection of participants. Describe methods of follow-up ( <a href="#">page 5</a> )<br>(b) <i>Cohort study</i> —For matched studies, give matching criteria and number of exposed and unexposed (NA)                                                                                                                                                                                               |
| Variables                    | 7       | Clearly define all outcomes, exposures, predictors, potential confounders, and effect modifiers. Give diagnostic criteria, if applicable ( <a href="#">page 5</a> )                                                                                                                                                                                                                                                                                                                   |
| Data sources/<br>measurement | 8*      | For each variable of interest, give sources of data and details of methods of assessment (measurement). Describe comparability of assessment methods if there is more than one group ( <a href="#">page 5-6</a> )                                                                                                                                                                                                                                                                     |
| Bias                         | 9       | Describe any efforts to address potential sources of bias (NA)                                                                                                                                                                                                                                                                                                                                                                                                                        |
| Study size                   | 10      | Explain how the study size was arrived ( <a href="#">page 5</a> )                                                                                                                                                                                                                                                                                                                                                                                                                     |
| Quantitative variables       | 11      | Explain how quantitative variables were handled in the analyses. If applicable, describe which groupings were chosen and why ( <a href="#">page 6</a> )                                                                                                                                                                                                                                                                                                                               |
| Statistical methods          | 12      | (a) Describe all statistical methods, including those used to control for confounding ( <a href="#">page 6</a> )<br>(b) Describe any methods used to examine subgroups and interactions ( <a href="#">page 6</a> )<br>(c) Explain how missing data were addressed ( <a href="#">pages 6-7</a> )<br>(d) <i>Cohort study</i> —If applicable, explain how loss to follow-up was addressed ( <a href="#">page 6</a> )<br>(e) Describe any sensitivity analyses ( <a href="#">page 6</a> ) |

Continued on next page

**Results**

|                  |     |                                                                                                                                                                                                                                                                                                                                                                                                                                                                                        |
|------------------|-----|----------------------------------------------------------------------------------------------------------------------------------------------------------------------------------------------------------------------------------------------------------------------------------------------------------------------------------------------------------------------------------------------------------------------------------------------------------------------------------------|
| Participants     | 13* | (a) Report numbers of individuals at each stage of study—eg numbers potentially eligible, examined for eligibility, confirmed eligible, included in the study, completing follow-up, and analysed ( <a href="#">page 8</a> )<br>(b) Give reasons for non-participation at each stage ( <a href="#">page 8</a> )<br>(c) Consider use of a flow diagram (NA)                                                                                                                             |
| Descriptive data | 14* | (a) Give characteristics of study participants (eg demographic, clinical, social) and information on exposures and potential confounders ( <a href="#">page 8; 15-16</a> )<br>(b) Indicate number of participants with missing data for each variable of interest ( <a href="#">page 8; 15-16</a> )<br>(c) <i>Cohort study</i> —Summarise follow-up time (eg, average and total amount) ( <a href="#">page 8; 15-16</a> )                                                              |
| Outcome data     | 15* | <i>Cohort study</i> —Report numbers of outcome events or summary measures over time ( <a href="#">page 8;17</a> )                                                                                                                                                                                                                                                                                                                                                                      |
| Main results     | 16  | (a) Give unadjusted estimates and, if applicable, confounder-adjusted estimates and their precision (eg, 95% confidence interval). Make clear which confounders were adjusted for and why they were included ( <a href="#">page 8; 15-17</a> )<br>(b) Report category boundaries when continuous variables were categorized ( <a href="#">page 8; 15-17</a> )<br>(c) If relevant, consider translating estimates of relative risk into absolute risk for a meaningful time period (NA) |
| Other analyses   | 17  | Report other analyses done—eg analyses of subgroups and interactions, and sensitivity analyses ( <a href="#">suppl file</a> )                                                                                                                                                                                                                                                                                                                                                          |

**Discussion**

|                  |    |                                                                                                                                                                                                        |
|------------------|----|--------------------------------------------------------------------------------------------------------------------------------------------------------------------------------------------------------|
| Key results      | 18 | Summarise key results with reference to study objectives ( <a href="#">page 10</a> )                                                                                                                   |
| Limitations      | 19 | Discuss limitations of the study, taking into account sources of potential bias or imprecision. Discuss both direction and magnitude of any potential bias ( <a href="#">page 10-12</a> )              |
| Interpretation   | 20 | Give a cautious overall interpretation of results considering objectives, limitations, multiplicity of analyses, results from similar studies, and other relevant evidence ( <a href="#">page 13</a> ) |
| Generalisability | 21 | Discuss the generalisability (external validity) of the study results ( <a href="#">pages 13-14</a> )                                                                                                  |

**Other information**

|         |    |                                                                                                                                                                                           |
|---------|----|-------------------------------------------------------------------------------------------------------------------------------------------------------------------------------------------|
| Funding | 22 | Give the source of funding and the role of the funders for the present study and, if applicable, for the original study on which the present article is based ( <a href="#">page 18</a> ) |
|---------|----|-------------------------------------------------------------------------------------------------------------------------------------------------------------------------------------------|

\*Give information separately for cases and controls in case-control studies and, if applicable, for exposed and unexposed groups in cohort and cross-sectional studies.

**Note:** An Explanation and Elaboration article discusses each checklist item and gives methodological background and published examples of transparent reporting. The STROBE checklist is best used in conjunction with this article (freely available on the Web sites of PLoS Medicine at <http://www.plosmedicine.org/>, Annals of Internal Medicine at <http://www.annals.org/>, and Epidemiology at <http://www.epidem.com/>). Information on the STROBE Initiative is available at [www.strobe-statement.org](http://www.strobe-statement.org).

# BMJ Open

## Preadmission use of benzodiazepines and stroke outcomes: the Biostroke prospective cohort study.

|                                 |                                                                                                                                                                                                                                                                                                                                                                                                                                                                                                                                                                                                                                                                                                                                                                                                                                                                                                                                                                                                                                                                                                                                                                                                                                                                                                           |
|---------------------------------|-----------------------------------------------------------------------------------------------------------------------------------------------------------------------------------------------------------------------------------------------------------------------------------------------------------------------------------------------------------------------------------------------------------------------------------------------------------------------------------------------------------------------------------------------------------------------------------------------------------------------------------------------------------------------------------------------------------------------------------------------------------------------------------------------------------------------------------------------------------------------------------------------------------------------------------------------------------------------------------------------------------------------------------------------------------------------------------------------------------------------------------------------------------------------------------------------------------------------------------------------------------------------------------------------------------|
| Journal:                        | <i>BMJ Open</i>                                                                                                                                                                                                                                                                                                                                                                                                                                                                                                                                                                                                                                                                                                                                                                                                                                                                                                                                                                                                                                                                                                                                                                                                                                                                                           |
| Manuscript ID                   | bmjopen-2018-022720.R1                                                                                                                                                                                                                                                                                                                                                                                                                                                                                                                                                                                                                                                                                                                                                                                                                                                                                                                                                                                                                                                                                                                                                                                                                                                                                    |
| Article Type:                   | Research                                                                                                                                                                                                                                                                                                                                                                                                                                                                                                                                                                                                                                                                                                                                                                                                                                                                                                                                                                                                                                                                                                                                                                                                                                                                                                  |
| Date Submitted by the Author:   | 30-Jul-2018                                                                                                                                                                                                                                                                                                                                                                                                                                                                                                                                                                                                                                                                                                                                                                                                                                                                                                                                                                                                                                                                                                                                                                                                                                                                                               |
| Complete List of Authors:       | Colin, Olivier; Univ Lille; Inserm ; CHU Lille ; UMR-S 1171 "Degenerative and Vascular Cognitive Disorders", F59000-Lille, France.;<br>2. Univ Poitiers, Centre d'Investigation Clinique CIC1402 INSERM & Neurology Unit, CHU Poitiers, CS90577, 86021, Poitiers Cedex, France.<br>Labreuche, Julien; Univ Lille; Inserm ; CHU Lille ; EA2694, F59000-Lille, France.<br>Deguil, Julie; Univ Lille; Inserm ; CHU Lille ; UMR-S 1171 "Degenerative and Vascular Cognitive Disorders", F59000-Lille, France.<br>Mendyk, Anne Marie ; Univ Lille; Inserm ; CHU Lille ; UMR-S 1171 "Degenerative and Vascular Cognitive Disorders", F59000-Lille, France.<br>Deken , Valerie; Univ Lille; Inserm ; CHU Lille ; EA2694, F59000-Lille, France.<br>Cordonnier, Charlotte; Univ Lille; Inserm ; CHU Lille ; UMR-S 1171 "Degenerative and Vascular Cognitive Disorders", F59000-Lille, France.<br>Deplanque, Dominique; Univ Lille; Inserm ; CHU Lille ; UMR-S 1171 "Degenerative and Vascular Cognitive Disorders", F59000-Lille, France.<br>Leys, Didier; Univ Lille; Inserm ; CHU Lille ; UMR-S 1171 "Degenerative and Vascular Cognitive Disorders", F59000-Lille, France.<br>Bordet, Régis; Univ Lille; Inserm ; CHU Lille ; UMR-S 1171 "Degenerative and Vascular Cognitive Disorders", F59000-Lille, France. |
| <b>Primary Subject Heading</b>: | Neurology                                                                                                                                                                                                                                                                                                                                                                                                                                                                                                                                                                                                                                                                                                                                                                                                                                                                                                                                                                                                                                                                                                                                                                                                                                                                                                 |
| Secondary Subject Heading:      | Pharmacology and therapeutics, Public health                                                                                                                                                                                                                                                                                                                                                                                                                                                                                                                                                                                                                                                                                                                                                                                                                                                                                                                                                                                                                                                                                                                                                                                                                                                              |
| Keywords:                       | Stroke < NEUROLOGY, mortality, benzodiazepines                                                                                                                                                                                                                                                                                                                                                                                                                                                                                                                                                                                                                                                                                                                                                                                                                                                                                                                                                                                                                                                                                                                                                                                                                                                            |
|                                 |                                                                                                                                                                                                                                                                                                                                                                                                                                                                                                                                                                                                                                                                                                                                                                                                                                                                                                                                                                                                                                                                                                                                                                                                                                                                                                           |

SCHOLARONE™  
Manuscripts

1  
2  
3 **Preadmission use of benzodiazepines and stroke outcomes: the Biostroke prospective**  
4 **cohort study.**  
5

6  
7  
8 Olivier Colin, MD<sup>1,2</sup>; Julien Labreuche, MD<sup>3</sup>; Julie Deguil, PhD<sup>1</sup>; Anne-Marie Mendyk<sup>1</sup>;  
9  
10 Valérie Deken<sup>3</sup>; Charlotte Cordonnier, MD, PhD<sup>1</sup>; Dominique Deplanque MD, PhD<sup>1</sup>; Didier  
11  
12 Leys MD, PhD<sup>1</sup>, Régis Bordet MD, PhD<sup>1</sup>.  
13  
14

- 15  
16 1. Univ Lille; Inserm ; CHU Lille ; UMR-S 1171 “Degenerative and Vascular Cognitive  
17 Disorders”, F59000-Lille, France.  
18  
19 2. Univ Poitiers, Centre d'Investigation Clinique CIC1402 INSERM & Neurology Unit,  
20 CHU Poitiers, CS90577, 86021, Poitiers Cedex, France.  
21  
22 3. Univ Lille; Inserm ; CHU Lille ; EA2694, F59000-Lille, France.  
23  
24  
25  
26  
27

28  
29 Corresponding author: Olivier Colin, Centre Hospitalier Universitaire de Poitiers, Neurology  
30 Unit, CS90577, 86021, Poitiers Cedex, France; 00335494446, fax: 0033549443856, e-mail :  
31 [olivier.colin@chu-poitiers.fr](mailto:olivier.colin@chu-poitiers.fr)  
32  
33  
34  
35

36 List of figures and tables:  
37

38  
39 Figure 1. Absolute standardized differences between benzodiazepine users and non-users  
40 before and after propensity score matching.  
41  
42

43 Table 1. Comparison of baseline characteristics between benzodiazepine users and non-users.  
44

45 Table 2. Outcomes at 8-day and 90-day after stroke according to prior benzodiazepine use in  
46 propensity-score-matched cohort.  
47  
48

49 Table 3. Outcomes at 8-day and 90-day after stroke according to prior benzodiazepine use in  
50 propensity-score adjusted cohorts.  
51  
52  
53  
54  
55  
56  
57  
58  
59  
60

1  
2  
3 Key words: benzodiazepines; stroke; mortality.  
4

5  
6 Subject terms: stroke: ischemic stroke; quality and outcomes: mortality/survival;  
7  
8 epidemiology, lifestyle, and prevention: risk factors.  
9  
10  
11  
12  
13  
14  
15  
16  
17  
18  
19  
20  
21  
22  
23  
24  
25  
26  
27  
28  
29  
30  
31  
32  
33  
34  
35  
36  
37  
38  
39  
40  
41  
42  
43  
44  
45  
46  
47  
48  
49  
50  
51  
52  
53  
54  
55  
56  
57  
58  
59  
60

**ABSTRACT.**

**Objectives.** We tested the hypothesis that stroke outcomes in patients with preadmission use of benzodiazepine are worse.

**Method.** In a prospective cohort study, we recruited patients with acute ischemic stroke. Mortality, functional outcomes and cognition were evaluated at 8 and 90 days after stroke.

**Results.** 370 patients were included. 62 (18.5%) of 336 remainder patients were treated with benzodiazepines when stroke occurred, and they did not receive any other psychotropic drug. The mortality rate was higher in benzodiazepines users than non-users at day-8 (2.2% vs. 8.1%,  $p=0.034$ ) and day-90 (8.1% vs. 25.9%,  $p=0.0001$ ). After controlling for baseline differences using propensity-score matching, only the difference in mortality rate at 90-day was of borderline of significance, with a matched OR of 3.93 (95%IC, 0.91-16.98). In adjusted-propensity-score cohort, this difference remained significant with a similar treatment effect size (adjusted OR, 3.50; 95%CI, 1.57-7.76). A higher rate of poor functional outcome at day-8 and day-90 defined by  $mRS \geq 2$  or by the  $BI < 95$  was found in benzodiazepines users. In propensity-score adjusted cohort, only the difference in  $mRS \geq 2$  at 90-day remained significant (adjusted OR, 1.89; 95%CI, 1.02-3.48). In survivors at day-8 and at day-90, there was no significant difference in cognitive evaluation.

**Conclusion:** Our study has shown that preadmission use of benzodiazepines could be associated with increased post-stroke mortality at 90 days. These findings do not support a putative neuroprotective effect of GABA<sub>A</sub> receptors agonists and should alert clinicians of their potential risks. (clinicaltrials.gov: NCT00763217)

## STRENGTHS AND LIMITATIONS OF THIS STUDY

- This cohort study has a great potential with regards to public health in the field of stroke outcomes, as benzodiazepines are one of the most prescribed drugs in the world.
- These results are consistent with those from the literature of a non-neuroprotective effect of benzodiazepines.
- These results might be confounded by indication bias (between benzodiazepines users and non-users) but the use of a propensity score matching/adjustment partially addresses this concern.
- There is a lack of consistency of results for mortality and functional outcomes of stroke, suggesting new experimental approaches, to provide and appropriate mechanistic explanation.
- Our results should be interpreted as hypothesis generating (without possibility of concluding that there is a causal effect) and should be replicated in further studies.

## INTRODUCTION.

Stroke is the second most common cause of death and the third most common cause of disability-adjusted life-years worldwide.<sup>1</sup> Considering the long-term neurological disabilities which may result from acute stroke, and differences in the extent of recovery among stroke survivors, predicting the outcomes of stroke is a very important issue.<sup>1</sup> A wide variety of factors influence stroke prognosis, including age, stroke severity, comorbid conditions, clinical findings...<sup>2</sup> Knowledge of others factors - as pharmacologic and use of drugs - that could influence the severity and short-term outcomes of stroke prognosis is necessary for clinicians. For example, benzodiazepines have been first considered as a type of neuroprotective agent in reducing infarct size and improving functional outcome in animal models of cerebral ischaemia.<sup>3,4</sup> However, in humans, a recent review does not provide the evidence to support the use of benzodiazepines (GABA receptor agonists) for the treatment of patients with acute ischaemic stroke.<sup>5</sup> Benzodiazepines and ethanol share several central effects, especially on activation of inhibitory  $\gamma$  amino-butyric acid<sub>A</sub> (GABA<sub>A</sub>) receptors in the brain. We have recently shown that excessive chronic ethanol consumption is associated with higher stroke severity.<sup>6</sup> Interestingly, the impact of preadmission use of benzodiazepine in stroke had never been evaluated as stroke is emerging as a leading cause of preventable death and disability worldwide. Benzodiazepines, because of their good efficacy and rapidity of action, are also one of the most prescribed drugs in the world, widely used for anxiety and insomnia. The objective of our study was so to investigate the effect of preadmission use of benzodiazepine usage on stroke outcome, to clarify their role as stroke prognostic factors



## METHODS.

### Patient and public involvement statement.

Patients with ischemic stroke admitted to our university hospital's stroke unit (*Lille, France*) within 48 hours of symptom onset were recruited in the prospective “Biostroke” cohort (Clinical Biological and Pharmacological Factors Influencing Stroke Outcome). The aim of the study was to understand the mechanisms of preventive neuroprotection by establishing link between biomarkers and preventive and neuroprotective measures (clinicaltrials.gov: number NCT00763217).<sup>6</sup> Use of benzodiazepine was one of the interests. The local independent ethical committee approved the study (*Comité de Protection des Personnes Nord-Ouest IV*). Patients were managed according to local rules without any investigation or treatment specifically performed. Patients or close relatives gave a signed informed consent.

### Data collection and clinical outcomes definition.

All patients underwent an initial standardized evaluation, including their medical history) and vascular risk factors (using a structured questionnaire), a physical examination, a routine blood biochemistry screen, and diagnostic testing. At admission patients underwent either CT or MRI scan.

Patients had a follow-up examination 8 and 90 days after admission. The modified Rankin scale (mRS), the Barthel index (BI), the Mini Mental State Examination (MMSE), and all-cause mortality were recorded. Definitions used for variables included in the analysis have been previously defined.<sup>2</sup> A National Institutes of Health Stroke Scale (NIHSS) score  $\geq 6$  was considered as a severe clinical impairment. A mRS score  $\geq 2$  (poor functional outcome), a BI score  $< 95$  (poor functional outcome), and a MMSE score  $< 24$  (cognitive impairment) were

1  
2  
3 considered as the worst possible stroke outcomes.<sup>2</sup> We also analysed the association between  
4  
5 benzodiazepine use and respiratory failure and pneumonia at the acute phase of stroke.  
6  
7

#### 8 9 Preadmission use of GABA receptors agonists.

10  
11 Drug exposition was defined by benzodiazepine drugs administered orally for more  
12  
13 than fifteen days before stroke regardless of length of treatment period and dosage of  
14  
15 treatment. Hypnotic drugs were also included, since they act on similar receptors to the  
16  
17 benzodiazepines. Patients with concomitant use of other psychoactive drugs were excluded,  
18  
19 because of their possible confounding effects.  
20  
21

#### 22 23 24 Statistical analysis.

25  
26 Quantitative variables are expressed as mean (standard deviation) in case of normal  
27  
28 distribution or median (interquartile range) otherwise. Categorical variables are expressed as  
29  
30 numbers (percentage). Normality of distributions were assessed using histograms and  
31  
32 Shapiro-Wilk test. Bivariate comparisons between benzodiazepine users and non-users were  
33  
34 performed using Student's t test for quantitative variables (Mann-Whitney U test was used for  
35  
36 non-Gaussian distribution) and Chi-squared test (Fisher's exact test was used when the  
37  
38 expected cell frequency was <5) for categorical variables  
39  
40

41  
42 We assessed the effect of the benzodiazepine use on clinical outcomes at 8 and 90  
43  
44 days (all-cause mortality, NIHSS  $\geq 6$ , mRS  $\geq 2$ , BI < 95 and MMSE < 24) using logistic  
45  
46 regression models and calculated the odds ratio (OR) associated with benzodiazepine use as  
47  
48 the treatment effect size. In order to reduce the effects of potential confounding factors in the  
49  
50 between-group comparisons, we used propensity-score methods.<sup>7</sup> As the main analysis,  
51  
52 propensity score was used to assemble well-balanced groups (propensity score-matched  
53  
54 cohort) and generalized estimating equations (GEE) models were used to take into account  
55  
56  
57  
58  
59  
60

1  
2  
3 the matched design. As a secondary analysis, the propensity score was used as a covariate in  
4  
5 logistic regression models to adjust the comparisons (propensity score-adjusted cohort).  
6

7 The propensity score was estimated using a non-parsimonious multivariate logistic  
8  
9 regression model, with the benzodiazepine treatment group as the dependent variable and all  
10  
11 of the characteristics listed in Table 1 as covariates. Benzodiazepine users were matched 1:1  
12  
13 to patients in the non-benzodiazepine users according to propensity score using the greedy  
14  
15 nearest neighbor matching algorithm with a caliper width of 0.2 standard deviation of logit for  
16  
17 propensity score.<sup>8,9</sup> To evaluate bias reduction using the propensity score matching method,  
18  
19 absolute standardized differences were calculated before and after propensity-score matching;  
20  
21 an absolute standardized difference > 10% indicated a meaningful imbalance in the baseline  
22  
23 covariate.<sup>10</sup>  
24  
25

26 Because of missing baseline data (see supplemental table 1), the propensity score could not be  
27  
28 computed in 54.5% (n=183) of the study sample (61.3% in benzodiazepine users and 52.9%  
29  
30 in non-benzodiazepine users). We therefore estimated the treatment effect size in propensity  
31  
32 score-matched- and -adjusted cohorts after handling missing covariate values by multiple  
33  
34 imputation<sup>11</sup> using a regression switching approach (chained equations with m=20  
35  
36 imputations obtained using the R statistical software version 3.03).<sup>12</sup> Imputation procedure  
37  
38 was performed under the missing at random assumption using all variables listed in Table 1  
39  
40 (i.e. baseline characteristics and treatment group) with a predictive mean matching method for  
41  
42 continuous variables and logistic regression model for categorical (all binary) variables. In  
43  
44 each imputed dataset, we calculated the propensity score and assembled a matched cohort to  
45  
46 provide both adjusted and matched ORs. We therefore combined the ORs from each imputed  
47  
48 dataset using Rubin's rules.<sup>13</sup>  
49  
50  
51  
52  
53  
54  
55  
56  
57  
58  
59  
60

1  
2  
3 Since, among alive patients, the rate of missing data was high for 8- and 90-day  
4 MMSE (27% and 24%, respectively), we also used multiple imputation approach to handle  
5 these missing values as a sensitivity analysis. Statistical testing was done at the two-tailed  $\alpha$   
6 level of 0.05. Data were analyzed using SAS software (version 9.3, SAS Institute Inc., Cary,  
7 NC, USA).  
8  
9  
10  
11  
12  
13  
14  
15  
16  
17  
18  
19  
20  
21  
22  
23  
24  
25  
26  
27  
28  
29  
30  
31  
32  
33  
34  
35  
36  
37  
38  
39  
40  
41  
42  
43  
44  
45  
46  
47  
48  
49  
50  
51  
52  
53  
54  
55  
56  
57  
58  
59  
60

## RESULTS

Among the 370 patients included in the Biostroke study, 34 patients (mean age, 69.0±13.7; 14 men) were excluded because of concomitant use of other psychoactive drugs. In the 336 remainders, 62 (18.5%) were under benzodiazepines when stroke occurred.

### **Benzodiazepine and baseline characteristics.**

The baseline characteristics of the study population according to benzodiazepine treatment are described in Table 1. Before matching, several meaningful differences (absolute standardized difference >10%) were found. In particular, benzodiazepine users were older (73.1±12.6 *versus* 65.4±15.0,  $p=0.0002$ ), more likely to be women (62.9 *versus* 42.7%,  $p=0.004$ ) and to have arterial hypertension (77.4% *versus* 56.6%,  $p=0.002$ ), lower BMI (25.6±4.8 *versus* 27.0±4.9,  $p=0.042$ ) and lower levels of alanine aminotransferase (18 (14-23) *versus* 21 (15-29),  $p=0.029$ ) than benzodiazepine users. These differences were reduced after propensity score-matching (Figure 1 & supplemental table 2) with an absolute standardized difference >10% only for onset to admission time (22.0%), and prothrombin index (14.8%) suggesting that the two study groups were well balanced after matching.

### **Benzodiazepine and Outcomes**

Of the 336 study patients, 20 patients were lost to follow-up between day 8 and day 90 (see supplemental table 3 for their main characteristics). Death occurred in 11 patients (3.3%) at day-8 and 36 (11.4%) at day-90 (see supplemental table 4 for main individual characteristics of mortality cases). 57.9% of survivor patients taking benzodiazepines at admission continued to take them after stroke at day-8, 46.5 % at day-90.

In unadjusted analysis, the mortality rate was higher in benzodiazepines users than non-users at day-8 (2.2% vs. 8.1%,  $p=0.034$ ) and day-90 (8.1% vs. 25.9%,  $p=0.0001$ ).

1  
2  
3 However, after controlling for baseline differences using propensity-score matching, only the  
4 difference in mortality rate at 90-day was of borderline of significance, with a matched OR of  
5 3.93 (95%IC, 0.91-16.98; table 2). In adjusted-propensity-score cohort, this difference  
6 remained significant with a similar treatment effect size (adjusted OR, 3.50; 95%CI, 1.57 to  
7 7.76; table 3).  
8  
9  
10  
11  
12

13 In unadjusted analysis, a higher rate of poor functional outcome at day-8 defined by  
14 mRS $\geq$ 2 or by the BI $<$ 95 was found in benzodiazepines users (table 3). A similar between-  
15 group difference was found for mRS  $\geq$ 2 at 90-day. However, none of the differences were  
16 found in propensity-score matched (table 2). In propensity-score adjusted cohort, only the  
17 difference in mRS  $\geq$ 2 at 90-day remained significant (adjusted OR, 1.89; 95%CI, 1.02 to  
18 3.48).  
19  
20  
21  
22  
23  
24  
25

26 In survivors at day-8 or at day-90, there was no significant difference in MMSE, in  
27 unadjusted, propensity-score matched and adjusted analyses. When the analyses were  
28 repeated after handling the missing data on MMSE by using multiple imputation approach  
29 (see supplemental tables 4 for main baseline characteristics in patients with and without  
30 missing values), similar non-significant differences were found. In propensity-score matched  
31 cohort, the OR (95%CI) were 0.82 (0.30 to 2.19) for 8-day MMSE $<$ 24 and 1.04 (0.23 to 4.51)  
32 for 90-day MMSE $<$ 24. In propensity-score adjusted cohort, the OR (95%CI) were 0.89 (0.43  
33 to 1.83) for 8-day MMSE $<$ 24 and 1.04 (0.34 to 3.16) for 90-day MMSE $<$ 24.  
34  
35  
36  
37  
38  
39  
40  
41  
42  
43

44 Regarding respiratory failure or pneumonia at 8 day, benzodiazepines users have a  
45 similar early respiratory complications risk than non-users (13.8% (n=8) vs. 15.6% (n=48),  
46 unadjusted  $p=0.73$ ).  
47  
48  
49  
50  
51  
52  
53  
54  
55  
56  
57  
58  
59  
60

## DISCUSSION

Preadmission use of benzodiazepines could not be considered as neuroprotective, as users of benzodiazepines could have a higher risk of death at 90-days after stroke.

### **Mortality and benzodiazepines.**

A recent review does not provide the evidence to support the use of GABA receptor agonists for the treatment of patients with acute ischaemic stroke.<sup>5</sup> Randomized controlled trials (RCTs) investigating GABA receptor agonists versus placebo for acute stroke patients with the outcomes of death or dependency and functional independence were included. These RCTs measured death and dependency at three months in clomethiazole versus placebo or between diazepam and placebo without significant difference. In a recent non-randomized comparison, treatment with benzodiazepines after ischaemic stroke had no independent impact on stroke outcomes and mortality at 90-day.<sup>14</sup> However, these data were registered in a trials archive and were not derived from prospective trials, with indication bias and many confounders. In our prospective study, current users of benzodiazepines could have a higher rate of post-stroke mortality at 90-day. Effect of benzodiazepine drugs on mortality is still debated, but these results are consistent with those from the literature. In a large cohort of patients attending primary care, GABA<sub>A</sub> receptors agonists were associated with significantly increased risk of mortality.<sup>15</sup> In two other representative databases, a significant while moderate increase in all-cause mortality in relation to benzodiazepines was found, in a population of incident and mostly occasional users.<sup>16</sup> A recent population-wide register-based study identified that benzodiazepines are more frequently used in patients with strokes than in controls and are associated with greater all-cause mortality in patients with stroke and matched controls.<sup>17</sup> The use of anti-anxiety medication and mortality risk in patients following

1  
2 myocardial has also been studied in a sampling database.<sup>18</sup> Sudden death was significantly  
3 associated with increased benzodiazepam dosage during approximately five years. For  
4 patients receiving higher doses of daily benzodiazepines, protective effects for cardiac  
5 mortality and heart failure hospitalization decreased and a J-curve dose-response relationship  
6 was seen, without providing an adequate mechanistic explanation. Benzodiazepines have been  
7 shown to increase the occurrence of community-acquired pneumonia,<sup>19</sup> due to their  
8 pharmacodynamic properties. In our cohort, prior use of benzodiazepines didn't increase the  
9 incidence of respiratory depression and cannot explain mortality in these patients.  
10  
11  
12  
13  
14  
15  
16  
17  
18  
19  
20  
21

### 22 **Cognition and benzodiazepines.**

23  
24 Benzodiazepine use was neither associated with cognitive impairment at 8 days or 90  
25 days. However, the short-term effects of benzodiazepines on impairment cognition are well  
26 known and use of benzodiazepines is also associated with increased risk of dementia, even if  
27 the nature of the link between benzodiazepines and Alzheimer's disease remains unclear.<sup>20</sup> In  
28 our cohort, GABA receptor agonists treatment before stroke didn't show cognitive  
29 impairment as assessed by MMSE, in these elderly patients without dementia, but a longer  
30 follow-up period may be useful. Further, although we use methods to impute for missing data,  
31 data are missing on follow-up - loss to follow-up in a set, and then lack of doing MMSE on  
32 follow-up in another set (post-stroke aphasia) - which are likely not missing at random.  
33  
34  
35  
36  
37  
38  
39  
40  
41  
42  
43  
44  
45

### 46 **Comorbid alcohol use disorder.**

47  
48 Prior benzodiazepine use (regardless the dosage of treatment) was not associated with  
49 higher baseline stroke severity, as excessive chronic ethanol consumption was.<sup>6</sup>  
50 Benzodiazepine users were also less likely to be alcohol drinkers in our study, although the  
51 difference did not reach the significance level. So, the relationship between stroke severity  
52  
53  
54  
55  
56  
57  
58  
59  
60



1  
2  
3 and alcohol consumption could not be necessarily due to a link between GABA receptors and  
4  
5 alcohol, but due to chronic effects of ethanol consumption on other organ systems.  
6  
7

### 8 9 **Strengths and limitations.**

10  
11 Our stroke data base was prospectively collected, and the study was carried out in a  
12  
13 representative cohort of routine clinical stroke patients with an exhaustive drug history  
14  
15 analysis. Dosage and compliance rate were not controlled for. More data on the length of time  
16  
17 patients had been using the drug were not available but it is reasonable to think that they had  
18  
19 an inadequate situation with excessive duration of prescription (demographic  
20  
21 characteristics).<sup>21</sup> Potentially multi-site studies need acknowledgement, as does the need for  
22  
23 replication in countries where there may be different practice in the prescribing on  
24  
25 benzodiazepines. In our study, there was no clear association between mortality and poor  
26  
27 functional outcome. For the deaths, information about the underlying cause was not obtained,  
28  
29 but was not associated with stroke severity. It is important to acknowledge that this study is  
30  
31 also limited to stroke outcomes in patients admitted to hospital after stroke. Unfortunately, we  
32  
33 don't have information on premorbid functional status.  
34  
35

36  
37 The present findings are derived from observational analyses which are subject to well-known  
38  
39 limitations. The first is the potential for confounding by measured or unmeasured variables,  
40  
41 which cannot be ruled out, even after propensity score matching/adjustment. It's also possible  
42  
43 that the indication for benzodiazepines may be a causative variable, as mood (depression or  
44  
45 anxiety) increases mortality in stroke.<sup>22</sup> Our results should be interpreted as hypothesis  
46  
47 generating (without possibility of concluding that there is a causal effect).  
48  
49

50  
51 Another limitation was the presence of missing data in some covariates, including in  
52  
53 the propensity score calculation, as well as in MMSE outcome. Although we used multiple  
54  
55 imputations to handle missing data as appropriate, we could not exclude that missing data  
56  
57  
58  
59

1  
2  
3 could introduce a bias in estimates. Since no formal study sample size was calculated, we  
4  
5 could not exclude that some differences may have been overlooked due to the lack of  
6  
7 adequate statistical power. In a posterior power calculation, we calculated the smallest  
8  
9 significant between-group difference (expressed as effect size using odd ratio) that our study  
10  
11 sample size allowed us to detect with a 80% power. Assuming an incidence of outcome of  
12  
13 10% and 50% in non-benzodiazepines users, we could detect an OR of 4.0 and 3.1 in the  
14  
15 propensity score-matched cohort and 2.8 and 2.3 in propensity score-adjusted cohort.  
16  
17  
18  
19

### 20 **Unanswered questions and implication for clinical practice.**

21  
22 The lack of consistency of results for moderate increase mortality and functional  
23  
24 outcomes make this less likely to explain a physiologic effect. Anyway, the possible increased  
25  
26 rate of mortality after stroke found in the benzodiazepines users group add to the increasing  
27  
28 body of evidence concerning a non-neuroprotective effect of GABA receptors agonists.  
29  
30 Benzodiazepines reduce the cerebral metabolic rate of oxygen and cerebral blood flow and  
31  
32 can induce post-hypoxic leukoencephalopathy.<sup>23,24</sup> As lack of blood flow leads to cerebral  
33  
34 hypoxia, it results in a cascade of biological events, which facilitates glutamate release. Based  
35  
36 upon these data, we hypothesized that chronic cerebral hypoxia could thus be induced by  
37  
38 benzodiazepine use, especially with inadequate situation with excessive duration of treatment.  
39  
40 Long-term modulation of GABA<sub>A</sub> receptors by benzodiazepines could modulate ischaemia-  
41  
42 induced glutamate release. Our findings generate a hypothesis that needs confirmation. As an  
43  
44 interventional study would not be feasible, this question can be answered through experimental  
45  
46 approaches in animals, to provide and appropriate mechanistic explanation.  
47  
48  
49  
50  
51

52 This research should also not be used to condemn GABA receptors agonist drugs since their  
53  
54 short-term use can have an important role in the management of anxiety. This study should  
55  
56  
57  
58  
59  
60

1  
2  
3 however alert clinicians to a possible increased post-stroke mortality in benzodiazepine-users.

4  
5 As patients could also be at high risk of recurrence after stroke, use of benzodiazepines should  
6  
7 be cautioned against.  
8  
9  
10  
11  
12  
13  
14  
15  
16  
17  
18  
19  
20  
21  
22  
23  
24  
25  
26  
27  
28  
29  
30  
31  
32  
33  
34  
35  
36  
37  
38  
39  
40  
41  
42  
43  
44  
45  
46  
47  
48  
49  
50  
51  
52  
53  
54  
55  
56  
57  
58  
59  
60

1  
2  
3  
4  
5 **CONCLUSION.**  
6  
7

8  
9 Our findings do not support a putative neuroprotective effect of benzodiazepines. Further  
10 larger studies are warranted to confirm the association between benzodiazepine use and early  
11 post-stroke mortality.  
12  
13  
14  
15  
16  
17  
18  
19  
20  
21  
22  
23  
24  
25  
26  
27  
28  
29  
30  
31  
32  
33  
34  
35  
36  
37  
38  
39  
40  
41  
42  
43  
44  
45  
46  
47  
48  
49  
50  
51  
52  
53  
54  
55  
56  
57  
58  
59  
60

**Table 1. Comparison of baseline characteristics between benzodiazepine users and non-users.**

|                                    | Benzodiazepine<br>non-users<br>(n=274) | Benzodiazepine<br>users<br>(n=62) | <i>P</i> (ASD, %) |
|------------------------------------|----------------------------------------|-----------------------------------|-------------------|
| <b>Demographic characteristics</b> |                                        |                                   |                   |
| Age, y, mean±SD                    | 65.4 ± 15.0                            | 73.1 ± 12.6                       | 0.0002 (55.7)     |
| Men                                | 157 (57.3)                             | 23 (37.1)                         | 0.004 (41.3)      |
| <b>Medical history</b>             |                                        |                                   |                   |
| Previous stroke                    | 28 (10.3)                              | 7 (11.3)                          | 0.81 (3.3)        |
| Previous TIA                       | 20 (7.3)                               | 5 (8.1)                           | 0.79 (2.9)        |
| Coronary artery disease            | 52 (19.0)                              | 17 (27.4)                         | 0.14 (20.1)       |
| Sleep apnea syndrome               | 7 (2.6)                                | 2 (3.2)                           | 0.68 (3.8)        |
| Heart rhythm disorders             | 59 (21.6)                              | 20 (32.3)                         | 0.075 (24.2)      |
| <b>Vascular risk factors</b>       |                                        |                                   |                   |
| Arterial hypertension              | 155 (56.6)                             | 48 (77.4)                         | 0.002 (45.5)      |
| Diabetes mellitus                  | 59 (21.5)                              | 7 (11.3)                          | 0.067 (27.9)      |
| Hypercholesterolemia               | 124 (45.3)                             | 34 (54.8)                         | 0.17 (19.3)       |
| Hypertriglyceridemia               | 41 (15.0)                              | 11 (17.7)                         | 0.58 (7.5)        |
| Smoking                            | 89 (32.5)                              | 13 (21.0)                         | 0.075 (26.2)      |
| Chronic ethanol consumption        | 45 (16.5)                              | 7 (11.5)                          | 0.33 (14.5)       |
| BMI, kg/m <sup>2</sup> , mean±SD   | 27.0 ± 4.9                             | 25.6 ± 4.8                        | 0.042 (29.6)      |
| <b>Routine drugs</b>               |                                        |                                   |                   |
| Fibrates                           | 17 (6.2)                               | 6 (9.7)                           | 0.40 (12.9)       |
| Statins                            | 85 (31.0)                              | 22 (35.5)                         | 0.50 (9.5)        |
| Oral anticoagulants                | 17 (6.2)                               | 2 (3.2)                           | 0.54 (14.1)       |
| Antiplatelet                       | 98 (35.8)                              | 28 (45.2)                         | 0.17 (19.2)       |
| ACE                                | 47 (17.1)                              | 16 (25.8)                         | 0.12 (21.2)       |
| Angiotensin II receptor antagonist | 46 (16.8)                              | 10 (16.1)                         | 0.90 (1.8)        |

|                                                        |                  |                   |              |
|--------------------------------------------------------|------------------|-------------------|--------------|
| Diuretics                                              | 65 (23.7)        | 21 (33.9)         | 0.098 (22.6) |
| Calcium channel blockers                               | 42 (15.3)        | 11 (17.7)         | 0.64 (6.5)   |
| Betablockers                                           | 98 (35.9)        | 29 (46.8)         | 0.11 (22.2)  |
| Oral hypoglycemic                                      | 45 (16.4)        | 6 (9.7)           | 0.18 (20.1)  |
| Intravenous thrombolysis                               | 78 (28.9)        | 16 (25.8)         | 0.63 (6.9)   |
| Onset to admission time, hours, median (IQR)           | 2 (1 to 7)       | 2 (1 to 4)        | 0.36 (12.8)  |
| NIHSS, median (IQR)                                    | 6 (2-13)         | 7 (2-18)          | 0.42(12.8)   |
| <b>Biological characteristics</b>                      |                  |                   |              |
| Triglycerides, g/L, median (IQR)                       | 1.06 (0.81-1.56) | 1.01 (0.84-1.56)  | 0.93 (1.3)   |
| Total cholesterol, g/L, mean±SD                        | 1.96 ± 0.49      | 1.92 ± 0.52       | 0.60 (7.4)   |
| HDL-cholesterol, g/L, mean±SD                          | 0.53 ± 0.17      | 0.54 ± 0.13       | 0.86 (2.4)   |
| LDL-cholesterol, g/L, mean±SD                          | 1.17 ± 0.41      | 1.14 ± 0.44       | 0.61 (7.2)   |
| Glycated hemoglobin, %, median (IQR)                   | 5.9 (5.6-6.5)    | 5.9 (5.7-6.3)     | 0.98 (0.4)   |
| Hemoglobin, g/dL, median (IQR)                         | 13.8 (12.9-14.9) | 13.5 (12.5-14.2)  | 0.077 (25.5) |
| Leukocytes, /mm <sup>3</sup> , median (IQR)            | 8320 (6745-9865) | 8335 (6700-10680) | 0.55 (8.0)   |
| Neutrophils, /mm <sup>3</sup> , median (IQR)           | 5400 (4200-7400) | 5850 (4500-8150)  | 0.26 (16.0)  |
| Platelets, 1000/mm <sup>3</sup> , median (IQR)         | 235 (197-271)    | 234.5 (192-274)   | 0.88 (2.1)   |
| Prothrombin index, %, median (IQR)                     | 96 (88-100)      | 94 (86-100)       | 0.42 (11.3)  |
| Activated partial thromboplastin time, s, median (IQR) | 32 (29-35)       | 32 (28-37)        | 0.52 (8.6)   |
| C-reactive protein, mg/L, median (IQR)                 | 4.7 (2.0-9.7)    | 5.5 (2.5-9.7)     | 0.65 (7.1)   |
| Aspartate aminotransferase, U/L, median (IQR)          | 23 (19-29)       | 23 (20-27)        | 0.88 (2.2)   |
| Alanine aminotransferase, U/L, median (IQR)            | 21 (15-29)       | 18 (14-23)        | 0.029 (32.2) |

Data are expressed as number (%) unless otherwise indicated.

Abbreviations: ACE=angiotensin converting enzyme, ASD=absolute standardized difference, BMI= body mass index, HDL= high density lipoprotein, IQR=interquartile range, LDL=low density lipoprotein, NIHSS= National Institutes of Health Stroke Scale, SD=standard deviation, TIA=transient ischemic attack.

**Table 2. Outcomes at 8-day and 90-day after stroke according to prior benzodiazepine use In Propensity-Score-Matched Cohort.**

|                                     | Benzodiazepine users |              | Propensity-score –Matched† |          |
|-------------------------------------|----------------------|--------------|----------------------------|----------|
|                                     | No (n=56)            | Yes (n=56)*  | OR (95% CI)                | <i>p</i> |
| <b>Outcome at 8-day</b>             |                      |              |                            |          |
| All-cause death                     | 2/56 (4.3)           | 4/56 (6.8)   | 1.81 (0.23-13.90)          | 0.56     |
| NIHSS $\geq 6$                      | 19/51 (37.3)         | 20/51 (39.4) | 1.10 (0.46-2.60)           | 0.83     |
| Poor outcome (mRS $\geq 2$ )        | 33/54 (60.3)         | 34/54 (63.2) | 1.13 (0.48-2.66)           | 0.78     |
| Poor outcome (Barthel $< 95$ )      | 29/52 (55.3)         | 32/52 (61.2) | 1.28 (0.51-3.15)           | 0.59     |
| Cognitive impairment (MMSE $< 24$ ) | 13/37 (34.4)         | 10/35 (28.0) | 0.75 (0.24-2.34)           | 0.62     |
| <b>Outcome at 90-day</b>            |                      |              |                            |          |
| All-cause death                     | 4/53 (7.6)           | 12/52 (23.5) | 3.93 (0.91-16.98)          | 0.067    |
| Poor outcome (mRS $\geq 2$ )        | 25/53 (46.4)         | 31/52 (59.7) | 1.72 (0.75-3.91)           | 0.19     |
| Poor outcome (Barthel $< 95$ )      | 18/49 (36.0)         | 16/40 (39.6) | 1.18 (0.47-2.94)           | 0.72     |
| Cognitive impairment (MMSE $< 24$ ) | 6/37 (14.9)          | 5/33 (15.0)  | 1.04 (0.23-4.51)           | 0.96     |

Values are n/N (%) unless otherwise indicated, calculated after handling missing baseline data including in propensity-score calculation by multiple imputation procedure (m=20 imputed datasets; n were estimated using the combined rates and the mean number of patients without missing outcome values). \* mean numbers of matched pairs among the 20-imputed datasets. † calculated using a generalized estimating equations (GEE) model (binomial distribution, logit function) take into account the propensity-score matched design. Abbreviations: *MMSE*: Mini Mental State Examination, mRS: modified Rankin score, NIHSS: National Institutes of Health Stroke Scale, OR: odds ratio, CI: confidence interval.

**Table 3. Outcomes at 8-day and 90-day after stroke according to prior benzodiazepine use In Propensity-score adjusted Cohorts.**

|                                 | Benzodiazepine users |              | <i>p</i> | Propensity-score –adjusted* |          |
|---------------------------------|----------------------|--------------|----------|-----------------------------|----------|
|                                 | No                   | Yes          |          | OR (95% CI)                 | <i>p</i> |
| <b>Outcome at 8-day</b>         | (n=274)              | (n=62)       |          |                             |          |
| All-cause death                 | 6/274 (2.2)          | 5/62 (8.1)   | 0.034    | 2.53 (0.68-9.27)            | 0.16     |
| NIHSS $\geq 6$                  | 86/264 (32.58)       | 22/55 (40)   | 0.29     | 1.46 (0.77-2.75)            | 0.24     |
| Poor outcome (mRS $\geq 2$ )    | 137/270 (50.7)       | 39/60 (65.0) | 0.045    | 1.56(0.84-2.88)             | 0.15     |
| Poor outcome (Barthel <95)      | 119/265 (44.9)       | 35/56 (62.5) | 0.017    | 1.68 (0.90-3.14)            | 0.10     |
| Cognitive impairment (MMSE <24) | 52/196 (26.5)        | 11/40 (27.5) | 0.90     | 0.72 (0.31-1.62)            | 0.42     |
| <b>Outcome at 90-day</b>        | (n=258)              | (n=58)       |          |                             |          |
| All-cause death                 | 21/258 (8.1)         | 15/58 (25.9) | 0.0001   | 3.50 (1.57-7.76)            | 0.002    |
| Poor outcome (mRS $\geq 2$ )    | 110/258 (42.6)       | 35/58 (60.3) | 0.014    | 1.89 (1.02-3.48)            | 0.042    |
| Poor outcome (Barthel <95)      | 72/235 (30.6)        | 16/43 (37.2) | 0.39     | 1.31 (0.64-2.65)            | 0.45     |
| Cognitive impairment (MMSE <24) | 26/194 (13.4)        | 5/35 (14.3)  | 0.79     | 0.87 (0.29-2.55)            | 0.80     |

Values are n/N (%) unless otherwise indicated. \* logistic regression models adjusted on propensity score.

Abbreviations: *MMSE*: Mini Mental State Examination, mRS: modified Rankin score, NIHSS: National Institutes of Health Stroke Scale, OR: odds ratio, CI: confidence interval.



### **SOURCES OF FUNDING.**

This study was funded by the French Ministry of Health (as part of the PHRC programme).

### **AUTHORS' CONTRIBUTIONS**

OC wrote the manuscript and contributed to the analysis. JL performed statistical analysis and contributed to drafting the manuscript. JD contributed to drafting the manuscript. AMM contributed to study design and data collection. VD contributed to statistical analysis and contributed to drafting the manuscript. CC contributed to study design and data collection. DD contributed to study design, data collection and analysis. DL contributed to study design, data collection and analysis. RB contributed to study design, data collection and analysis, and drafting the manuscript. All authors have read and approved the final manuscript.

### **CONFLICTS OF INTEREST.**

The authors declare that they have no competing interests.

### **DATA SHARING STATEMENT**

No additional data are available.

**REFERENCES**

1. Lozano R, Naghavi M, Foreman K, et al. Global and regional mortality from 235 causes of death for 20 age groups in 1990 and 2010: a systematic analysis for the Global Burden of Disease Study 2010. *Lancet*. 2012; 380:2095–2128.
2. Deplanque D, Masse I, Lefebvre C, Libersa C, Leys D, Bordet R. Prior TIA, lipid-lowering drug use, and physical activity decrease ischemic stroke severity. *Neurology*. 2006; 67:1403–1410.
3. Marshall JW, Green AR, Ridley RM. Comparison of the neuroprotective effect of clomethiazole, AR-R15896AR and NXY-059 in a primate model of stroke using histological and behavioural measures. *Brain Research*. 2003; 972:119-26.
4. Nelson RM, Green AR, Lambert DG, Hainsworth AH. On the regulation of ischemia-induced glutamate efflux from rat cortex by GABA: in vitro studies with GABA, clomethiazole and pentobarbitone. *British Journal of Pharmacology*. 2000; 130:1124-30.
5. Liu J, Wang LN. Gamma aminobutyric acid (GABA) receptor agonists for acute stroke. *Cochrane Database Syst Rev*. 2014;8:CD009622.
6. Ducroquet A, Leys D, Al Saabi A, Richard F, Cordonnier C, Girot Marie et al. Influence of chronic ethanol consumption on the neurological severity in patients with acute cerebral ischemia. *Stroke*. 2013; 44:2324-6.
7. Austin PC. An Introduction to Propensity Score Methods for Reducing the Effects of Confounding in Observational Studies. *Multivar. Behav. Res*. 2011; 46:399–424.
8. Austin PC. A comparison of 12 algorithms for matching on the propensity score. *Stat. Med*. 2014; 33:1057–1069.

- 1  
2  
3 9. Austin PC. Optimal caliper widths for propensity-score matching when estimating  
4 differences in means and differences in proportions in observational studies. *Pharm*  
5 *Stat.* 2011; 10(2): 150–161.  
6  
7
- 8  
9 10. Austin PC. Balance diagnostics for comparing the distribution of baseline covariates  
10 between treatment groups in propensity-score matched samples. *Stat. Med.* 2009;  
11 28:3083–3107.  
12  
13
- 14 11. Mattei A. Estimating and using propensity score in presence of missing background  
15 data: an application to assess the impact of childbearing on wellbeing. *Stat. Methods*  
16 *Appl.* 2008;18:257–273.  
17  
18
- 19 12. Buuren S, Groothuis-Oudshoorn K. mice: Multivariate imputation by chained  
20 equations in R. *J. Stat. Softw.* [Internet]. 2011 [cited 2016 Feb 25];45. Available from:  
21 <http://doc.utwente.nl/78938>.  
22  
23
- 24 13. Rubin DB. Multiple imputation for nonresponse in surveys. New York: Wiley; 1987.  
25  
26
- 27 14. Frank B, Fulton RL, Lees KR, Sanders RD, VISTA Collaborators. Impact of  
28 benzodiazepines on functional outcome and occurrence of pneumonia in stroke:  
29 evidence from VISTA. *Int J Stroke.* 2014;9:890-4.  
30  
31
- 32 15. Weich S, Pearce HL, Croft P, Singh S, Crome I, Bashford J. Effect of anxiolytic and  
33 hypnotic drug prescriptions on mortality hazards: retrospective cohort study. *BMJ.*  
34 2014;348:g1996.  
35  
36
- 37 16. Palmaro A, Dupouy J, Lapeyre-Mestre ML. Benzodiazepines and risk of death: results  
38 from two large cohort studies in France and UK. *Eur Neuropsychopharmacol.*  
39 2015;25:1566-77.  
40  
41
- 42 17. Jennum P, Baandrup L, Iversen HK, Ibsen R, Kjellberg J. Mortality and use of  
43 psychotropic medication in patients with stroke: a population-wide, register-based  
44 study. *BMJ Open.* 2016;6:e010662.  
45  
46  
47  
48  
49  
50  
51  
52  
53  
54  
55  
56  
57  
58  
59  
60

- 1  
2  
3 18. Wu CK, Huang YT, Lee JK, Jimmy Juang JM, Tsai CT, Lai LP et al. Anti-anxiety  
4 drugs use and cardiovascular outcomes in patients with myocardial infarction: a  
5 national wide assessment. *Atherosclerosis*. 2014;235:496-502.  
6  
7
- 8  
9 19. Obiora E, Hubbard R, Sanders RD, Myles PR. The impact of benzodiazepines on  
10 occurrence of pneumonia and mortality from pneumonia: a nested case-control and  
11 survival analysis in a population-based cohort. *Thorax*. 2013; 68:163-70.  
12  
13
- 14 20. Billioti de Gage S, Bégaud B, Bazin F, Verdoux H, Dartigues JF, Pérès K et al.  
15 Benzodiazepine use and risk of dementia: prospective population-based study. *BMJ*.  
16 2012;345:e6231.  
17  
18
- 19 21. Airagnes G, Pelissolo A, Lavallée M et al. Benzodiazepine Misuse in the Elderly: Risk  
20 Factors, Consequences, and Management. *Curr Psychiatry Rep*. 2016 Oct;18(10):89.  
21  
22
- 23 22. House A, Knapp P, Bamford J, Vail A. Mortality at 12 and 24 months after stroke may  
24 be associated with depressive symptoms at 1 month. *Stroke*. 2001 Mar;32(3):696-701.  
25  
26
- 27 23. Forster A, Juge O, Morel D. Effects of midazolam on cerebral blood flow in human  
28 volunteers. *Anesthesiology*. 1982;56:453-5.  
29  
30
- 31 24. Bartlett E, Mikulis DJ. Chasing "chasing the dragon" with MRI: leukoencephalopathy  
32 in drug abuse. *British J Radiol*. 2005;78:997-1004.  
33  
34  
35  
36  
37  
38  
39  
40  
41  
42  
43  
44  
45  
46  
47  
48  
49  
50  
51  
52  
53  
54  
55  
56  
57  
58  
59  
60

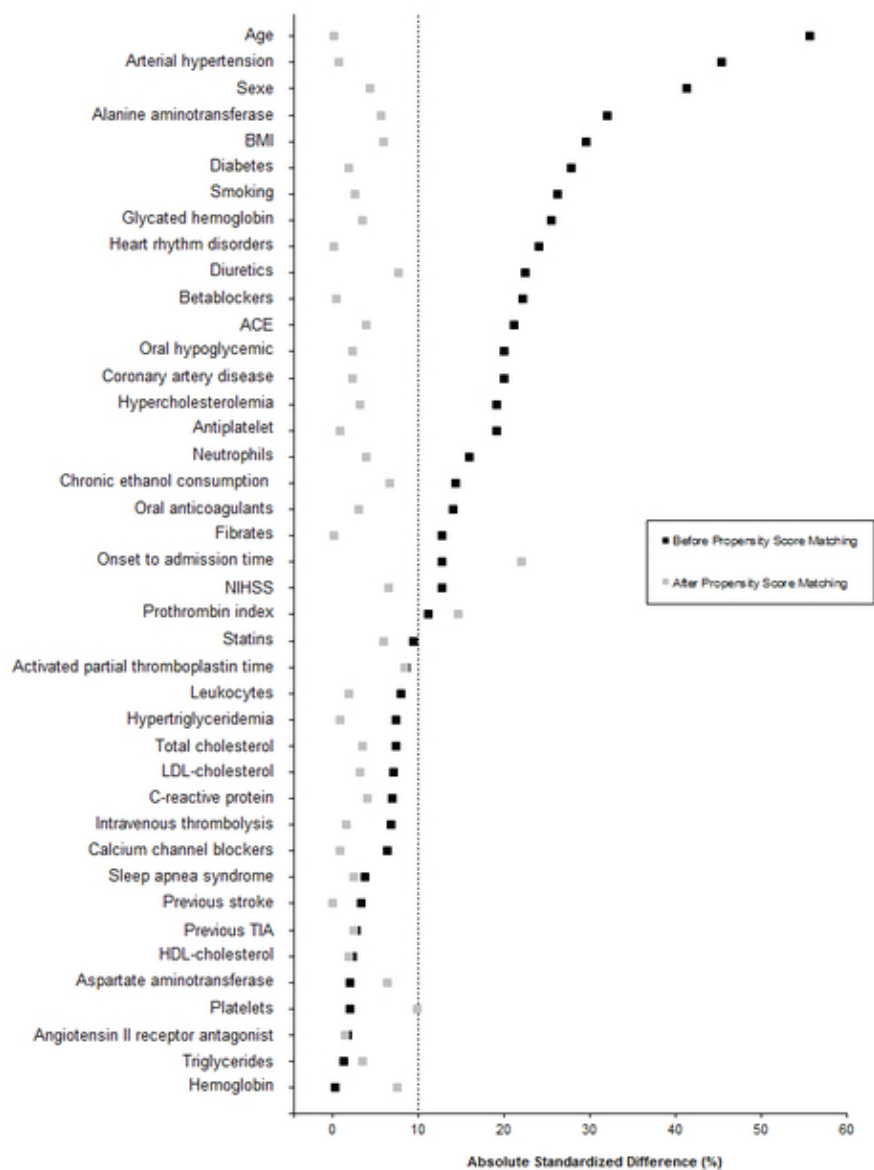

Figure 1. Absolute standardized differences between benzodiazepine users and non-users before and after propensity score matching.

40x53mm (300 x 300 DPI)

**ONLINE SUPPLEMENT.****Supplemental table 1. Main baseline characteristics and Outcomes of Overall Study population (N=336)**

|                                    | N   | Value       |
|------------------------------------|-----|-------------|
| <b>Demographic characteristics</b> |     |             |
| Age, y, mean±SD                    | 336 | 66.9 ± 14.9 |
| Men                                | 336 | 180 (53.6)  |
| <b>Medical history</b>             |     |             |
| Previous stroke                    | 335 | 35 (10.5)   |
| Previous TIA                       | 336 | 25 (7.4)    |
| Coronary artery disease            | 336 | 69 (20.5)   |
| Sleep apnea syndrome               | 333 | 9 (2.7)     |
| Heart rhythm disorders             | 335 | 79 (23.6)   |
| <b>Vascular risk factors</b>       |     |             |
| Arterial hypertension              | 336 | 203 (60.4)  |
| Diabetes mellitus                  | 336 | 66 (19.6)   |
| Hypercholesterolemia               | 336 | 158 (47.0)  |
| Hypertriglyceridemia               | 336 | 52 (15.5)   |
| Smoking                            | 336 | 102 (30.4)  |
| Chronic ethanol consumption        | 334 | 52 (15.6)   |
| BMI, kg/m <sup>2</sup> , mean±SD   | 312 | 26.8 ± 4.9  |
| <b>Routine drugs</b>               |     |             |
| Fibrates                           | 336 | 23 (6.9)    |
| Statins                            | 336 | 107 (31.9)  |
| Oral anticoagulants                | 336 | 19 (5.7)    |
| Antiplatelet                       | 336 | 126 (37.5)  |
| ACE                                | 336 | 63 (18.8)   |
| Angiotensin II receptor antagonist | 336 | 56 (16.7)   |
| Diuretics                          | 336 | 86 (25.6)   |

|                                                        |     |                   |
|--------------------------------------------------------|-----|-------------------|
| Calcium channel blockers                               | 336 | 53 (15.8)         |
| Betablockers                                           | 335 | 127 (37.9)        |
| Oral hypoglycemic                                      | 336 | 51 (15.2)         |
| Intravenous thrombolysis                               | 332 | 94 (28.3)         |
| Onset to admission time, hours, median (IQR)           | 332 | 2 (1-7)           |
| NIHSS, median (IQR)                                    | 336 | 6 (2-14)          |
| <b>Biological characteristics</b>                      |     |                   |
| Triglycerides, g/L, median (IQR)                       | 329 | 1.1 (0.8-1.6)     |
| Total cholesterol, g/L, mean±SD                        | 329 | 1.95 ± 0.50       |
| HDL-cholesterol, g/L, mean±SD                          | 321 | 0.53 ± 0.16       |
| LDL-cholesterol, g/L, mean±SD                          | 319 | 1.16 ± 0.41       |
| Glycated hemoglobin, %, median (IQR)                   | 245 | 5.9 (5.6-6.4)     |
| Hemoglobin, g/dL, median (IQR)                         | 335 | 13.7 (12.9-14.7)  |
| Leukocytes, /mm <sup>3</sup> , median (IQR)            | 334 | 8320 (6730-10130) |
| Neutrophils, /mm <sup>3</sup> , median (IQR)           | 315 | 5.6 (4.2-7.5)     |
| Platelets, 1000/mm <sup>3</sup> , median (IQR)         | 335 | 235 (195-272)     |
| Prothrombin index, %, median (IQR)                     | 320 | 95 (86-100)       |
| Activated partial thromboplastin time, s, median (IQR) | 333 | 32 (29-35)        |
| C-reactive protein, mg/L, median (IQR)                 | 280 | 4.9 (2-9.7)       |
| Aspartate aminotransferase, U/L, median (IQR)          | 321 | 23 (19-28)        |
| Alanine aminotransferase, U/L, median (IQR)            | 322 | 20 (15-28)        |
| <b>Outcome at 8-day</b>                                |     |                   |
| All-cause death                                        | 336 | 11 (3.3)          |
| NIHSS ≥6                                               | 319 | 108 (33.9)        |
| Poor outcome (mRS ≥2)                                  | 330 | 176 (53.3)        |
| Poor outcome (Barthel <95)                             | 321 | 154 (48.0)        |
| Cognitive impairment (MMSE <24)                        | 236 | 63 (26.7)         |
| <b>Outcome at 90-day</b>                               |     |                   |
| All-cause death                                        | 316 | 36 (11.4)         |
| Poor outcome (mRS ≥2)                                  | 316 | 145 (45.9)        |

|                                 |     |           |
|---------------------------------|-----|-----------|
| Poor outcome (Barthel <95)      | 278 | 88 (31.7) |
| Cognitive impairment (MMSE <24) | 229 | 31 (13.5) |

Abbreviations: ACE=angiotensin converting enzyme, ASD=absolute standardized difference, BMI= body mass index, HDL= high density lipoprotein, IQR=interquartile range, LDL=low density lipoprotein, MMSE: Mini Mental State Examination, mRS: modified Rankin score, NIHSS= National Institutes of Health Stroke Scale, SD=standard deviation, TIA=transient ischemic attack

For peer review only



**Supplemental Table 2. Baseline characteristics in benzodiazepine users and non-users after propensity-score matching.**

|                                    | Benzodiazepine<br>non-users (n=56) * | Benzodiazepine<br>users (n=56) * | ASD, % |
|------------------------------------|--------------------------------------|----------------------------------|--------|
| <b>Demographic characteristics</b> |                                      |                                  |        |
| Age, y, mean±SD                    | 72.6 ± 14.9                          | 72.6 ± 12.6                      | 0.2    |
| Men                                | 24 (42.6)                            | 23 (40.4)                        | 4.5    |
| <b>Medical history</b>             |                                      |                                  |        |
| Previous stroke                    | 6 (9.9)                              | 5 (9.7)                          | 0.1    |
| Previous TIA                       | 5 (8.1)                              | 4 (7.2)                          | 2.6    |
| Coronary artery disease            | 13 (23.7)                            | 14 (24.6)                        | 2.4    |
| Sleep apnea syndrome               | 2 (4.2)                              | 2 (3.6)                          | 2.5    |
| Heart rhythm disorders             | 16 (29.3)                            | 16 (29.3)                        | 0.2    |
| <b>Vascular risk factors</b>       |                                      |                                  |        |
| Arterial hypertension              | 43 (77.1)                            | 43 (76.8)                        | 0.8    |
| Diabetes mellitus                  | 7 (13.2)                             | 7 (12.3)                         | 5.7    |
| Hypercholesterolemia               | 30 (54.0)                            | 29 (52.3)                        | 3.3    |
| Hypertriglyceridemia               | 9 (16.5)                             | 9 (16.8)                         | 1.0    |
| Smoking                            | 13 (23.3)                            | 12 (21.9)                        | 2.7    |
| Chronic ethanol consumption        | 9 (15.6)                             | 7 (13.0)                         | 6.7    |
| BMI, kg/m <sup>2</sup> , mean±SD   | 26.2 ± 5.7                           | 25.9 ± 5.3                       | 6.0    |
| <b>Routine drugs</b>               |                                      |                                  |        |
| Fibrates                           | 6 (10.8)                             | 6 (10.7)                         | 0.2    |
| Statins                            | 19 (34.6)                            | 18 (31.7)                        | 6.0    |
| Oral anticoagulants                | 19 (34.6)                            | 18 (31.7)                        | 3.1    |
| Antiplatelet                       | 24 (43.1)                            | 24 (42.6)                        | 1.1    |
| ACE                                | 15 (26.3)                            | 14 (24.5)                        | 4.0    |
| Angiotensin II receptor antagonist | 9 (16.9)                             | 10 (17.4)                        | 1.5    |
| Diuretics                          | 18 (31.9)                            | 20 (35.4)                        | 7.7    |

|                                                        |                  |                   |      |
|--------------------------------------------------------|------------------|-------------------|------|
| Calcium channel blockers                               | 10 (18.0)        | 10 (17.6)         | 1.0  |
| Betablockers                                           | 26 (46.0)        | 26 (45.8)         | 0.5  |
| Oral hypoglycemic                                      | 6 (11.5)         | 6 (10.6)          | 2.4  |
| Intravenous thrombolysis                               | 16 (27.8)        | 15 (27.0)         | 1.6  |
| Onset to admission time, hours, median (IQR)           | 2 (1-8)          | 2 (1-3)           | 22.0 |
| NIHSS, median (IQR)                                    | 8 (2-17)         | 6 (2-18)          | 6.7  |
| <b>Biological characteristics</b>                      |                  |                   |      |
| Triglycerides, g/L, median (IQR)                       | 1.02 (0.81-1.54) | 1.02 (0.82-1.58)  | 3.6  |
| Total cholesterol, g/L, mean±SD                        | 1.93 ± 0.57      | 1.91 ± 0.52       | 3.5  |
| HDL-cholesterol, g/L, mean±SD                          | 0.54 ± 0.20      | 0.53 ± 0.14       | 2.0  |
| LDL-cholesterol, g/L, mean±SD                          | 1.14 ± 0.48      | 1.13 ± 0.45       | 3.3  |
| Glycated hemoglobin, %, median (IQR)                   | 6.0 (5.7-6.4)    | 5.9 (5.7-6.3)     | 3.5  |
| Hemoglobin, g/dL, median (IQR)                         | 13.4 (12.4-14.6) | 13.5 (12.4-14.2)  | 7.5  |
| Leukocytes, /mm <sup>3</sup> , median (IQR)            | 8473 (6919-9884) | 8276 (6590-10597) | 1.9  |
| Neutrophils, /mm <sup>3</sup> , median (IQR)           | 5.7 (4.3-7.6)    | 5.7 (4.1-8.2)     | 4.0  |
| Platelets, 1000/mm <sup>3</sup> , median (IQR)         | 240 (206-277)    | 236 (198-274)     | 9.9  |
| Prothrombin index, %, median (IQR)                     | 95 (86-100)      | 92 (84-100)       | 14.8 |
| Activated partial thromboplastin time, s, median (IQR) | 32 (29-36)       | 31 (28-36)        | 8.5  |
| C-reactive protein, mg/L, median (IQR)                 | 5.7 (2.5-9.6)    | 5.8 (2.6-9.7)     | 4.2  |
| Aspartate aminotransferase, U/L, median (IQR)          | 23 (19-27)       | 23 (20-28)        | 6.4  |
| Alanine aminotransferase, U/L, median (IQR)            | 18 (14-24)       | 18 (14-23)        | 5.7  |

Data are expressed as number (%) unless otherwise indicated. Descriptive parameters and ASD were calculated after handling missing baseline data including in propensity-score calculation by multiple imputation procedure (m=20 imputed datasets). \* mean numbers of matched pairs among the 20-imputed datasets.

Abbreviations: ACE=angiotensin converting enzyme, ASD=absolute standardized difference, BMI= body mass index, HDL= high density lipoprotein, IQR=interquartile range, LDL=low density lipoprotein, NIHSS= National Institutes of Health Stroke Scale, SD=standard deviation, TIA=transient ischemic attack.

**Supplemental table 3. Main baseline characteristics of patients loss and not loss at 90-day**

|                                  | 90-day follow-up |             |
|----------------------------------|------------------|-------------|
|                                  | Yes (n=316)      | No (n=20)   |
| Number of patients               | 316              | 20          |
| Benzodiazepine use               | 58 (18.3)        | 4 (20.0)    |
| Age, y, mean±SD                  | 66.6 ± 14.9      | 71.5 ± 12.9 |
| Men                              | 170 (53.8)       | 10 (50.0)   |
| Medical history                  |                  |             |
| Previous stroke                  | 32 (10.1)        | 3 (15.8)    |
| Previous TIA                     | 24 (7.6)         | 1 (5.0)     |
| Coronary artery disease          | 63 (19.9)        | 6 (30.0)    |
| Sleep apnea syndrome             | 9 (2.9)          | 0 (0.0)     |
| Heart rhythm disorders           | 75 (23.8)        | 4 (20.0)    |
| Vascular risk factors            |                  |             |
| Arterial hypertension            | 190 (60.1)       | 13 (65.0)   |
| Diabetes mellitus                | 61 (19.3)        | 5 (25.0)    |
| Hypercholesterolemia             | 149 (47.1)       | 9 (45.0)    |
| Hypertriglyceridemia             | 51 (16.1)        | 1 (5.0)     |
| Smoking                          | 94 (19.7)        | 8 (40.0)    |
| Chronic ethanol consumption      | 49 (15.6)        | 3 (15.0)    |
| BMI, kg/m <sup>2</sup> , mean±SD | 26.8 ± 5.0       | 25.5 ± 3.9  |

Data are expressed as number (%) unless otherwise indicated.

Abbreviations: BMI= body mass index, SD=standard deviation, TIA=transient ischemic attack.

**Supplemental table 4. Individual characteristics of the 36 mortality cases during the 90-day follow-up period after stroke onset.**

| Patients | Benzodiazepines | Age | Gender | NHSS | Hypertension | Diabetes | Hypercholesterolemia | Smoking | Previous Stroke |
|----------|-----------------|-----|--------|------|--------------|----------|----------------------|---------|-----------------|
| 1        | No              | 87  | Women  | 22   | Yes          | Yes      | No                   | No      | No              |
| 2        | No              | 52  | Women  | 6    | Yes          | No       | Yes                  | Yes     | Yes             |
| 3        | No              | 39  | Women  | 15   | Yes          | No       | No                   | Yes     | No              |
| 4        | No              | 80  | Men    | 11   | Yes          | Yes      | Yes                  | Yes     | Yes             |
| 5        | No              | 72  | Men    | 10   | No           | No       | No                   | Yes     | No              |
| 6        | No              | 82  | Men    | 20   | No           | No       | No                   | No      | No              |
| 7        | No              | 82  | Women  | 21   | No           | Yes      | No                   | No      | No              |
| 8        | No              | 85  | Women  | 22   | Yes          | No       | No                   | No      | Yes             |
| 9        | No              | 89  | Women  | 26   | No           | No       | No                   | No      | No              |
| 10       | No              | 81  | Women  | 20   | Yes          | Yes      | Yes                  | No      | No              |
| 11       | No              | 71  | Men    | 8    | Yes          | Yes      | Yes                  | Yes     | No              |
| 12       | No              | 63  | Men    | 19   | Yes          | No       | No                   | No      | No              |
| 13       | No              | 43  | Women  | 11   | No           | No       | No                   | Yes     | No              |
| 14       | No              | 79  | Men    | 11   | No           | No       | No                   | No      | No              |
| 15       | No              | 44  | Women  | 7    | No           | No       | No                   | Yes     | No              |
| 16       | No              | 39  | Men    | 18   | No           | No       | No                   | No      | No              |
| 17       | No              | 38  | Men    | 0    | No           | No       | No                   | Yes     | No              |
| 18       | No              | 65  | Men    | 19   | No           | No       | No                   | Yes     | No              |
| 19       | No              | 46  | Men    | 8    | Yes          | No       | Yes                  | Yes     | No              |
| 20       | No              | 70  | Women  | 8    | Yes          | Yes      | Yes                  | No      | No              |
| 21       | No              | 48  | Women  | 17   | Yes          | No       | No                   | No      | No              |
| 22       | Yes             | 85  | Men    | 21   | No           | No       | No                   | No      | No              |
| 23       | Yes             | 53  | Men    | 27   | No           | No       | No                   | Yes     | No              |
| 24       | Yes             | 84  | Women  | 32   | Yes          | No       | Yes                  | No      | Yes             |
| 25       | Yes             | 84  | Men    | 22   | Yes          | No       | Yes                  | No      | No              |
| 26       | Yes             | 85  | Women  | 27   | Yes          | No       | Yes                  | No      | No              |
| 27       | Yes             | 93  | Women  | 21   | Yes          | No       | Yes                  | No      | No              |
| 28       | Yes             | 60  | Men    | 1    | Yes          | No       | Yes                  | No      | No              |
| 29       | Yes             | 86  | Women  | 25   | Yes          | No       | Yes                  | No      | No              |
| 30       | Yes             | 76  | Women  | 20   | Yes          | Yes      | No                   | No      | No              |
| 31       | Yes             | 66  | Women  | 17   | Yes          | No       | No                   | No      | No              |
| 32       | Yes             | 71  | Women  | 13   | Yes          | No       | Yes                  | No      | No              |
| 33       | Yes             | 83  | Women  | 1    | Yes          | No       | Yes                  | No      | No              |
| 34       | Yes             | 81  | Men    | 1    | No           | No       | Yes                  | No      | Yes             |
| 35       | Yes             | 83  | Women  | 11   | Yes          | No       | Yes                  | Yes     | No              |
| 36       | Yes             | 63  | Women  | 0    | Yes          | No       | No                   | No      | No              |

**Supplemental table 5. Main baseline characteristics of alive patients with and without missing MMSE at 8- and 90-days**

|                                  | 8-day MMSE  |             | 90-day MMSE |             |
|----------------------------------|-------------|-------------|-------------|-------------|
|                                  | Not missing | Missing     | Not missing | Missing     |
| Number of patients               | 236         | 89          | 229         | 71          |
| Benzodiazepine use               | 40 (16.9)   | 17 (19.1)   | 35 (15.3)   | 12 (16.9)   |
| Age, y, mean±SD                  | 65.2 ± 14.4 | 70.3 ± 15.2 | 65.5 ± 14.9 | 69.8 ± 13.3 |
| Men                              | 132 (55.9)  | 45 (50.6)   | 128 (55.9)  | 37 (52.1)   |
| Medical history                  |             |             |             |             |
| Previous stroke                  | 22 (9.3)    | 10 (11.4)   | 22 (9.6)    | 8 (11.4)    |
| Previous TIA                     | 16 (6.8)    | 9 (10.1)    | 14 (6.1)    | 7 (9.9)     |
| Coronary artery disease          | 40 (16.9)   | 26 (29.2)   | 44 (19.2)   | 14 (19.7)   |
| Sleep apnea syndrome             | 6 (2.6)     | 3 (3.4)     | 4 (1.8)     | 4 (5.7)     |
| Heart rhythm disorders           | 51 (21.6)   | 24 (27.3)   | 52 (22.8)   | 19 (26.8)   |
| Vascular risk factors            |             |             |             |             |
| Arterial hypertension            | 137 (58.0)  | 57 (64.0)   | 138 (60.3)  | 42 (59.1)   |
| Diabetes mellitus                | 44 (18.6)   | 19 (21.3)   | 47 (20.5)   | 12 (16.9)   |
| Hypercholesterolemia             | 107 (45.3)  | 47 (52.8)   | 111 (48.5)  | 31 (43.7)   |
| Hypertriglyceridemia             | 41 (17.4)   | 10 (11.2)   | 40 (17.5)   | 8 (11.3)    |
| Smoking                          | 81 (34.3)   | 18 (20.2)   | 67 (29.3)   | 23 (32.4)   |
| Chronic ethanol consumption      | 39 (16.7)   | 13 (14.6)   | 38 (16.6)   | 13 (18.6)   |
| BMI, kg/m <sup>2</sup> , mean±SD | 26.7 ± 4.8  | 27.0 ± 5.1  | 26.8 ± 4.8  | 26.6 ± 5.0  |

Data are expressed as number (%) unless otherwise indicated.

Abbreviations: BMI= body mass index, SD=standard deviation, TIA=transient ischemic attack.

## STROBE Statement—checklist of items that should be included in reports of observational studies

|                              | Item No | Recommendation                                                                                                                                                                                                                                                                                                                                                                                                                                                                        |
|------------------------------|---------|---------------------------------------------------------------------------------------------------------------------------------------------------------------------------------------------------------------------------------------------------------------------------------------------------------------------------------------------------------------------------------------------------------------------------------------------------------------------------------------|
| <b>Title and abstract</b>    | 1       | (a) Indicate the study's design with a commonly used term in the title or the abstract <a href="#">Page 2</a><br>(b) Provide in the abstract an informative and balanced summary of what was done and what was found ( <a href="#">Page 2</a> )                                                                                                                                                                                                                                       |
| <b>Introduction</b>          |         |                                                                                                                                                                                                                                                                                                                                                                                                                                                                                       |
| Background/rationale         | 2       | Explain the scientific background and rationale for the investigation being reported <a href="#">Page 4</a>                                                                                                                                                                                                                                                                                                                                                                           |
| Objectives                   | 3       | State specific objectives, including any prespecified hypotheses <a href="#">Page 4</a>                                                                                                                                                                                                                                                                                                                                                                                               |
| <b>Methods</b>               |         |                                                                                                                                                                                                                                                                                                                                                                                                                                                                                       |
| Study design                 | 4       | Present key elements of study design early in the paper ( <a href="#">page 5</a> )                                                                                                                                                                                                                                                                                                                                                                                                    |
| Setting                      | 5       | Describe the setting, locations, and relevant dates, including periods of recruitment, exposure, follow-up, and data collection ( <a href="#">page 5</a> )                                                                                                                                                                                                                                                                                                                            |
| Participants                 | 6       | <i>Cohort study</i> —Give the eligibility criteria, and the sources and methods of selection of participants. Describe methods of follow-up ( <a href="#">page 5</a> )<br>(b) <i>Cohort study</i> —For matched studies, give matching criteria and number of exposed and unexposed (NA)                                                                                                                                                                                               |
| Variables                    | 7       | Clearly define all outcomes, exposures, predictors, potential confounders, and effect modifiers. Give diagnostic criteria, if applicable ( <a href="#">page 5</a> )                                                                                                                                                                                                                                                                                                                   |
| Data sources/<br>measurement | 8*      | For each variable of interest, give sources of data and details of methods of assessment (measurement). Describe comparability of assessment methods if there is more than one group ( <a href="#">page 5-6</a> )                                                                                                                                                                                                                                                                     |
| Bias                         | 9       | Describe any efforts to address potential sources of bias (NA)                                                                                                                                                                                                                                                                                                                                                                                                                        |
| Study size                   | 10      | Explain how the study size was arrived ( <a href="#">page 5</a> )                                                                                                                                                                                                                                                                                                                                                                                                                     |
| Quantitative variables       | 11      | Explain how quantitative variables were handled in the analyses. If applicable, describe which groupings were chosen and why ( <a href="#">page 6</a> )                                                                                                                                                                                                                                                                                                                               |
| Statistical methods          | 12      | (a) Describe all statistical methods, including those used to control for confounding ( <a href="#">page 6</a> )<br>(b) Describe any methods used to examine subgroups and interactions ( <a href="#">page 6</a> )<br>(c) Explain how missing data were addressed ( <a href="#">pages 6-7</a> )<br>(d) <i>Cohort study</i> —If applicable, explain how loss to follow-up was addressed ( <a href="#">page 6</a> )<br>(e) Describe any sensitivity analyses ( <a href="#">page 6</a> ) |

Continued on next page

**Results**

|                  |     |                                                                                                                                                                                                                                                                                                                                                                                                                                                                                        |
|------------------|-----|----------------------------------------------------------------------------------------------------------------------------------------------------------------------------------------------------------------------------------------------------------------------------------------------------------------------------------------------------------------------------------------------------------------------------------------------------------------------------------------|
| Participants     | 13* | (a) Report numbers of individuals at each stage of study—eg numbers potentially eligible, examined for eligibility, confirmed eligible, included in the study, completing follow-up, and analysed ( <a href="#">page 8</a> )<br>(b) Give reasons for non-participation at each stage ( <a href="#">page 8</a> )<br>(c) Consider use of a flow diagram (NA)                                                                                                                             |
| Descriptive data | 14* | (a) Give characteristics of study participants (eg demographic, clinical, social) and information on exposures and potential confounders ( <a href="#">page 8; 15-16</a> )<br>(b) Indicate number of participants with missing data for each variable of interest ( <a href="#">page 8; 15-16</a> )<br>(c) <i>Cohort study</i> —Summarise follow-up time (eg, average and total amount) ( <a href="#">page 8; 15-16</a> )                                                              |
| Outcome data     | 15* | <i>Cohort study</i> —Report numbers of outcome events or summary measures over time ( <a href="#">page 8;17</a> )                                                                                                                                                                                                                                                                                                                                                                      |
| Main results     | 16  | (a) Give unadjusted estimates and, if applicable, confounder-adjusted estimates and their precision (eg, 95% confidence interval). Make clear which confounders were adjusted for and why they were included ( <a href="#">page 8; 15-17</a> )<br>(b) Report category boundaries when continuous variables were categorized ( <a href="#">page 8; 15-17</a> )<br>(c) If relevant, consider translating estimates of relative risk into absolute risk for a meaningful time period (NA) |
| Other analyses   | 17  | Report other analyses done—eg analyses of subgroups and interactions, and sensitivity analyses ( <a href="#">suppl file</a> )                                                                                                                                                                                                                                                                                                                                                          |

**Discussion**

|                  |    |                                                                                                                                                                                                        |
|------------------|----|--------------------------------------------------------------------------------------------------------------------------------------------------------------------------------------------------------|
| Key results      | 18 | Summarise key results with reference to study objectives ( <a href="#">page 10</a> )                                                                                                                   |
| Limitations      | 19 | Discuss limitations of the study, taking into account sources of potential bias or imprecision. Discuss both direction and magnitude of any potential bias ( <a href="#">page 10-12</a> )              |
| Interpretation   | 20 | Give a cautious overall interpretation of results considering objectives, limitations, multiplicity of analyses, results from similar studies, and other relevant evidence ( <a href="#">page 13</a> ) |
| Generalisability | 21 | Discuss the generalisability (external validity) of the study results ( <a href="#">pages 13-14</a> )                                                                                                  |

**Other information**

|         |    |                                                                                                                                                                                           |
|---------|----|-------------------------------------------------------------------------------------------------------------------------------------------------------------------------------------------|
| Funding | 22 | Give the source of funding and the role of the funders for the present study and, if applicable, for the original study on which the present article is based ( <a href="#">page 18</a> ) |
|---------|----|-------------------------------------------------------------------------------------------------------------------------------------------------------------------------------------------|

\*Give information separately for cases and controls in case-control studies and, if applicable, for exposed and unexposed groups in cohort and cross-sectional studies.

**Note:** An Explanation and Elaboration article discusses each checklist item and gives methodological background and published examples of transparent reporting. The STROBE checklist is best used in conjunction with this article (freely available on the Web sites of PLoS Medicine at <http://www.plosmedicine.org/>, Annals of Internal Medicine at <http://www.annals.org/>, and Epidemiology at <http://www.epidem.com/>). Information on the STROBE Initiative is available at [www.strobe-statement.org](http://www.strobe-statement.org).

# BMJ Open

## Preadmission use of benzodiazepines and stroke outcomes: the Biostroke prospective cohort study.

|                                 |                                                                                                                                                                                                                                                                                                                                                                                                                                                                                                                                                                                                                                                                                                                                                                                                                                                                                                                                                                                                                                                                                                                                                                                                                                                                                                           |
|---------------------------------|-----------------------------------------------------------------------------------------------------------------------------------------------------------------------------------------------------------------------------------------------------------------------------------------------------------------------------------------------------------------------------------------------------------------------------------------------------------------------------------------------------------------------------------------------------------------------------------------------------------------------------------------------------------------------------------------------------------------------------------------------------------------------------------------------------------------------------------------------------------------------------------------------------------------------------------------------------------------------------------------------------------------------------------------------------------------------------------------------------------------------------------------------------------------------------------------------------------------------------------------------------------------------------------------------------------|
| Journal:                        | <i>BMJ Open</i>                                                                                                                                                                                                                                                                                                                                                                                                                                                                                                                                                                                                                                                                                                                                                                                                                                                                                                                                                                                                                                                                                                                                                                                                                                                                                           |
| Manuscript ID                   | bmjopen-2018-022720.R2                                                                                                                                                                                                                                                                                                                                                                                                                                                                                                                                                                                                                                                                                                                                                                                                                                                                                                                                                                                                                                                                                                                                                                                                                                                                                    |
| Article Type:                   | Research                                                                                                                                                                                                                                                                                                                                                                                                                                                                                                                                                                                                                                                                                                                                                                                                                                                                                                                                                                                                                                                                                                                                                                                                                                                                                                  |
| Date Submitted by the Author:   | 24-Oct-2018                                                                                                                                                                                                                                                                                                                                                                                                                                                                                                                                                                                                                                                                                                                                                                                                                                                                                                                                                                                                                                                                                                                                                                                                                                                                                               |
| Complete List of Authors:       | Colin, Olivier; Univ Lille; Inserm ; CHU Lille ; UMR-S 1171 "Degenerative and Vascular Cognitive Disorders", F59000-Lille, France.;<br>2. Univ Poitiers, Centre d'Investigation Clinique CIC1402 INSERM & Neurology Unit, CHU Poitiers, CS90577, 86021, Poitiers Cedex, France.<br>Labreuche, Julien; Univ Lille; Inserm ; CHU Lille ; EA2694, F59000-Lille, France.<br>Deguil, Julie; Univ Lille; Inserm ; CHU Lille ; UMR-S 1171 "Degenerative and Vascular Cognitive Disorders", F59000-Lille, France.<br>Mendyk, Anne Marie ; Univ Lille; Inserm ; CHU Lille ; UMR-S 1171 "Degenerative and Vascular Cognitive Disorders", F59000-Lille, France.<br>Deken , Valerie; Univ Lille; Inserm ; CHU Lille ; EA2694, F59000-Lille, France.<br>Cordonnier, Charlotte; Univ Lille; Inserm ; CHU Lille ; UMR-S 1171 "Degenerative and Vascular Cognitive Disorders", F59000-Lille, France.<br>Deplanque, Dominique; Univ Lille; Inserm ; CHU Lille ; UMR-S 1171 "Degenerative and Vascular Cognitive Disorders", F59000-Lille, France.<br>Leys, Didier; Univ Lille; Inserm ; CHU Lille ; UMR-S 1171 "Degenerative and Vascular Cognitive Disorders", F59000-Lille, France.<br>Bordet, Régis; Univ Lille; Inserm ; CHU Lille ; UMR-S 1171 "Degenerative and Vascular Cognitive Disorders", F59000-Lille, France. |
| <b>Primary Subject Heading</b>: | Neurology                                                                                                                                                                                                                                                                                                                                                                                                                                                                                                                                                                                                                                                                                                                                                                                                                                                                                                                                                                                                                                                                                                                                                                                                                                                                                                 |
| Secondary Subject Heading:      | Pharmacology and therapeutics, Public health                                                                                                                                                                                                                                                                                                                                                                                                                                                                                                                                                                                                                                                                                                                                                                                                                                                                                                                                                                                                                                                                                                                                                                                                                                                              |
| Keywords:                       | Stroke < NEUROLOGY, mortality, benzodiazepines                                                                                                                                                                                                                                                                                                                                                                                                                                                                                                                                                                                                                                                                                                                                                                                                                                                                                                                                                                                                                                                                                                                                                                                                                                                            |
|                                 |                                                                                                                                                                                                                                                                                                                                                                                                                                                                                                                                                                                                                                                                                                                                                                                                                                                                                                                                                                                                                                                                                                                                                                                                                                                                                                           |

SCHOLARONE™  
Manuscripts



1  
2  
3 **Preadmission use of benzodiazepines and stroke outcomes: the Biostroke prospective cohort**  
4  
5 **study.**  
6

7  
8 Olivier Colin, MD<sup>1,2</sup>; Julien Labreuche, MD<sup>3</sup>; Julie Deguil, PhD<sup>1</sup>; Anne-Marie Mendyk<sup>1</sup>; Valérie  
9 Deken<sup>3</sup>; Charlotte Cordonnier, MD, PhD<sup>1</sup>; Dominique Deplanque MD, PhD<sup>1</sup>; Didier Leys MD,  
10 PhD<sup>1</sup>, Régis Bordet MD, PhD<sup>1</sup>.  
11  
12  
13  
14  
15

- 16  
17 1. Univ Lille; Inserm ; CHU Lille ; UMR-S 1171 “Degenerative and Vascular Cognitive  
18 Disorders”, F59000-Lille, France.  
19  
20 2. Univ Poitiers, Centre d'Investigation Clinique CIC1402 INSERM & Neurology Unit,  
21 CHU Poitiers, CS90577, 86021, Poitiers Cedex, France.  
22  
23 3. Univ Lille; Inserm ; CHU Lille ; EA2694, F59000-Lille, France.  
24  
25  
26  
27  
28  
29  
30

31 Corresponding author: Olivier Colin, Centre Hospitalier Universitaire de Poitiers, Neurology  
32 Unit, CS90577, 86021, Poitiers Cedex, France; 00335494446, fax: 0033549443856, e-mail :  
33 [olivier.colin@chu-poitiers.fr](mailto:olivier.colin@chu-poitiers.fr)  
34  
35  
36  
37  
38

39 List of figures and tables:  
40  
41

42 Figure 1. Absolute standardized differences between benzodiazepine users and non-users before  
43 and after propensity score matching.  
44  
45

46 Table 1. Comparison of baseline characteristics between benzodiazepine users and non-users.  
47  
48

49 Table 2. Outcomes at 8-day and 90-day after stroke according to prior benzodiazepine use in  
50 propensity-score-matched cohort.  
51  
52

53 Table 3. Outcomes at 8-day and 90-day after stroke according to prior benzodiazepine use in  
54 propensity-score adjusted cohorts.  
55  
56  
57  
58  
59  
60

1  
2  
3  
4  
5  
6  
7 Key words: benzodiazepines; stroke; mortality.  
8  
9

10 Subject terms: stroke: ischemic stroke; quality and outcomes: mortality/survival; epidemiology,  
11  
12 lifestyle, and prevention: risk factors.  
13  
14  
15  
16  
17  
18  
19  
20  
21  
22  
23  
24  
25  
26  
27  
28  
29  
30  
31  
32  
33  
34  
35  
36  
37  
38  
39  
40  
41  
42  
43  
44  
45  
46  
47  
48  
49  
50  
51  
52  
53  
54  
55  
56  
57  
58  
59  
60

**ABSTRACT.**

**Objectives.** We tested the hypothesis that stroke outcomes in patients with preadmission use of benzodiazepine are worse.

**Method.** In a prospective cohort study, we recruited patients with acute ischemic stroke. Mortality, functional outcomes and cognition were evaluated at 8 and 90 days after stroke.

**Results.** 370 patients were included. 62 (18.5%) of 336 remainder patients were treated with benzodiazepines when stroke occurred, and they did not receive any other psychotropic drug. The mortality rate was higher in benzodiazepines users than non-users at day-8 (2.2% vs. 8.1%,  $p=0.034$ ) and day-90 (8.1% vs. 25.9%,  $p=0.0001$ ). After controlling for baseline differences using propensity-score matching, only the difference in mortality rate at 90-day was of borderline of significance, with a matched OR of 3.93 (95%IC, 0.91-16.98). In adjusted-propensity-score cohort, this difference remained significant with a similar treatment effect size (adjusted OR, 3.50; 95%CI, 1.57-7.76). A higher rate of poor functional outcome at day-8 and day-90 defined by  $mRS \geq 2$  or by the  $BI < 95$  was found in benzodiazepines users. In propensity-score adjusted cohort, only the difference in  $mRS \geq 2$  at 90-day remained significant (adjusted OR, 1.89; 95%CI, 1.02-3.48). In survivors at day-8 and at day-90, there was no significant difference in cognitive evaluation.

**Conclusion:** Our study has shown that preadmission use of benzodiazepines could be associated with increased post-stroke mortality at 90 days. These findings do not support a putative neuroprotective effect of GABA<sub>A</sub> receptors agonists and should alert clinicians of their potential risks. (clinicaltrials.gov: NCT00763217)

## STRENGTHS AND LIMITATIONS OF THIS STUDY

- This cohort study has a great potential with regards to public health in the field of stroke outcomes, as benzodiazepines are one of the most prescribed drugs in the world.
- These results are consistent with those from the literature of a non-neuroprotective effect of benzodiazepines.
- These results might be confounded by indication bias (between benzodiazepines users and non-users) but the use of a propensity score matching/adjustment partially addresses this concern.
- There is a lack of consistency of results for mortality and functional outcomes of stroke, suggesting new experimental approaches, to provide and appropriate mechanistic explanation.
- Our results should be interpreted as hypothesis generating (without possibility of concluding that there is a causal effect) and should be replicated in further studies.

## INTRODUCTION.

Stroke is the second most common cause of death and the third most common cause of disability-adjusted life-years worldwide.<sup>1</sup> Considering the long-term neurological disabilities which may result from acute stroke, and differences in the extent of recovery among stroke survivors, predicting the outcomes of stroke is a very important issue.<sup>1</sup> A wide variety of factors influence stroke prognosis, including age, stroke severity, comorbid conditions, clinical findings...<sup>2</sup> Knowledge of others factors - as pharmacologic and use of drugs - that could influence the severity and short-term outcomes of stroke prognosis is necessary for clinicians. For example, benzodiazepines have been first considered as a type of neuroprotective agent in reducing infarct size and improving functional outcome in animal models of cerebral ischaemia.<sup>3,4</sup> However, in humans, a recent review does not provide the evidence to support the use of benzodiazepines (GABA receptor agonists) for the treatment of patients with acute ischaemic stroke.<sup>5</sup> Benzodiazepines and ethanol share several central effects, especially on activation of inhibitory  $\gamma$  amino-butyric acid<sub>A</sub> (GABA<sub>A</sub>) receptors in the brain. We have recently shown that excessive chronic ethanol consumption is associated with higher stroke severity.<sup>6</sup> Interestingly, the impact of preadmission use of benzodiazepine in stroke had never been evaluated as stroke is emerging as a leading cause of preventable death and disability worldwide. Benzodiazepines, because of their good efficacy and rapidity of action, are also one of the most prescribed drugs in the world, widely used for anxiety and insomnia. The objective of our study was so to investigate the effect of preadmission use of benzodiazepine usage on stroke outcome, to clarify their role as stroke prognostic factors

1  
2  
3  
4  
5  
6  
7  
8  
9  
10  
11  
12  
13  
14  
15  
16  
17  
18  
19  
20  
21  
22  
23  
24  
25  
26  
27  
28  
29  
30  
31  
32  
33  
34  
35  
36  
37  
38  
39  
40  
41  
42  
43  
44  
45  
46  
47  
48  
49  
50  
51  
52  
53  
54  
55  
56  
57  
58  
59  
60

For peer review only

## METHODS.

### Patient and public involvement statement.

Patients with ischemic stroke admitted to our university hospital's stroke unit (*Lille, France*) within 48 hours of symptom onset were recruited in the prospective “Biostroke” cohort (Clinical Biological and Pharmacological Factors Influencing Stroke Outcome). The aim of the study was to understand the mechanisms of preventive neuroprotection by establishing link between biomarkers and preventive and neuroprotective measures (clinicaltrials.gov: number NCT00763217).<sup>6</sup> Use of benzodiazepine was one of the interests. The local independent ethical committee approved the study (*Comité de Protection des Personnes Nord-Ouest IV*). Patients were managed according to local rules without any investigation or treatment specifically performed. Patients or close relatives gave a signed informed consent.

### Data collection and clinical outcomes definition.

All patients underwent an initial standardized evaluation, including their medical history) and vascular risk factors (using a structured questionnaire), a physical examination, a routine blood biochemistry screen, and diagnostic testing. At admission patients underwent either CT or MRI scan.

Patients had a follow-up examination 8 and 90 days after admission. The modified Rankin scale (mRS), the Barthel index (BI), the Mini Mental State Examination (MMSE), and all-cause mortality were recorded. Definitions used for variables included in the analysis have been previously defined.<sup>2</sup> A National Institutes of Health Stroke Scale (NIHSS) score  $\geq 6$  was considered as a severe clinical impairment. A mRS score  $\geq 2$  (poor functional outcome), a BI score  $< 95$  (poor functional outcome), and a MMSE score  $< 24$  (cognitive impairment) were

1  
2  
3 considered as the worst possible stroke outcomes.<sup>2</sup> We also analysed the association between  
4 benzodiazepine use and respiratory failure and pneumonia at the acute phase of stroke.  
5  
6  
7  
8  
9

#### 10 Preadmission use of GABA receptors agonists.

11  
12 Drug exposition was defined by benzodiazepine drugs administered orally for more than  
13 fifteen days before stroke regardless of length of treatment period and dosage of treatment.  
14 Hypnotic drugs were also included, since they act on similar receptors to the benzodiazepines.  
15 Patients with concomitant use of other psychoactive drugs were excluded, because of their  
16 possible confounding effects.  
17  
18  
19  
20  
21  
22  
23  
24  
25

#### 26 Statistical analysis.

27  
28 Quantitative variables are expressed as mean (standard deviation) in case of normal  
29 distribution or median (interquartile range) otherwise. Categorical variables are expressed as  
30 numbers (percentage). Normality of distributions were assessed using histograms and Shapiro-  
31 Wilk test. Bivariate comparisons between benzodiazepine users and non-users were performed  
32 using Student's t test for quantitative variables (Mann-Whitney U test was used for non-Gaussian  
33 distribution) and Chi-squared test (Fisher's exact test was used when the expected cell frequency  
34 was <5) for categorical variables  
35  
36  
37  
38  
39  
40  
41  
42  
43

44 We assessed the effect of the benzodiazepine use on clinical outcomes at 8 and 90 days  
45 (all-cause mortality, NIHSS  $\geq 6$ , mRS  $\geq 2$ , BI  $< 95$  and MMSE  $< 24$ ) using logistic regression  
46 models and calculated the odds ratio (OR) associated with benzodiazepine use as the treatment  
47 effect size. In order to reduce the effects of potential confounding factors in the between-group  
48 comparisons, we used propensity-score methods.<sup>7</sup> As the main analysis, propensity score was  
49 used to assemble well-balanced groups (propensity score-matched cohort) and generalized  
50  
51  
52  
53  
54  
55  
56  
57  
58  
59  
60



1  
2  
3 estimating equations (GEE) models were used to take into account the matched design. As a  
4  
5 secondary analysis, the propensity score was used as a covariate in logistic regression models to  
6  
7 adjust the comparisons (propensity score-adjusted cohort).  
8  
9

10 The propensity score was estimated using a non-parsimonious multivariate logistic  
11  
12 regression model, with the benzodiazepine treatment group as the dependent variable and all of  
13  
14 the characteristics listed in Table 1 as covariates. Benzodiazepine users were matched 1:1 to  
15  
16 patients in the non-benzodiazepine users according to propensity score using the greedy nearest  
17  
18 neighbor matching algorithm with a caliper width of 0.2 standard deviation of logit for propensity  
19  
20 score.<sup>8,9</sup> To evaluate bias reduction using the propensity score matching method, absolute  
21  
22 standardized differences were calculated before and after propensity-score matching; an absolute  
23  
24 standardized difference > 10% indicated a meaningful imbalance in the baseline covariate.<sup>10</sup>  
25  
26

27 Because of missing baseline data (see supplemental table 1), the propensity score could not be  
28  
29 computed in 54.5% (n=183) of the study sample (61.3% in benzodiazepine users and 52.9% in  
30  
31 non-benzodiazepine users). We therefore estimated the treatment effect size in propensity score-  
32  
33 matched- and -adjusted cohorts after handling missing covariate values by multiple imputation<sup>11</sup>  
34  
35 using a regression switching approach (chained equations with m=20 imputations obtained using  
36  
37 the R statistical software version 3.03).<sup>12</sup> Imputation procedure was performed under the missing  
38  
39 at random assumption using all variables listed in Table 1 (i.e. baseline characteristics and  
40  
41 treatment group) with a predictive mean matching method for continuous variables and logistic  
42  
43 regression model for categorical (all binary) variables. In each imputed dataset, we calculated the  
44  
45 propensity score and assembled a matched cohort to provide both adjusted and matched ORs. We  
46  
47 therefore combined the ORs from each imputed dataset using Rubin's rules.<sup>13</sup>  
48  
49  
50  
51  
52  
53  
54  
55  
56  
57  
58  
59  
60

1  
2  
3 Since, among alive patients, the rate of missing data was high for 8- and 90-day MMSE  
4 (27% and 24%, respectively), we also used multiple imputation approach to handle these missing  
5 values as a sensitivity analysis. Statistical testing was done at the two-tailed  $\alpha$  level of 0.05. Data  
6 were analyzed using SAS software (version 9.3, SAS Institute Inc., Cary, NC, USA).  
7  
8  
9  
10  
11  
12  
13  
14  
15  
16  
17  
18  
19  
20  
21  
22  
23  
24  
25  
26  
27  
28  
29  
30  
31  
32  
33  
34  
35  
36  
37  
38  
39  
40  
41  
42  
43  
44  
45  
46  
47  
48  
49  
50  
51  
52  
53  
54  
55  
56  
57  
58  
59  
60

## RESULTS

Among the 370 patients included in the Biostroke study, 34 patients (mean age, 69.0±13.7; 14 men) were excluded because of concomitant use of other psychoactive drugs. In the 336 remainders, 62 (18.5%) were under benzodiazepines when stroke occurred.

### **Benzodiazepine and baseline characteristics.**

The baseline characteristics of the study population according to benzodiazepine treatment are described in Table 1. Before matching, several meaningful differences (absolute standardized difference>10%) were found. In particular, benzodiazepine users were older (73.1±12.6 *versus* 65.4±15.0,  $p=0.0002$ ), more likely to be women (62.9 *versus* 42.7%,  $p=0.004$ ) and to have arterial hypertension (77.4% *versus* 56.6%,  $p=0.002$ ), lower BMI (25.6±4.8 *versus* 27.0±4.9,  $p=0.042$ ) and lower levels of alanine aminotransferase (18 (14-23) *versus* 21 (15-29),  $p=0.029$ ) than benzodiazepine users. These differences were reduced after propensity score-matching (Figure 1 & supplemental table 2) with an absolute standardized difference >10% only for onset to admission time (22.0%), and prothrombin index (14.8%) suggesting that the two study groups were well balanced after matching.

### **Benzodiazepine and Outcomes**

Of the 336 study patients, 20 patients were lost to follow-up between day 8 and day 90 (see supplemental table 3 for their main characteristics). Death occurred in 11 patients (3.3%) at day-8 and 36 (11.4%) at day-90 (see supplemental table 4 for main individual characteristics of mortality cases). 57.9% of survivor patients taking benzodiazepines at admission continued to take them after stroke at day-8, 46.5 % at day-90.

1  
2  
3 In unadjusted analysis, the mortality rate was higher in benzodiazepines users than non-  
4 users at day-8 (2.2% vs. 8.1%,  $p=0.034$ ) and day-90 (8.1% vs. 25.9%,  $p=0.0001$ ). However, after  
5  
6  
7  
8  
9  
10  
11  
12  
13  
14  
15  
16  
17  
18  
19  
20  
21  
22  
23  
24  
25  
26  
27  
28  
29  
30  
31  
32  
33  
34  
35  
36  
37  
38  
39  
40  
41  
42  
43  
44  
45  
46  
47  
48  
49  
50  
51  
52  
53  
54  
55  
56  
57  
58  
59  
60

In unadjusted analysis, the mortality rate was higher in benzodiazepines users than non-users at day-8 (2.2% vs. 8.1%,  $p=0.034$ ) and day-90 (8.1% vs. 25.9%,  $p=0.0001$ ). However, after controlling for baseline differences using propensity-score matching, only the difference in mortality rate at 90-day was of borderline of significance, with a matched OR of 3.93 (95%CI, 0.91-16.98; table 2). In adjusted-propensity-score cohort, this difference remained significant with a similar treatment effect size (adjusted OR, 3.50; 95%CI, 1.57 to 7.76; table 3).

In unadjusted analysis, a higher rate of poor functional outcome at day-8 defined by  $mRS \geq 2$  or by the  $BI < 95$  was found in benzodiazepines users (table 3). A similar between-group difference was found for  $mRS \geq 2$  at 90-day. However, none of the differences were found in propensity-score matched (table 2). In propensity-score adjusted cohort, only the difference in  $mRS \geq 2$  at 90-day remained significant (adjusted OR, 1.89; 95%CI, 1.02 to 3.48).

In survivors at day-8 or at day-90, there was no significant difference in MMSE, in unadjusted, propensity-score matched and adjusted analyses. When the analyses were repeated after handling the missing data on MMSE by using multiple imputation approach (see supplemental table 5 for main baseline characteristics in patients with and without missing values), similar non-significant differences were found. In propensity-score matched cohort, the OR (95%CI) were 0.82 (0.30 to 2.19) for 8-day  $MMSE < 24$  and 1.04 (0.23 to 4.51) for 90-day  $MMSE < 24$ . In propensity-score adjusted cohort, the OR (95%CI) were 0.89 (0.43 to 1.83) for 8-day  $MMSE < 24$  and 1.04 (0.34 to 3.16) for 90-day  $MMSE < 24$ .

Regarding respiratory failure or pneumonia at 8 day, benzodiazepines users have a similar early respiratory complications risk than non-users (13.8% ( $n=8$ ) vs. 15.6% ( $n=48$ ), unadjusted  $p=0.73$ ).

## DISCUSSION

Preadmission use of benzodiazepines could not be considered as neuroprotective, as users of benzodiazepines could have a higher risk of death at 90-days after stroke.

### **Mortality and benzodiazepines.**

A recent review does not provide the evidence to support the use of GABA receptor agonists for the treatment of patients with acute ischaemic stroke.<sup>5</sup> Randomized controlled trials (RCTs) investigating GABA receptor agonists versus placebo for acute stroke patients with the outcomes of death or dependency and functional independence were included. These RCTs measured death and dependency at three months in clomethiazole versus placebo or between diazepam and placebo without significant difference. In a recent non-randomized comparison, treatment with benzodiazepines after ischaemic stroke had no independent impact on stroke outcomes and mortality at 90-day.<sup>14</sup> However, these data were registered in a trials archive and were not derived from prospective trials, with indication bias and many confounders. In our prospective study, current users of benzodiazepines could have a higher rate of post-stroke mortality at 90-day. Effect of benzodiazepine drugs on mortality is still debated, but these results are consistent with those from the literature. In a large cohort of patients attending primary care, GABA<sub>A</sub> receptors agonists were associated with significantly increased risk of mortality.<sup>15</sup> In two other representative databases, a significant while moderate increase in all-cause mortality in relation to benzodiazepines was found, in a population of incident and mostly occasional users.<sup>16</sup> A recent population-wide register-based study identified that benzodiazepines are more frequently used in patients with strokes than in controls and are associated with greater all-cause mortality in patients with stroke and matched controls.<sup>17</sup> The use of anti-anxiety medication and

1  
2  
3 mortality risk in patients following myocardial has also been studied in a sampling database.<sup>18</sup>  
4  
5 Sudden death was significantly associated with increased benzodiazepam dosage during  
6  
7 approximately five years. For patients receiving higher doses of daily benzodiazepines, protective  
8  
9 effects for cardiac mortality and heart failure hospitalization decreased and a J-curve dose-  
10  
11 response relationship was seen, without providing an adequate mechanistic explanation.  
12  
13 Benzodiazepines have been shown to increase the occurrence of community-acquired  
14  
15 pneumonia,<sup>19</sup> due to their pharmacodynamic properties. In our cohort, prior use of  
16  
17 benzodiazepines didn't increase the incidence of respiratory depression and cannot explain  
18  
19 mortality in these patients.  
20  
21  
22  
23  
24  
25

### 26 **Cognition and benzodiazepines.**

27  
28 Benzodiazepine use was neither associated with cognitive impairment at 8 days or 90  
29  
30 days. However, the short-term effects of benzodiazepines on impairment cognition are well  
31  
32 known and use of benzodiazepines is also associated with increased risk of dementia, even if the  
33  
34 nature of the link between benzodiazepines and Alzheimer's disease remains unclear.<sup>20</sup> In our  
35  
36 cohort, GABA receptor agonists treatment before stroke didn't show cognitive impairment as  
37  
38 assessed by MMSE, in these elderly patients without dementia, but a longer follow-up period  
39  
40 may be useful. Further, although we use methods to impute for missing data, data are missing on  
41  
42 follow-up - loss to follow-up in a set, and then lack of doing MMSE on follow-up in another set  
43  
44 (post-stroke aphasia) - which are likely not missing at random.  
45  
46  
47  
48  
49  
50

### 51 **Comorbid alcohol use disorder.**

52  
53 Prior benzodiazepine use (regardless the dosage of treatment) was not associated with  
54  
55 higher baseline stroke severity, as excessive chronic ethanol consumption was.<sup>6</sup> Benzodiazepine  
56  
57  
58  
59  
60

1  
2  
3 users were also less likely to be alcohol drinkers in our study, although the difference did not  
4 reach the significance level. So, the relationship between stroke severity and alcohol consumption  
5 could not be necessarily due to a link between GABA receptors and alcohol, but due to chronic  
6 effects of ethanol consumption on other organ systems.  
7  
8  
9  
10

### 11 12 13 14 **Strengths and limitations.**

15  
16 Our stroke data base was prospectively collected, and the study was carried out in a  
17 representative cohort of routine clinical stroke patients with an exhaustive drug history analysis.  
18 Dosage and compliance rate were not controlled for. More data on the length of time patients had  
19 been using the drug were not available but it is reasonable to think that they had an inadequate  
20 situation with excessive duration of prescription (demographic characteristics).<sup>21</sup> Further research  
21 should definitely explore correlations between dosage or cumulative length of exposure and post-  
22 stroke mortality. Also, potentially multi-site studies need acknowledgement, as does the need for  
23 replication in countries where there may be different practice in the prescribing on  
24 benzodiazepines. In our study, there was no clear association between mortality and poor  
25 functional outcome. For the deaths, information about the underlying cause was not obtained, but  
26 was not associated with stroke severity. It is important to acknowledge that this study is also  
27 limited to stroke outcomes in patients admitted to hospital after stroke. Unfortunately, we don't  
28 have information on premorbid functional status.  
29  
30  
31  
32  
33  
34  
35  
36  
37  
38  
39  
40  
41  
42  
43  
44  
45

46 The present findings are derived from observational analyses which are subject to well-known  
47 limitations. The first is the potential for confounding by measured or unmeasured variables,  
48 which cannot be ruled out, even after propensity score matching/adjustment. It's also possible that  
49 the indication for benzodiazepines may be a causative variable, as mood (depression or anxiety)  
50 increases mortality in stroke.<sup>22</sup> Our results should be interpreted as hypothesis generating  
51  
52  
53  
54  
55  
56  
57  
58  
59  
60

1  
2  
3 (without possibility of concluding that there is a causal effect).  
4

5 Another limitation was the presence of missing data in some covariates, including in the  
6 propensity score calculation, as well as in MMSE outcome. Although we used multiple  
7 imputations to handle missing data as appropriate, we could not exclude that missing data could  
8 introduce a bias in estimates. Since no formal study sample size was calculated, we could not  
9 exclude that some differences may have been overlooked due to the lack of adequate statistical  
10 power. In a posterior power calculation, we calculated the smallest significant between-group  
11 difference (expressed as effect size using odd ratio) that our study sample size allowed us to  
12 detect with a 80% power. Assuming an incidence of outcome of 10% and 50% in non-  
13 benzodiazepines users, we could detect an OR of 4.0 and 3.1 in the propensity score-matched  
14 cohort and 2.8 and 2.3 in propensity score-adjusted cohort.  
15  
16  
17  
18  
19  
20  
21  
22  
23  
24  
25  
26  
27  
28  
29  
30

### 31 **Unanswered questions and implication for clinical practice.**

32  
33 The lack of consistency of results for moderate increase mortality and functional  
34 outcomes make this less likely to explain a physiologic effect. Anyway, the possible increased  
35 rate of mortality after stroke found in the benzodiazepines users group add to the increasing body  
36 of evidence concerning a non-neuroprotective effect of GABA receptors agonists.  
37 Benzodiazepines reduce the cerebral metabolic rate of oxygen and cerebral blood flow and can  
38 induce post-hypoxic leukoencephalopathy.<sup>23,24</sup> As lack of blood flow leads to cerebral hypoxia, it  
39 results in a cascade of biological events, which facilitates glutamate release. Based upon these  
40 data, we hypothesized that chronic cerebral hypoxia could thus be induced by benzodiazepine  
41 use, especially with inadequate situation with excessive duration of treatment. Long-term  
42 modulation of GABA<sub>A</sub> receptors by benzodiazepines could modulate ischaemia-induced  
43 glutamate release. Our findings generate a hypothesis that needs confirmation. As an  
44  
45  
46  
47  
48  
49  
50  
51  
52  
53  
54  
55  
56  
57  
58  
59  
60



1  
2  
3 interventional study would not be feasible, this question can be answered through experimental  
4  
5 approaches in animals, to provide an appropriate mechanistic explanation.  
6  
7  
8  
9

10 This research should also not be used to condemn GABA receptor agonist drugs since their  
11 short-term use can have an important role in the management of anxiety. This study should  
12 however alert clinicians to a possible increased post-stroke mortality in benzodiazepine-users. As  
13 patients could also be at high risk of recurrence after stroke, use of benzodiazepines should be  
14 cautioned against.  
15  
16  
17  
18  
19  
20  
21  
22  
23  
24  
25  
26  
27  
28  
29  
30  
31  
32  
33  
34  
35  
36  
37  
38  
39  
40  
41  
42  
43  
44  
45  
46  
47  
48  
49  
50  
51  
52  
53  
54  
55  
56  
57  
58  
59  
60

1  
2  
3  
4  
5 **CONCLUSION.**  
6  
7  
8  
9

10 Our findings do not support a putative neuroprotective effect of benzodiazepines. Further larger  
11 studies are warranted to confirm the association between benzodiazepine use and early post-  
12 stroke mortality.  
13  
14  
15  
16  
17  
18  
19  
20  
21  
22  
23  
24  
25  
26  
27  
28  
29  
30  
31  
32  
33  
34  
35  
36  
37  
38  
39  
40  
41  
42  
43  
44  
45  
46  
47  
48  
49  
50  
51  
52  
53  
54  
55  
56  
57  
58  
59  
60

**Table 1. Comparison of baseline characteristics between benzodiazepine users and non-users.**

|                                    | Benzodiazepine<br>non-users<br>(n=274) | Benzodiazepine<br>users<br>(n=62) | <i>P</i> (ASD, %) |
|------------------------------------|----------------------------------------|-----------------------------------|-------------------|
| <b>Demographic characteristics</b> |                                        |                                   |                   |
| Age, y, mean±SD                    | 65.4 ± 15.0                            | 73.1 ± 12.6                       | 0.0002 (55.7)     |
| Men                                | 157 (57.3)                             | 23 (37.1)                         | 0.004 (41.3)      |
| <b>Medical history</b>             |                                        |                                   |                   |
| Previous stroke                    | 28 (10.3)                              | 7 (11.3)                          | 0.81 (3.3)        |
| Previous TIA                       | 20 (7.3)                               | 5 (8.1)                           | 0.79 (2.9)        |
| Coronary artery disease            | 52 (19.0)                              | 17 (27.4)                         | 0.14 (20.1)       |
| Sleep apnea syndrome               | 7 (2.6)                                | 2 (3.2)                           | 0.68 (3.8)        |
| Heart rhythm disorders             | 59 (21.6)                              | 20 (32.3)                         | 0.075 (24.2)      |
| <b>Vascular risk factors</b>       |                                        |                                   |                   |
| Arterial hypertension              | 155 (56.6)                             | 48 (77.4)                         | 0.002 (45.5)      |
| Diabetes mellitus                  | 59 (21.5)                              | 7 (11.3)                          | 0.067 (27.9)      |
| Hypercholesterolemia               | 124 (45.3)                             | 34 (54.8)                         | 0.17 (19.3)       |
| Hypertriglyceridemia               | 41 (15.0)                              | 11 (17.7)                         | 0.58 (7.5)        |
| Smoking                            | 89 (32.5)                              | 13 (21.0)                         | 0.075 (26.2)      |
| Chronic ethanol consumption        | 45 (16.5)                              | 7 (11.5)                          | 0.33 (14.5)       |
| BMI, kg/m <sup>2</sup> , mean±SD   | 27.0 ± 4.9                             | 25.6 ± 4.8                        | 0.042 (29.6)      |
| <b>Routine drugs</b>               |                                        |                                   |                   |
| Fibrates                           | 17 (6.2)                               | 6 (9.7)                           | 0.40 (12.9)       |
| Statins                            | 85 (31.0)                              | 22 (35.5)                         | 0.50 (9.5)        |
| Oral anticoagulants                | 17 (6.2)                               | 2 (3.2)                           | 0.54 (14.1)       |
| Antiplatelet                       | 98 (35.8)                              | 28 (45.2)                         | 0.17 (19.2)       |

|                                                        |                  |                   |              |
|--------------------------------------------------------|------------------|-------------------|--------------|
| ACE                                                    | 47 (17.1)        | 16 (25.8)         | 0.12 (21.2)  |
| Angiotensin II receptor antagonist                     | 46 (16.8)        | 10 (16.1)         | 0.90 (1.8)   |
| Diuretics                                              | 65 (23.7)        | 21 (33.9)         | 0.098 (22.6) |
| Calcium channel blockers                               | 42 (15.3)        | 11 (17.7)         | 0.64 (6.5)   |
| Betablockers                                           | 98 (35.9)        | 29 (46.8)         | 0.11 (22.2)  |
| Oral hypoglycemic                                      | 45 (16.4)        | 6 (9.7)           | 0.18 (20.1)  |
| Intravenous thrombolysis                               | 78 (28.9)        | 16 (25.8)         | 0.63 (6.9)   |
| Onset to admission time, hours, median (IQR)           | 2 (1 to 7)       | 2 (1 to 4)        | 0.36 (12.8)  |
| NIHSS, median (IQR)                                    | 6 (2-13)         | 7 (2-18)          | 0.42(12.8)   |
| <b>Biological characteristics</b>                      |                  |                   |              |
| Triglycerides, g/L, median (IQR)                       | 1.06 (0.81-1.56) | 1.01 (0.84-1.56)  | 0.93 (1.3)   |
| Total cholesterol, g/L, mean±SD                        | 1.96 ± 0.49      | 1.92 ± 0.52       | 0.60 (7.4)   |
| HDL-cholesterol, g/L, mean±SD                          | 0.53 ± 0.17      | 0.54 ± 0.13       | 0.86 (2.4)   |
| LDL-cholesterol, g/L, mean±SD                          | 1.17 ± 0.41      | 1.14 ± 0.44       | 0.61 (7.2)   |
| Glycated hemoglobin, %, median (IQR)                   | 5.9 (5.6-6.5)    | 5.9 (5.7-6.3)     | 0.98 (0.4)   |
| Hemoglobin, g/dL, median (IQR)                         | 13.8 (12.9-14.9) | 13.5 (12.5-14.2)  | 0.077 (25.5) |
| Leukocytes, /mm <sup>3</sup> , median (IQR)            | 8320 (6745-9865) | 8335 (6700-10680) | 0.55 (8.0)   |
| Neutrophils, /mm <sup>3</sup> , median (IQR)           | 5400 (4200-7400) | 5850 (4500-8150)  | 0.26 (16.0)  |
| Platelets, 1000/mm <sup>3</sup> , median (IQR)         | 235 (197-271)    | 234.5 (192-274)   | 0.88 (2.1)   |
| Prothrombin index, %, median (IQR)                     | 96 (88-100)      | 94 (86-100)       | 0.42 (11.3)  |
| Activated partial thromboplastin time, s, median (IQR) | 32 (29-35)       | 32 (28-37)        | 0.52 (8.6)   |
| C-reactive protein, mg/L, median (IQR)                 | 4.7 (2.0-9.7)    | 5.5 (2.5-9.7)     | 0.65 (7.1)   |
| Aspartate aminotransferase, U/L, median (IQR)          | 23 (19-29)       | 23 (20-27)        | 0.88 (2.2)   |
| Alanine aminotransferase, U/L, median (IQR)            | 21 (15-29)       | 18 (14-23)        | 0.029 (32.2) |

Data are expressed as number (%) unless otherwise indicated.

1  
2  
3  
4  
5  
6  
7  
8  
9  
10  
11  
12  
13  
14  
15  
16  
17  
18  
19  
20  
21  
22  
23  
24  
25  
26  
27  
28  
29  
30  
31  
32  
33  
34  
35  
36  
37  
38  
39  
40  
41  
42  
43  
44  
45  
46  
47  
48  
49  
50  
51  
52  
53  
54  
55  
56  
57  
58  
59  
60

Abbreviations: ACE=angiotensin converting enzyme, ASD=absolute standardized difference, BMI= body mass index, HDL= high density lipoprotein, IQR=interquartile range, LDL=low density lipoprotein, NIHSS= National Institutes of Health Stroke Scale, SD=standard deviation, TIA=transient ischemic attack.

For peer review only

**Table 2. Outcomes at 8-day and 90-day after stroke according to prior benzodiazepine use  
In Propensity-Score-Matched Cohort.**

|                                 | Benzodiazepine users |              | Propensity-score –Matched† |          |
|---------------------------------|----------------------|--------------|----------------------------|----------|
|                                 | No (n=56)            | Yes (n=56)*  | OR (95% CI)                | <i>p</i> |
| <b>Outcome at 8-day</b>         |                      |              |                            |          |
| All-cause death                 | 2/56 (4.3)           | 4/56 (6.8)   | 1.81 (0.23-13.90)          | 0.56     |
| NIHSS $\geq 6$                  | 19/51 (37.3)         | 20/51 (39.4) | 1.10 (0.46-2.60)           | 0.83     |
| Poor outcome (mRS $\geq 2$ )    | 33/54 (60.3)         | 34/54 (63.2) | 1.13 (0.48-2.66)           | 0.78     |
| Poor outcome (Barthel <95)      | 29/52 (55.3)         | 32/52 (61.2) | 1.28 (0.51-3.15)           | 0.59     |
| Cognitive impairment (MMSE <24) | 13/37 (34.4)         | 10/35 (28.0) | 0.75 (0.24-2.34)           | 0.62     |
| <b>Outcome at 90-day</b>        |                      |              |                            |          |
| All-cause death                 | 4/53 (7.6)           | 12/52 (23.5) | 3.93 (0.91-16.98)          | 0.067    |
| Poor outcome (mRS $\geq 2$ )    | 25/53 (46.4)         | 31/52 (59.7) | 1.72 (0.75-3.91)           | 0.19     |
| Poor outcome (Barthel <95)      | 18/49 (36.0)         | 16/40 (39.6) | 1.18 (0.47-2.94)           | 0.72     |
| Cognitive impairment (MMSE <24) | 6/37 (14.9)          | 5/33 (15.0)  | 1.04 (0.23-4.51)           | 0.96     |

Values are n/N (%) unless otherwise indicated, calculated after handling missing baseline data including in propensity-score calculation by multiple imputation procedure (m=20 imputed datasets; n were estimated using the combined rates and the mean number of patients without missing outcome values). \* mean numbers of matched pairs among the 20-imputed datasets. † calculated using a generalized estimating equations (GEE) model (binomial distribution, logit function) take into account the propensity-score matched design.

Abbreviations: *MMSE*: Mini Mental State Examination, mRS: modified Rankin score, NIHSS: National Institutes of Health Stroke Scale, OR: odds ratio, CI: confidence interval.

**Table 3. Outcomes at 8-day and 90-day after stroke according to prior benzodiazepine use  
In Propensity-score adjusted Cohorts.**

|                                 | Benzodiazepine users |              | <i>p</i> | Propensity-score –adjusted* |          |
|---------------------------------|----------------------|--------------|----------|-----------------------------|----------|
|                                 | No                   | Yes          |          | OR (95% CI)                 | <i>p</i> |
| <b>Outcome at 8-day</b>         | (n=274)              | (n=62)       |          |                             |          |
| All-cause death                 | 6/274 (2.2)          | 5/62 (8.1)   | 0.034    | 2.53 (0.68-9.27)            | 0.16     |
| NIHSS $\geq$ 6                  | 86/264 (32.58)       | 22/55 (40)   | 0.29     | 1.46 (0.77-2.75)            | 0.24     |
| Poor outcome (mRS $\geq$ 2)     | 137/270 (50.7)       | 39/60 (65.0) | 0.045    | 1.56(0.84-2.88)             | 0.15     |
| Poor outcome (Barthel <95)      | 119/265 (44.9)       | 35/56 (62.5) | 0.017    | 1.68 (0.90-3.14)            | 0.10     |
| Cognitive impairment (MMSE <24) | 52/196 (26.5)        | 11/40 (27.5) | 0.90     | 0.72 (0.31-1.62)            | 0.42     |
| <b>Outcome at 90-day</b>        | (n=258)              | (n=58)       |          |                             |          |
| All-cause death                 | 21/258 (8.1)         | 15/58 (25.9) | 0.0001   | 3.50 (1.57-7.76)            | 0.002    |
| Poor outcome (mRS $\geq$ 2)     | 110/258 (42.6)       | 35/58 (60.3) | 0.014    | 1.89 (1.02-3.48)            | 0.042    |
| Poor outcome (Barthel <95)      | 72/235 (30.6)        | 16/43 (37.2) | 0.39     | 1.31 (0.64-2.65)            | 0.45     |
| Cognitive impairment (MMSE <24) | 26/194 (13.4)        | 5/35 (14.3)  | 0.79     | 0.87 (0.29-2.55)            | 0.80     |

Values are n/N (%) unless otherwise indicated. \* logistic regression models adjusted on propensity score.

Abbreviations: *MMSE*: Mini Mental State Examination, mRS: modified Rankin score, NIHSS: National Institutes of Health Stroke Scale, OR: odds ratio, CI: confidence interval.

## **SOURCES OF FUNDING.**

This study was funded by the French Ministry of Health (as part of the PHRC programme).

## **AUTHORS' CONTRIBUTIONS**

OC wrote the manuscript and contributed to the analysis. JL performed statistical analysis and contributed to drafting the manuscript. JD contributed to drafting the manuscript. AMM contributed to study design and data collection. VD contributed to statistical analysis and contributed to drafting the manuscript. CC contributed to study design and data collection. DD contributed to study design, data collection and analysis. DL contributed to study design, data collection and analysis. RB contributed to study design, data collection and analysis, and drafting the manuscript. All authors have read and approved the final manuscript.

## **CONFLICTS OF INTEREST.**

The authors declare that they have no competing interests.

## **DATA SHARING STATEMENT**

No additional data are available.



## REFERENCES

1. Lozano R, Naghavi M, Foreman K, et al. Global and regional mortality from 235 causes of death for 20 age groups in 1990 and 2010: a systematic analysis for the Global Burden of Disease Study 2010. *Lancet*. 2012; 380:2095–2128.
2. Deplanque D, Masse I, Lefebvre C, Libersa C, Leys D, Bordet R. Prior TIA, lipid-lowering drug use, and physical activity decrease ischemic stroke severity. *Neurology*. 2006; 67:1403–1410.
3. Marshall JW, Green AR, Ridley RM. Comparison of the neuroprotective effect of clomethiazole, AR-R15896AR and NXY-059 in a primate model of stroke using histological and behavioural measures. *Brain Research*. 2003; 972:119-26.
4. Nelson RM, Green AR, Lambert DG, Hainsworth AH. On the regulation of ischemia-induced glutamate efflux from rat cortex by GABA: in vitro studies with GABA, clomethiazole and pentobarbitone. *British Journal of Pharmacology*. 2000; 130:1124-30.
5. Liu J, Wang LN. Gamma aminobutyric acid (GABA) receptor agonists for acute stroke. *Cochrane Database Syst Rev*. 2014;8:CD009622.
6. Ducroquet A, Leys D, Al Saabi A, Richard F, Cordonnier C, Giroit Marie et al. Influence of chronic ethanol consumption on the neurological severity in patients with acute cerebral ischemia. *Stroke*. 2013; 44:2324-6.
7. Austin PC. An Introduction to Propensity Score Methods for Reducing the Effects of Confounding in Observational Studies. *Multivar. Behav. Res*. 2011; 46:399–424.
8. Austin PC. A comparison of 12 algorithms for matching on the propensity score. *Stat. Med*. 2014; 33:1057–1069.

- 1  
2  
3 9. Austin PC. Optimal caliper widths for propensity-score matching when estimating  
4  
5 differences in means and differences in proportions in observational studies. *Pharm Stat.*  
6  
7 2011; 10(2): 150–161.  
8  
9
- 10 10. Austin PC. Balance diagnostics for comparing the distribution of baseline covariates  
11  
12 between treatment groups in propensity-score matched samples. *Stat. Med.* 2009;  
13  
14 28:3083–3107.  
15  
16
- 17 11. Mattei A. Estimating and using propensity score in presence of missing background data:  
18  
19 an application to assess the impact of childbearing on wellbeing. *Stat. Methods Appl.*  
20  
21 2008;18:257–273.  
22  
23
- 24 12. Buuren S, Groothuis-Oudshoorn K. mice: Multivariate imputation by chained equations in  
25  
26 R. *J. Stat. Softw.* [Internet]. 2011 [cited 2016 Feb 25];45. Available from:  
27  
28 <http://doc.utwente.nl/78938>.  
29  
30
- 31 13. Rubin DB. Multiple imputation for nonresponse in surveys. New York: Wiley; 1987.  
32
- 33 14. Frank B, Fulton RL, Lees KR, Sanders RD, VISTA Collaborators. Impact of  
34  
35 benzodiazepines on functional outcome and occurrence of pneumonia in stroke: evidence  
36  
37 from VISTA. *Int J Stroke.* 2014;9:890-4.  
38  
39
- 40 15. Weich S, Pearce HL, Croft P, Singh S, Crome I, Bashford J. Effect of anxiolytic and  
41  
42 hypnotic drug prescriptions on mortality hazards: retrospective cohort study. *BMJ.*  
43  
44 2014;348:g1996.  
45  
46
- 47 16. Palmaro A, Dupouy J, Lapeyre-Mestre ML. Benzodiazepines and risk of death: results  
48  
49 from two large cohort studies in France and UK. *Eur Neuropsychopharmacol.*  
50  
51 2015;25:1566-77.  
52  
53  
54  
55  
56  
57  
58  
59  
60

- 1  
2  
3 17. Jennum P, Baandrup L, Iversen HK, Ibsen R, Kjellberg J. Mortality and use of  
4  
5 psychotropic medication in patients with stroke: a population-wide, register-based study.  
6  
7 *BMJ Open*. 2016;6:e010662.  
8  
9
- 10 18. Wu CK, Huang YT, Lee JK, Jimmy Juang JM, Tsai CT, Lai LP et al. Anti-anxiety drugs  
11  
12 use and cardiovascular outcomes in patients with myocardial infarction: a national wide  
13  
14 assessment. *Atherosclerosis*. 2014;235:496-502.  
15  
16
- 17 19. Obiora E, Hubbard R, Sanders RD, Myles PR. The impact of benzodiazepines on  
18  
19 occurrence of pneumonia and mortality from pneumonia: a nested case-control and  
20  
21 survival analysis in a population-based cohort. *Thorax*. 2013; 68:163-70.  
22  
23
- 24 20. Billioti de Gage S, Bégaud B, Bazin F, Verdoux H, Dartigues JF, Pérès K et al.  
25  
26 Benzodiazepine use and risk of dementia: prospective population-based study. *BMJ*.  
27  
28 2012;345:e6231.  
29  
30
- 31 21. Airagnes G, Pelissolo A, Lavallée M et al. Benzodiazepine Misuse in the Elderly: Risk  
32  
33 Factors, Consequences, and Management. *Curr Psychiatry Rep*. 2016 Oct;18(10):89.  
34  
35
- 36 22. House A, Knapp P, Bamford J, Vail A. Mortality at 12 and 24 months after stroke may be  
37  
38 associated with depressive symptoms at 1 month. *Stroke*. 2001 Mar;32(3):696-701.  
39  
40
- 41 23. Forster A, Juge O, Morel D. Effects of midazolam on cerebral blood flow in human  
42  
43 volunteers. *Anesthesiology*. 1982;56:453-5.  
44  
45
- 46 24. Bartlett E, Mikulis DJ. Chasing "chasing the dragon" with MRI: leukoencephalopathy in  
47  
48 drug abuse. *British J Radiol*. 2005;78:997-1004.  
49  
50  
51  
52  
53  
54  
55  
56  
57  
58  
59  
60

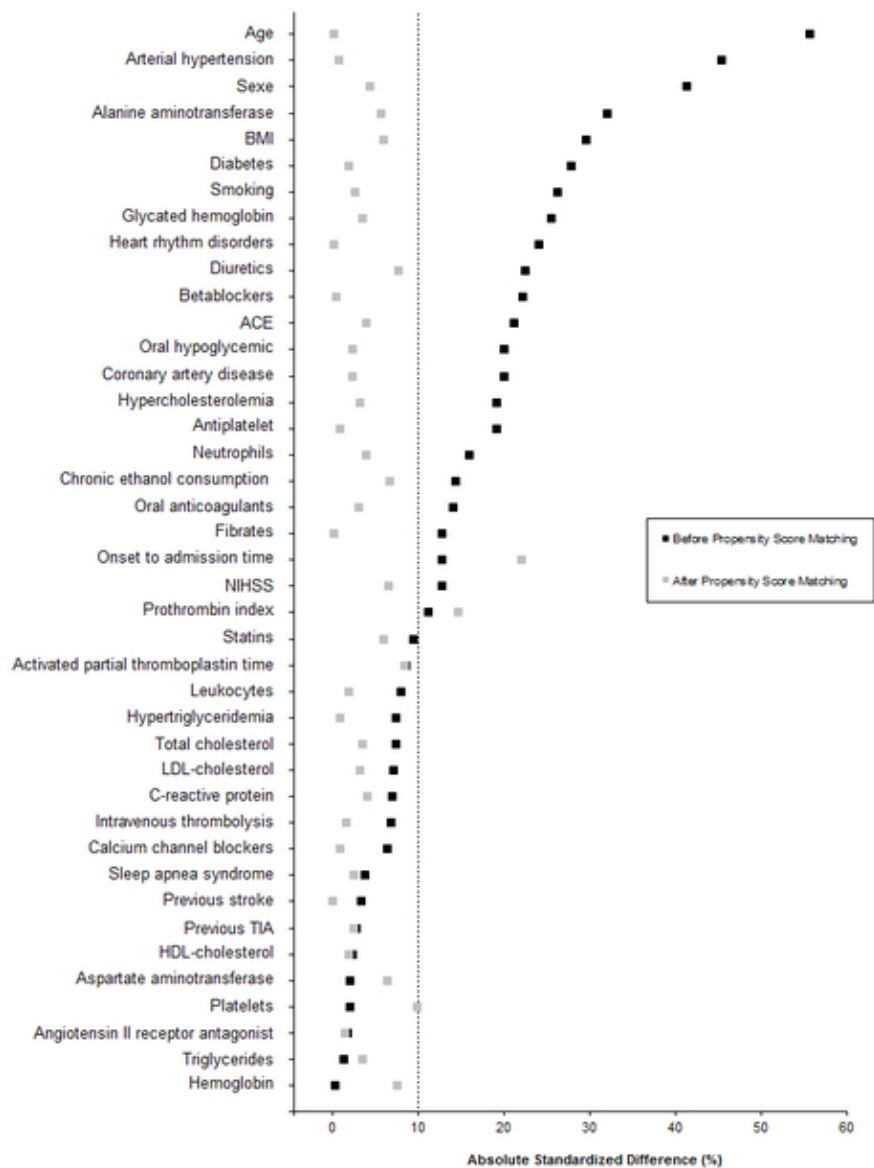

Figure 1. Absolute standardized differences between benzodiazepine users and non-users before and after propensity score matching.

40x53mm (300 x 300 DPI)

**ONLINE SUPPLEMENT.****Supplemental table 1. Main baseline characteristics and Outcomes of Overall Study population (N=336)**

|                                    | N   | Value       |
|------------------------------------|-----|-------------|
| <b>Demographic characteristics</b> |     |             |
| Age, y, mean±SD                    | 336 | 66.9 ± 14.9 |
| Men                                | 336 | 180 (53.6)  |
| <b>Medical history</b>             |     |             |
| Previous stroke                    | 335 | 35 (10.5)   |
| Previous TIA                       | 336 | 25 (7.4)    |
| Coronary artery disease            | 336 | 69 (20.5)   |
| Sleep apnea syndrome               | 333 | 9 (2.7)     |
| Heart rhythm disorders             | 335 | 79 (23.6)   |
| <b>Vascular risk factors</b>       |     |             |
| Arterial hypertension              | 336 | 203 (60.4)  |
| Diabetes mellitus                  | 336 | 66 (19.6)   |
| Hypercholesterolemia               | 336 | 158 (47.0)  |
| Hypertriglyceridemia               | 336 | 52 (15.5)   |
| Smoking                            | 336 | 102 (30.4)  |
| Chronic ethanol consumption        | 334 | 52 (15.6)   |
| BMI, kg/m <sup>2</sup> , mean±SD   | 312 | 26.8 ± 4.9  |
| <b>Routine drugs</b>               |     |             |
| Fibrates                           | 336 | 23 (6.9)    |
| Statins                            | 336 | 107 (31.9)  |
| Oral anticoagulants                | 336 | 19 (5.7)    |
| Antiplatelet                       | 336 | 126 (37.5)  |
| ACE                                | 336 | 63 (18.8)   |
| Angiotensin II receptor antagonist | 336 | 56 (16.7)   |
| Diuretics                          | 336 | 86 (25.6)   |

|                                                        |     |                   |
|--------------------------------------------------------|-----|-------------------|
| Calcium channel blockers                               | 336 | 53 (15.8)         |
| Betablockers                                           | 335 | 127 (37.9)        |
| Oral hypoglycemic                                      | 336 | 51 (15.2)         |
| Intravenous thrombolysis                               | 332 | 94 (28.3)         |
| Onset to admission time, hours, median (IQR)           | 332 | 2 (1-7)           |
| NIHSS, median (IQR)                                    | 336 | 6 (2-14)          |
| <b>Biological characteristics</b>                      |     |                   |
| Triglycerides, g/L, median (IQR)                       | 329 | 1.1 (0.8-1.6)     |
| Total cholesterol, g/L, mean±SD                        | 329 | 1.95 ± 0.50       |
| HDL-cholesterol, g/L, mean±SD                          | 321 | 0.53 ± 0.16       |
| LDL-cholesterol, g/L, mean±SD                          | 319 | 1.16 ± 0.41       |
| Glycated hemoglobin, %, median (IQR)                   | 245 | 5.9 (5.6-6.4)     |
| Hemoglobin, g/dL, median (IQR)                         | 335 | 13.7 (12.9-14.7)  |
| Leukocytes, /mm <sup>3</sup> , median (IQR)            | 334 | 8320 (6730-10130) |
| Neutrophils, /mm <sup>3</sup> , median (IQR)           | 315 | 5.6 (4.2-7.5)     |
| Platelets, 1000/mm <sup>3</sup> , median (IQR)         | 335 | 235 (195-272)     |
| Prothrombin index, %, median (IQR)                     | 320 | 95 (86-100)       |
| Activated partial thromboplastin time, s, median (IQR) | 333 | 32 (29-35)        |
| C-reactive protein, mg/L, median (IQR)                 | 280 | 4.9 (2-9.7)       |
| Aspartate aminotransferase, U/L, median (IQR)          | 321 | 23 (19-28)        |
| Alanine aminotransferase, U/L, median (IQR)            | 322 | 20 (15-28)        |
| <b>Outcome at 8-day</b>                                |     |                   |
| All-cause death                                        | 336 | 11 (3.3)          |
| NIHSS ≥6                                               | 319 | 108 (33.9)        |
| Poor outcome (mRS ≥2)                                  | 330 | 176 (53.3)        |
| Poor outcome (Barthel <95)                             | 321 | 154 (48.0)        |
| Cognitive impairment (MMSE <24)                        | 236 | 63 (26.7)         |
| <b>Outcome at 90-day</b>                               |     |                   |
| All-cause death                                        | 316 | 36 (11.4)         |
| Poor outcome (mRS ≥2)                                  | 316 | 145 (45.9)        |

|                                 |     |           |
|---------------------------------|-----|-----------|
| Poor outcome (Barthel <95)      | 278 | 88 (31.7) |
| Cognitive impairment (MMSE <24) | 229 | 31 (13.5) |

Abbreviations: ACE=angiotensin converting enzyme, ASD=absolute standardized difference, BMI= body mass index, HDL= high density lipoprotein, IQR=interquartile range, LDL=low density lipoprotein, MMSE: Mini Mental State Examination, mRS: modified Rankin score, NIHSS= National Institutes of Health Stroke Scale, SD=standard deviation, TIA=transient ischemic attack

For peer review only

**Supplemental Table 2. Baseline characteristics in benzodiazepine users and non-users after propensity-score matching.**

|                                    | Benzodiazepine<br>non-users (n=56) * | Benzodiazepine<br>users (n=56) * | ASD, % |
|------------------------------------|--------------------------------------|----------------------------------|--------|
| <b>Demographic characteristics</b> |                                      |                                  |        |
| Age, y, mean±SD                    | 72.6 ± 14.9                          | 72.6 ± 12.6                      | 0.2    |
| Men                                | 24 (42.6)                            | 23 (40.4)                        | 4.5    |
| <b>Medical history</b>             |                                      |                                  |        |
| Previous stroke                    | 6 (9.9)                              | 5 (9.7)                          | 0.1    |
| Previous TIA                       | 5 (8.1)                              | 4 (7.2)                          | 2.6    |
| Coronary artery disease            | 13 (23.7)                            | 14 (24.6)                        | 2.4    |
| Sleep apnea syndrome               | 2 (4.2)                              | 2 (3.6)                          | 2.5    |
| Heart rhythm disorders             | 16 (29.3)                            | 16 (29.3)                        | 0.2    |
| <b>Vascular risk factors</b>       |                                      |                                  |        |
| Arterial hypertension              | 43 (77.1)                            | 43 (76.8)                        | 0.8    |
| Diabetes mellitus                  | 7 (13.2)                             | 7 (12.3)                         | 5.7    |
| Hypercholesterolemia               | 30 (54.0)                            | 29 (52.3)                        | 3.3    |
| Hypertriglyceridemia               | 9 (16.5)                             | 9 (16.8)                         | 1.0    |
| Smoking                            | 13 (23.3)                            | 12 (21.9)                        | 2.7    |
| Chronic ethanol consumption        | 9 (15.6)                             | 7 (13.0)                         | 6.7    |
| BMI, kg/m <sup>2</sup> , mean±SD   | 26.2 ± 5.7                           | 25.9 ± 5.3                       | 6.0    |
| <b>Routine drugs</b>               |                                      |                                  |        |
| Fibrates                           | 6 (10.8)                             | 6 (10.7)                         | 0.2    |
| Statins                            | 19 (34.6)                            | 18 (31.7)                        | 6.0    |
| Oral anticoagulants                | 19 (34.6)                            | 18 (31.7)                        | 3.1    |
| Antiplatelet                       | 24 (43.1)                            | 24 (42.6)                        | 1.1    |
| ACE                                | 15 (26.3)                            | 14 (24.5)                        | 4.0    |
| Angiotensin II receptor antagonist | 9 (16.9)                             | 10 (17.4)                        | 1.5    |
| Diuretics                          | 18 (31.9)                            | 20 (35.4)                        | 7.7    |



|                                                        |                  |                   |      |
|--------------------------------------------------------|------------------|-------------------|------|
| Calcium channel blockers                               | 10 (18.0)        | 10 (17.6)         | 1.0  |
| Betablockers                                           | 26 (46.0)        | 26 (45.8)         | 0.5  |
| Oral hypoglycemic                                      | 6 (11.5)         | 6 (10.6)          | 2.4  |
| Intravenous thrombolysis                               | 16 (27.8)        | 15 (27.0)         | 1.6  |
| Onset to admission time, hours, median (IQR)           | 2 (1-8)          | 2 (1-3)           | 22.0 |
| NIHSS, median (IQR)                                    | 8 (2-17)         | 6 (2-18)          | 6.7  |
| <b>Biological characteristics</b>                      |                  |                   |      |
| Triglycerides, g/L, median (IQR)                       | 1.02 (0.81-1.54) | 1.02 (0.82-1.58)  | 3.6  |
| Total cholesterol, g/L, mean±SD                        | 1.93 ± 0.57      | 1.91 ± 0.52       | 3.5  |
| HDL-cholesterol, g/L, mean±SD                          | 0.54 ± 0.20      | 0.53 ± 0.14       | 2.0  |
| LDL-cholesterol, g/L, mean±SD                          | 1.14 ± 0.48      | 1.13 ± 0.45       | 3.3  |
| Glycated hemoglobin, %, median (IQR)                   | 6.0 (5.7-6.4)    | 5.9 (5.7-6.3)     | 3.5  |
| Hemoglobin, g/dL, median (IQR)                         | 13.4 (12.4-14.6) | 13.5 (12.4-14.2)  | 7.5  |
| Leukocytes, /mm <sup>3</sup> , median (IQR)            | 8473 (6919-9884) | 8276 (6590-10597) | 1.9  |
| Neutrophils, /mm <sup>3</sup> , median (IQR)           | 5.7 (4.3-7.6)    | 5.7 (4.1-8.2)     | 4.0  |
| Platelets, 1000/mm <sup>3</sup> , median (IQR)         | 240 (206-277)    | 236 (198-274)     | 9.9  |
| Prothrombin index, %, median (IQR)                     | 95 (86-100)      | 92 (84-100)       | 14.8 |
| Activated partial thromboplastin time, s, median (IQR) | 32 (29-36)       | 31 (28-36)        | 8.5  |
| C-reactive protein, mg/L, median (IQR)                 | 5.7 (2.5-9.6)    | 5.8 (2.6-9.7)     | 4.2  |
| Aspartate aminotransferase, U/L, median (IQR)          | 23 (19-27)       | 23 (20-28)        | 6.4  |
| Alanine aminotransferase, U/L, median (IQR)            | 18 (14-24)       | 18 (14-23)        | 5.7  |

Data are expressed as number (%) unless otherwise indicated. Descriptive parameters and ASD were calculated after handling missing baseline data including in propensity-score calculation by multiple imputation procedure (m=20 imputed datasets). \* mean numbers of matched pairs among the 20-imputed datasets.

Abbreviations: ACE=angiotensin converting enzyme, ASD=absolute standardized difference, BMI= body mass index, HDL= high density lipoprotein, IQR=interquartile range, LDL=low density lipoprotein, NIHSS= National Institutes of Health Stroke Scale, SD=standard deviation, TIA=transient ischemic attack.

**Supplemental table 3. Main baseline characteristics of patients loss and not loss at 90-day**

|                                  | 90-day follow-up |             |
|----------------------------------|------------------|-------------|
|                                  | Yes (n=316)      | No (n=20)   |
| Number of patients               | 316              | 20          |
| Benzodiazepine use               | 58 (18.3)        | 4 (20.0)    |
| Age, y, mean±SD                  | 66.6 ± 14.9      | 71.5 ± 12.9 |
| Men                              | 170 (53.8)       | 10 (50.0)   |
| Medical history                  |                  |             |
| Previous stroke                  | 32 (10.1)        | 3 (15.8)    |
| Previous TIA                     | 24 (7.6)         | 1 (5.0)     |
| Coronary artery disease          | 63 (19.9)        | 6 (30.0)    |
| Sleep apnea syndrome             | 9 (2.9)          | 0 (0.0)     |
| Heart rhythm disorders           | 75 (23.8)        | 4 (20.0)    |
| Vascular risk factors            |                  |             |
| Arterial hypertension            | 190 (60.1)       | 13 (65.0)   |
| Diabetes mellitus                | 61 (19.3)        | 5 (25.0)    |
| Hypercholesterolemia             | 149 (47.1)       | 9 (45.0)    |
| Hypertriglyceridemia             | 51 (16.1)        | 1 (5.0)     |
| Smoking                          | 94 (19.7)        | 8 (40.0)    |
| Chronic ethanol consumption      | 49 (15.6)        | 3 (15.0)    |
| BMI, kg/m <sup>2</sup> , mean±SD | 26.8 ± 5.0       | 25.5 ± 3.9  |

Data are expressed as number (%) unless otherwise indicated.

Abbreviations: BMI= body mass index, SD=standard deviation, TIA=transient ischemic attack.

1  
2  
3  
4  
5  
6  
7  
8  
9  
10  
11  
12  
13  
14  
15  
16  
17  
18  
19  
20  
21  
22  
23  
24  
25  
26  
27  
28  
29  
30  
31  
32  
33  
34  
35  
36  
37  
38  
39  
40  
41  
42  
43  
44  
45  
46

**Supplemental table 4. Individual characteristics of the 36 mortality cases during the 90-day follow-up period after stroke onset.**

| Patients | Benzodiazepines | Age | Gender | NHSS | Hypertension | Diabetes | Hypercholesterolemia | Smoking | Previous Stroke |
|----------|-----------------|-----|--------|------|--------------|----------|----------------------|---------|-----------------|
| 1        | No              | 87  | Women  | 22   | Yes          | Yes      | No                   | No      | No              |
| 2        | No              | 52  | Women  | 6    | Yes          | No       | Yes                  | Yes     | Yes             |
| 3        | No              | 39  | Women  | 15   | Yes          | No       | No                   | Yes     | No              |
| 4        | No              | 80  | Men    | 11   | Yes          | Yes      | Yes                  | Yes     | Yes             |
| 5        | No              | 72  | Men    | 10   | No           | No       | No                   | Yes     | No              |
| 6        | No              | 82  | Men    | 20   | No           | No       | No                   | No      | No              |
| 7        | No              | 82  | Women  | 21   | No           | Yes      | No                   | No      | No              |
| 8        | No              | 85  | Women  | 22   | Yes          | No       | No                   | No      | Yes             |
| 9        | No              | 89  | Women  | 26   | No           | No       | No                   | No      | No              |
| 10       | No              | 81  | Women  | 20   | Yes          | Yes      | Yes                  | No      | No              |
| 11       | No              | 71  | Men    | 8    | Yes          | Yes      | Yes                  | Yes     | No              |
| 12       | No              | 63  | Men    | 19   | Yes          | No       | No                   | No      | No              |
| 13       | No              | 43  | Women  | 11   | No           | No       | No                   | Yes     | No              |
| 14       | No              | 79  | Men    | 11   | No           | No       | No                   | No      | No              |
| 15       | No              | 44  | Women  | 7    | No           | No       | No                   | Yes     | No              |
| 16       | No              | 39  | Men    | 18   | No           | No       | No                   | No      | No              |
| 17       | No              | 38  | Men    | 0    | No           | No       | No                   | Yes     | No              |
| 18       | No              | 65  | Men    | 19   | No           | No       | No                   | Yes     | No              |
| 19       | No              | 46  | Men    | 8    | Yes          | No       | Yes                  | Yes     | No              |
| 20       | No              | 70  | Women  | 8    | Yes          | Yes      | Yes                  | No      | No              |
| 21       | No              | 48  | Women  | 17   | Yes          | No       | No                   | No      | No              |
| 22       | Yes             | 85  | Men    | 21   | No           | No       | No                   | No      | No              |
| 23       | Yes             | 53  | Men    | 27   | No           | No       | No                   | Yes     | No              |
| 24       | Yes             | 84  | Women  | 32   | Yes          | No       | Yes                  | No      | Yes             |
| 25       | Yes             | 84  | Men    | 22   | Yes          | No       | Yes                  | No      | No              |
| 26       | Yes             | 85  | Women  | 27   | Yes          | No       | Yes                  | No      | No              |
| 27       | Yes             | 93  | Women  | 21   | Yes          | No       | Yes                  | No      | No              |
| 28       | Yes             | 60  | Men    | 1    | Yes          | No       | Yes                  | No      | No              |
| 29       | Yes             | 86  | Women  | 25   | Yes          | No       | Yes                  | No      | No              |
| 30       | Yes             | 76  | Women  | 20   | Yes          | Yes      | No                   | No      | No              |
| 31       | Yes             | 66  | Women  | 17   | Yes          | No       | No                   | No      | No              |
| 32       | Yes             | 71  | Women  | 13   | Yes          | No       | Yes                  | No      | No              |
| 33       | Yes             | 83  | Women  | 1    | Yes          | No       | Yes                  | No      | No              |
| 34       | Yes             | 81  | Men    | 1    | No           | No       | Yes                  | No      | Yes             |
| 35       | Yes             | 83  | Women  | 11   | Yes          | No       | Yes                  | Yes     | No              |
| 36       | Yes             | 63  | Women  | 0    | Yes          | No       | No                   | No      | No              |

**Supplemental table 5. Main baseline characteristics of alive patients with and without missing MMSE at 8- and 90-days**

|                                  | 8-day MMSE  |             | 90-day MMSE |             |
|----------------------------------|-------------|-------------|-------------|-------------|
|                                  | Not missing | Missing     | Not missing | Missing     |
| Number of patients               | 236         | 89          | 229         | 71          |
| Benzodiazepine use               | 40 (16.9)   | 17 (19.1)   | 35 (15.3)   | 12 (16.9)   |
| Age, y, mean±SD                  | 65.2 ± 14.4 | 70.3 ± 15.2 | 65.5 ± 14.9 | 69.8 ± 13.3 |
| Men                              | 132 (55.9)  | 45 (50.6)   | 128 (55.9)  | 37 (52.1)   |
| Medical history                  |             |             |             |             |
| Previous stroke                  | 22 (9.3)    | 10 (11.4)   | 22 (9.6)    | 8 (11.4)    |
| Previous TIA                     | 16 (6.8)    | 9 (10.1)    | 14 (6.1)    | 7 (9.9)     |
| Coronary artery disease          | 40 (16.9)   | 26 (29.2)   | 44 (19.2)   | 14 (19.7)   |
| Sleep apnea syndrome             | 6 (2.6)     | 3 (3.4)     | 4 (1.8)     | 4 (5.7)     |
| Heart rhythm disorders           | 51 (21.6)   | 24 (27.3)   | 52 (22.8)   | 19 (26.8)   |
| Vascular risk factors            |             |             |             |             |
| Arterial hypertension            | 137 (58.0)  | 57 (64.0)   | 138 (60.3)  | 42 (59.1)   |
| Diabetes mellitus                | 44 (18.6)   | 19 (21.3)   | 47 (20.5)   | 12 (16.9)   |
| Hypercholesterolemia             | 107 (45.3)  | 47 (52.8)   | 111 (48.5)  | 31 (43.7)   |
| Hypertriglyceridemia             | 41 (17.4)   | 10 (11.2)   | 40 (17.5)   | 8 (11.3)    |
| Smoking                          | 81 (34.3)   | 18 (20.2)   | 67 (29.3)   | 23 (32.4)   |
| Chronic ethanol consumption      | 39 (16.7)   | 13 (14.6)   | 38 (16.6)   | 13 (18.6)   |
| BMI, kg/m <sup>2</sup> , mean±SD | 26.7 ± 4.8  | 27.0 ± 5.1  | 26.8 ± 4.8  | 26.6 ± 5.0  |

Data are expressed as number (%) unless otherwise indicated.

Abbreviations: BMI= body mass index, SD=standard deviation, TIA=transient ischemic attack.

## STROBE Statement—checklist of items that should be included in reports of observational studies

|                              | Item No | Recommendation                                                                                                                                                                                                                                                                                                                                                                                                                                                                        |
|------------------------------|---------|---------------------------------------------------------------------------------------------------------------------------------------------------------------------------------------------------------------------------------------------------------------------------------------------------------------------------------------------------------------------------------------------------------------------------------------------------------------------------------------|
| <b>Title and abstract</b>    | 1       | (a) Indicate the study's design with a commonly used term in the title or the abstract <a href="#">Page 2</a><br>(b) Provide in the abstract an informative and balanced summary of what was done and what was found ( <a href="#">Page 2</a> )                                                                                                                                                                                                                                       |
| <b>Introduction</b>          |         |                                                                                                                                                                                                                                                                                                                                                                                                                                                                                       |
| Background/rationale         | 2       | Explain the scientific background and rationale for the investigation being reported <a href="#">Page 4</a>                                                                                                                                                                                                                                                                                                                                                                           |
| Objectives                   | 3       | State specific objectives, including any prespecified hypotheses <a href="#">Page 4</a>                                                                                                                                                                                                                                                                                                                                                                                               |
| <b>Methods</b>               |         |                                                                                                                                                                                                                                                                                                                                                                                                                                                                                       |
| Study design                 | 4       | Present key elements of study design early in the paper ( <a href="#">page 5</a> )                                                                                                                                                                                                                                                                                                                                                                                                    |
| Setting                      | 5       | Describe the setting, locations, and relevant dates, including periods of recruitment, exposure, follow-up, and data collection ( <a href="#">page 5</a> )                                                                                                                                                                                                                                                                                                                            |
| Participants                 | 6       | <i>Cohort study</i> —Give the eligibility criteria, and the sources and methods of selection of participants. Describe methods of follow-up ( <a href="#">page 5</a> )<br>(b) <i>Cohort study</i> —For matched studies, give matching criteria and number of exposed and unexposed (NA)                                                                                                                                                                                               |
| Variables                    | 7       | Clearly define all outcomes, exposures, predictors, potential confounders, and effect modifiers. Give diagnostic criteria, if applicable ( <a href="#">page 5</a> )                                                                                                                                                                                                                                                                                                                   |
| Data sources/<br>measurement | 8*      | For each variable of interest, give sources of data and details of methods of assessment (measurement). Describe comparability of assessment methods if there is more than one group ( <a href="#">page 5-6</a> )                                                                                                                                                                                                                                                                     |
| Bias                         | 9       | Describe any efforts to address potential sources of bias (NA)                                                                                                                                                                                                                                                                                                                                                                                                                        |
| Study size                   | 10      | Explain how the study size was arrived ( <a href="#">page 5</a> )                                                                                                                                                                                                                                                                                                                                                                                                                     |
| Quantitative variables       | 11      | Explain how quantitative variables were handled in the analyses. If applicable, describe which groupings were chosen and why ( <a href="#">page 6</a> )                                                                                                                                                                                                                                                                                                                               |
| Statistical methods          | 12      | (a) Describe all statistical methods, including those used to control for confounding ( <a href="#">page 6</a> )<br>(b) Describe any methods used to examine subgroups and interactions ( <a href="#">page 6</a> )<br>(c) Explain how missing data were addressed ( <a href="#">pages 6-7</a> )<br>(d) <i>Cohort study</i> —If applicable, explain how loss to follow-up was addressed ( <a href="#">page 6</a> )<br>(e) Describe any sensitivity analyses ( <a href="#">page 6</a> ) |

Continued on next page

**Results**

|                  |     |                                                                                                                                                                                                                                                                                                                                                                                                                                                                                        |
|------------------|-----|----------------------------------------------------------------------------------------------------------------------------------------------------------------------------------------------------------------------------------------------------------------------------------------------------------------------------------------------------------------------------------------------------------------------------------------------------------------------------------------|
| Participants     | 13* | (a) Report numbers of individuals at each stage of study—eg numbers potentially eligible, examined for eligibility, confirmed eligible, included in the study, completing follow-up, and analysed ( <a href="#">page 8</a> )<br>(b) Give reasons for non-participation at each stage ( <a href="#">page 8</a> )<br>(c) Consider use of a flow diagram (NA)                                                                                                                             |
| Descriptive data | 14* | (a) Give characteristics of study participants (eg demographic, clinical, social) and information on exposures and potential confounders ( <a href="#">page 8; 15-16</a> )<br>(b) Indicate number of participants with missing data for each variable of interest ( <a href="#">page 8; 15-16</a> )<br>(c) <i>Cohort study</i> —Summarise follow-up time (eg, average and total amount) ( <a href="#">page 8; 15-16</a> )                                                              |
| Outcome data     | 15* | <i>Cohort study</i> —Report numbers of outcome events or summary measures over time ( <a href="#">page 8;17</a> )                                                                                                                                                                                                                                                                                                                                                                      |
| Main results     | 16  | (a) Give unadjusted estimates and, if applicable, confounder-adjusted estimates and their precision (eg, 95% confidence interval). Make clear which confounders were adjusted for and why they were included ( <a href="#">page 8; 15-17</a> )<br>(b) Report category boundaries when continuous variables were categorized ( <a href="#">page 8; 15-17</a> )<br>(c) If relevant, consider translating estimates of relative risk into absolute risk for a meaningful time period (NA) |
| Other analyses   | 17  | Report other analyses done—eg analyses of subgroups and interactions, and sensitivity analyses ( <a href="#">suppl file</a> )                                                                                                                                                                                                                                                                                                                                                          |

**Discussion**

|                  |    |                                                                                                                                                                                                        |
|------------------|----|--------------------------------------------------------------------------------------------------------------------------------------------------------------------------------------------------------|
| Key results      | 18 | Summarise key results with reference to study objectives ( <a href="#">page 10</a> )                                                                                                                   |
| Limitations      | 19 | Discuss limitations of the study, taking into account sources of potential bias or imprecision. Discuss both direction and magnitude of any potential bias ( <a href="#">page 10-12</a> )              |
| Interpretation   | 20 | Give a cautious overall interpretation of results considering objectives, limitations, multiplicity of analyses, results from similar studies, and other relevant evidence ( <a href="#">page 13</a> ) |
| Generalisability | 21 | Discuss the generalisability (external validity) of the study results ( <a href="#">pages 13-14</a> )                                                                                                  |

**Other information**

|         |    |                                                                                                                                                                                           |
|---------|----|-------------------------------------------------------------------------------------------------------------------------------------------------------------------------------------------|
| Funding | 22 | Give the source of funding and the role of the funders for the present study and, if applicable, for the original study on which the present article is based ( <a href="#">page 18</a> ) |
|---------|----|-------------------------------------------------------------------------------------------------------------------------------------------------------------------------------------------|

\*Give information separately for cases and controls in case-control studies and, if applicable, for exposed and unexposed groups in cohort and cross-sectional studies.

**Note:** An Explanation and Elaboration article discusses each checklist item and gives methodological background and published examples of transparent reporting. The STROBE checklist is best used in conjunction with this article (freely available on the Web sites of PLoS Medicine at <http://www.plosmedicine.org/>, Annals of Internal Medicine at <http://www.annals.org/>, and Epidemiology at <http://www.epidem.com/>). Information on the STROBE Initiative is available at [www.strobe-statement.org](http://www.strobe-statement.org).
