# Supplementary material for: Preadmission use of benzodiazepines and stroke outcomes: the Biostroke prospective cohort study
Source: PubMed Central journal article supplement — BMJ Open. 2019 Jan 15;9(1):e022720. doi: 10.1136/bmjopen-2018-022720 (PMC6340422; doi:10.1136/bmjopen-2018-022720), 2019-01-15
Supplement: bmjopen-2018-022720supp001.pdf [file bmjopen-2018-022720supp001.pdf]

**ONLINE SUPPLEMENT.****Supplemental table 1. Main baseline characteristics and Outcomes of Overall Study population (N=336)**

|                                    | <b>N</b> | <b>Value</b> |
|------------------------------------|----------|--------------|
| <b>Demographic characteristics</b> |          |              |
| Age, y, mean±SD                    | 336      | 66.9 ± 14.9  |
| Men                                | 336      | 180 (53.6)   |
| <b>Medical history</b>             |          |              |
| Previous stroke                    | 335      | 35 (10.5)    |
| Previous TIA                       | 336      | 25 (7.4)     |
| Coronary artery disease            | 336      | 69 (20.5)    |
| Sleep apnea syndrome               | 333      | 9 (2.7)      |
| Heart rhythm disorders             | 335      | 79 (23.6)    |
| <b>Vascular risk factors</b>       |          |              |
| Arterial hypertension              | 336      | 203 (60.4)   |
| Diabetes mellitus                  | 336      | 66 (19.6)    |
| Hypercholesterolemia               | 336      | 158 (47.0)   |
| Hypertriglyceridemia               | 336      | 52 (15.5)    |
| Smoking                            | 336      | 102 (30.4)   |
| Chronic ethanol consumption        | 334      | 52 (15.6)    |
| BMI, kg/m <sup>2</sup> , mean±SD   | 312      | 26.8 ± 4.9   |
| <b>Routine drugs</b>               |          |              |
| Fibrates                           | 336      | 23 (6.9)     |
| Statins                            | 336      | 107 (31.9)   |
| Oral anticoagulants                | 336      | 19 (5.7)     |
| Antiplatelet                       | 336      | 126 (37.5)   |
| ACE                                | 336      | 63 (18.8)    |
| Angiotensin II receptor antagonist | 336      | 56 (16.7)    |
| Diuretics                          | 336      | 86 (25.6)    |

|                                                        |     |                   |
|--------------------------------------------------------|-----|-------------------|
| Calcium channel blockers                               | 336 | 53 (15.8)         |
| Betablockers                                           | 335 | 127 (37.9)        |
| Oral hypoglycemic                                      | 336 | 51 (15.2)         |
| Intravenous thrombolysis                               | 332 | 94 (28.3)         |
| Onset to admission time, hours, median (IQR)           | 332 | 2 (1-7)           |
| NIHSS, median (IQR)                                    | 336 | 6 (2-14)          |
| <b>Biological characteristics</b>                      |     |                   |
| Triglycerides, g/L, median (IQR)                       | 329 | 1.1 (0.8-1.6)     |
| Total cholesterol, g/L, mean±SD                        | 329 | 1.95 ± 0.50       |
| HDL-cholesterol, g/L, mean±SD                          | 321 | 0.53 ± 0.16       |
| LDL-cholesterol, g/L, mean±SD                          | 319 | 1.16 ± 0.41       |
| Glycated hemoglobin, %, median (IQR)                   | 245 | 5.9 (5.6-6.4)     |
| Hemoglobin, g/dL, median (IQR)                         | 335 | 13.7 (12.9-14.7)  |
| Leukocytes, /mm <sup>3</sup> , median (IQR)            | 334 | 8320 (6730-10130) |
| Neutrophils, /mm <sup>3</sup> , median (IQR)           | 315 | 5.6 (4.2-7.5)     |
| Platelets, 1000/mm <sup>3</sup> , median (IQR)         | 335 | 235 (195-272)     |
| Prothrombin index, %, median (IQR)                     | 320 | 95 (86-100)       |
| Activated partial thromboplastin time, s, median (IQR) | 333 | 32 (29-35)        |
| C-reactive protein, mg/L, median (IQR)                 | 280 | 4.9 (2-9.7)       |
| Aspartate aminotransferase, U/L, median (IQR)          | 321 | 23 (19-28)        |
| Alanine aminotransferase, U/L, median (IQR)            | 322 | 20 (15-28)        |
| <b>Outcome at 8-day</b>                                |     |                   |
| All-cause death                                        | 336 | 11 (3.3)          |
| NIHSS ≥6                                               | 319 | 108 (33.9)        |
| Poor outcome (mRS ≥2)                                  | 330 | 176 (53.3)        |
| Poor outcome (Barthel <95)                             | 321 | 154 (48.0)        |
| Cognitive impairment (MMSE <24)                        | 236 | 63 (26.7)         |
| <b>Outcome at 90-day</b>                               |     |                   |
| All-cause death                                        | 316 | 36 (11.4)         |
| Poor outcome (mRS ≥2)                                  | 316 | 145 (45.9)        |

---

|                                 |     |           |
|---------------------------------|-----|-----------|
| Poor outcome (Barthel <95)      | 278 | 88 (31.7) |
| Cognitive impairment (MMSE <24) | 229 | 31 (13.5) |

---

Abbreviations: ACE=angiotensin converting enzyme, ASD=absolute standardized difference, BMI= body mass index, HDL= high density lipoprotein, IQR=interquartile range, LDL=low density lipoprotein, MMSE: Mini Mental State Examination, mRS: modified Rankin score, NIHSS= National Institutes of Health Stroke Scale, SD=standard deviation, TIA=transient ischemic attack

**Supplemental Table 2. Baseline characteristics in benzodiazepine users and non-users after propensity-score matching.**

|                                    | <b>Benzodiazepine<br/>non-users (n=56) *</b> | <b>Benzodiazepine<br/>users (n=56) *</b> | <i>ASD, %</i> |
|------------------------------------|----------------------------------------------|------------------------------------------|---------------|
| <b>Demographic characteristics</b> |                                              |                                          |               |
| Age, y, mean±SD                    | 72.6 ± 14.9                                  | 72.6 ± 12.6                              | 0.2           |
| Men                                | 24 (42.6)                                    | 23 (40.4)                                | 4.5           |
| <b>Medical history</b>             |                                              |                                          |               |
| Previous stroke                    | 6 (9.9)                                      | 5 (9.7)                                  | 0.1           |
| Previous TIA                       | 5 (8.1)                                      | 4 (7.2)                                  | 2.6           |
| Coronary artery disease            | 13 (23.7)                                    | 14 (24.6)                                | 2.4           |
| Sleep apnea syndrome               | 2 (4.2)                                      | 2 (3.6)                                  | 2.5           |
| Heart rhythm disorders             | 16 (29.3)                                    | 16 (29.3)                                | 0.2           |
| <b>Vascular risk factors</b>       |                                              |                                          |               |
| Arterial hypertension              | 43 (77.1)                                    | 43 (76.8)                                | 0.8           |
| Diabetes mellitus                  | 7 (13.2)                                     | 7 (12.3)                                 | 5.7           |
| Hypercholesterolemia               | 30 (54.0)                                    | 29 (52.3)                                | 3.3           |
| Hypertriglyceridemia               | 9 (16.5)                                     | 9 (16.8)                                 | 1.0           |
| Smoking                            | 13 (23.3)                                    | 12 (21.9)                                | 2.7           |
| Chronic ethanol consumption        | 9 (15.6)                                     | 7 (13.0)                                 | 6.7           |
| BMI, kg/m <sup>2</sup> , mean±SD   | 26.2 ± 5.7                                   | 25.9 ± 5.3                               | 6.0           |
| <b>Routine drugs</b>               |                                              |                                          |               |
| Fibrates                           | 6 (10.8)                                     | 6 (10.7)                                 | 0.2           |
| Statins                            | 19 (34.6)                                    | 18 (31.7)                                | 6.0           |
| Oral anticoagulants                | 19 (34.6)                                    | 18 (31.7)                                | 3.1           |
| Antiplatelet                       | 24 (43.1)                                    | 24 (42.6)                                | 1.1           |
| ACE                                | 15 (26.3)                                    | 14 (24.5)                                | 4.0           |
| Angiotensin II receptor antagonist | 9 (16.9)                                     | 10 (17.4)                                | 1.5           |
| Diuretics                          | 18 (31.9)                                    | 20 (35.4)                                | 7.7           |

|                                                        |                  |                   |      |
|--------------------------------------------------------|------------------|-------------------|------|
| Calcium channel blockers                               | 10 (18.0)        | 10 (17.6)         | 1.0  |
| Betablockers                                           | 26 (46.0)        | 26 (45.8)         | 0.5  |
| Oral hypoglycemic                                      | 6 (11.5)         | 6 (10.6)          | 2.4  |
| Intravenous thrombolysis                               | 16 (27.8)        | 15 (27.0)         | 1.6  |
| Onset to admission time, hours, median (IQR)           | 2 (1-8)          | 2 (1-3)           | 22.0 |
| NIHSS, median (IQR)                                    | 8 (2-17)         | 6 (2-18)          | 6.7  |
| <b>Biological characteristics</b>                      |                  |                   |      |
| Triglycerides, g/L, median (IQR)                       | 1.02 (0.81-1.54) | 1.02 (0.82-1.58)  | 3.6  |
| Total cholesterol, g/L, mean±SD                        | 1.93 ± 0.57      | 1.91 ± 0.52       | 3.5  |
| HDL-cholesterol, g/L, mean±SD                          | 0.54 ± 0.20      | 0.53 ± 0.14       | 2.0  |
| LDL-cholesterol, g/L, mean±SD                          | 1.14 ± 0.48      | 1.13 ± 0.45       | 3.3  |
| Glycated hemoglobin, %, median (IQR)                   | 6.0 (5.7-6.4)    | 5.9 (5.7-6.3)     | 3.5  |
| Hemoglobin, g/dL, median (IQR)                         | 13.4 (12.4-14.6) | 13.5 (12.4-14.2)  | 7.5  |
| Leukocytes, /mm <sup>3</sup> , median (IQR)            | 8473 (6919-9884) | 8276 (6590-10597) | 1.9  |
| Neutrophils, /mm <sup>3</sup> , median (IQR)           | 5.7 (4.3-7.6)    | 5.7 (4.1-8.2)     | 4.0  |
| Platelets, 1000/mm <sup>3</sup> , median (IQR)         | 240 (206-277)    | 236 (198-274)     | 9.9  |
| Prothrombin index, %, median (IQR)                     | 95 (86-100)      | 92 (84-100)       | 14.8 |
| Activated partial thromboplastin time, s, median (IQR) | 32 (29-36)       | 31 (28-36)        | 8.5  |
| C-reactive protein, mg/L, median (IQR)                 | 5.7 (2.5-9.6)    | 5.8 (2.6-9.7)     | 4.2  |
| Aspartate aminotransferase, U/L, median (IQR)          | 23 (19-27)       | 23 (20-28)        | 6.4  |
| Alanine aminotransferase, U/L, median (IQR)            | 18 (14-24)       | 18 (14-23)        | 5.7  |

Data are expressed as number (%) unless otherwise indicated. Descriptive parameters and ASD were calculated after handling missing baseline data including in propensity-score calculation by multiple imputation procedure (m=20 imputed datasets). \* mean numbers of matched pairs among the 20-imputed datasets.

Abbreviations: ACE=angiotensin converting enzyme, ASD=absolute standardized difference, BMI= body mass index, HDL= high density lipoprotein, IQR=interquartile range, LDL=low density lipoprotein, NIHSS= National Institutes of Health Stroke Scale, SD=standard deviation, TIA=transient ischemic attack.

**Supplemental table 3. Main baseline characteristics of patients loss and not loss at 90-day**

|                                  | 90-day follow-up |             |
|----------------------------------|------------------|-------------|
|                                  | Yes (n=316)      | No (n=20)   |
| Number of patients               | 316              | 20          |
| Benzodiazepine use               | 58 (18.3)        | 4 (20.0)    |
| Age, y, mean±SD                  | 66.6 ± 14.9      | 71.5 ± 12.9 |
| Men                              | 170 (53.8)       | 10 (50.0)   |
| Medical history                  |                  |             |
| Previous stroke                  | 32 (10.1)        | 3 (15.8)    |
| Previous TIA                     | 24 (7.6)         | 1 (5.0)     |
| Coronary artery disease          | 63 (19.9)        | 6 (30.0)    |
| Sleep apnea syndrome             | 9 (2.9)          | 0 (0.0)     |
| Heart rhythm disorders           | 75 (23.8)        | 4 (20.0)    |
| Vascular risk factors            |                  |             |
| Arterial hypertension            | 190 (60.1)       | 13 (65.0)   |
| Diabetes mellitus                | 61 (19.3)        | 5 (25.0)    |
| Hypercholesterolemia             | 149 (47.1)       | 9 (45.0)    |
| Hypertriglyceridemia             | 51 (16.1)        | 1 (5.0)     |
| Smoking                          | 94 (19.7)        | 8 (40.0)    |
| Chronic ethanol consumption      | 49 (15.6)        | 3 (15.0)    |
| BMI, kg/m <sup>2</sup> , mean±SD | 26.8 ± 5.0       | 25.5 ± 3.9  |

Data are expressed as number (%) unless otherwise indicated.

Abbreviations: BMI= body mass index, SD=standard deviation, TIA=transient ischemic attack.

**Supplemental table 4. Individual characteristics of the 36 mortality cases during the 90-day follow-up period after stroke onset.**

| Patients | Benzodiazepines | Age | Gender | NHSS | Hypertension | Diabetes | Hypercholesterolemia | Smoking | Previous Stroke |
|----------|-----------------|-----|--------|------|--------------|----------|----------------------|---------|-----------------|
| 1        | No              | 87  | Women  | 22   | Yes          | Yes      | No                   | No      | No              |
| 2        | No              | 52  | Women  | 6    | Yes          | No       | Yes                  | Yes     | Yes             |
| 3        | No              | 39  | Women  | 15   | Yes          | No       | No                   | Yes     | No              |
| 4        | No              | 80  | Men    | 11   | Yes          | Yes      | Yes                  | Yes     | Yes             |
| 5        | No              | 72  | Men    | 10   | No           | No       | No                   | Yes     | No              |
| 6        | No              | 82  | Men    | 20   | No           | No       | No                   | No      | No              |
| 7        | No              | 82  | Women  | 21   | No           | Yes      | No                   | No      | No              |
| 8        | No              | 85  | Women  | 22   | Yes          | No       | No                   | No      | Yes             |
| 9        | No              | 89  | Women  | 26   | No           | No       | No                   | No      | No              |
| 10       | No              | 81  | Women  | 20   | Yes          | Yes      | Yes                  | No      | No              |
| 11       | No              | 71  | Men    | 8    | Yes          | Yes      | Yes                  | Yes     | No              |
| 12       | No              | 63  | Men    | 19   | Yes          | No       | No                   | No      | No              |
| 13       | No              | 43  | Women  | 11   | No           | No       | No                   | Yes     | No              |
| 14       | No              | 79  | Men    | 11   | No           | No       | No                   | No      | No              |
| 15       | No              | 44  | Women  | 7    | No           | No       | No                   | Yes     | No              |
| 16       | No              | 39  | Men    | 18   | No           | No       | No                   | No      | No              |
| 17       | No              | 38  | Men    | 0    | No           | No       | No                   | Yes     | No              |
| 18       | No              | 65  | Men    | 19   | No           | No       | No                   | Yes     | No              |
| 19       | No              | 46  | Men    | 8    | Yes          | No       | Yes                  | Yes     | No              |
| 20       | No              | 70  | Women  | 8    | Yes          | Yes      | Yes                  | No      | No              |
| 21       | No              | 48  | Women  | 17   | Yes          | No       | No                   | No      | No              |
| 22       | Yes             | 85  | Men    | 21   | No           | No       | No                   | No      | No              |
| 23       | Yes             | 53  | Men    | 27   | No           | No       | No                   | Yes     | No              |
| 24       | Yes             | 84  | Women  | 32   | Yes          | No       | Yes                  | No      | Yes             |
| 25       | Yes             | 84  | Men    | 22   | Yes          | No       | Yes                  | No      | No              |
| 26       | Yes             | 85  | Women  | 27   | Yes          | No       | Yes                  | No      | No              |
| 27       | Yes             | 93  | Women  | 21   | Yes          | No       | Yes                  | No      | No              |
| 28       | Yes             | 60  | Men    | 1    | Yes          | No       | Yes                  | No      | No              |
| 29       | Yes             | 86  | Women  | 25   | Yes          | No       | Yes                  | No      | No              |
| 30       | Yes             | 76  | Women  | 20   | Yes          | Yes      | No                   | No      | No              |
| 31       | Yes             | 66  | Women  | 17   | Yes          | No       | No                   | No      | No              |
| 32       | Yes             | 71  | Women  | 13   | Yes          | No       | Yes                  | No      | No              |
| 33       | Yes             | 83  | Women  | 1    | Yes          | No       | Yes                  | No      | No              |
| 34       | Yes             | 81  | Men    | 1    | No           | No       | Yes                  | No      | Yes             |
| 35       | Yes             | 83  | Women  | 11   | Yes          | No       | Yes                  | Yes     | No              |
| 36       | Yes             | 63  | Women  | 0    | Yes          | No       | No                   | No      | No              |

**Supplemental table 5. Main baseline characteristics of alive patients with and without missing MMSE at 8- and 90-days**

|                                  | 8-day MMSE  |             | 90-day MMSE |             |
|----------------------------------|-------------|-------------|-------------|-------------|
|                                  | Not missing | Missing     | Not missing | Missing     |
| Number of patients               | 236         | 89          | 229         | 71          |
| Benzodiazepine use               | 40 (16.9)   | 17 (19.1)   | 35 (15.3)   | 12 (16.9)   |
| Age, y, mean±SD                  | 65.2 ± 14.4 | 70.3 ± 15.2 | 65.5 ± 14.9 | 69.8 ± 13.3 |
| Men                              | 132 (55.9)  | 45 (50.6)   | 128 (55.9)  | 37 (52.1)   |
| Medical history                  |             |             |             |             |
| Previous stroke                  | 22 (9.3)    | 10 (11.4)   | 22 (9.6)    | 8 (11.4)    |
| Previous TIA                     | 16 (6.8)    | 9 (10.1)    | 14 (6.1)    | 7 (9.9)     |
| Coronary artery disease          | 40 (16.9)   | 26 (29.2)   | 44 (19.2)   | 14 (19.7)   |
| Sleep apnea syndrome             | 6 (2.6)     | 3 (3.4)     | 4 (1.8)     | 4 (5.7)     |
| Heart rhythm disorders           | 51 (21.6)   | 24 (27.3)   | 52 (22.8)   | 19 (26.8)   |
| Vascular risk factors            |             |             |             |             |
| Arterial hypertension            | 137 (58.0)  | 57 (64.0)   | 138 (60.3)  | 42 (59.1)   |
| Diabetes mellitus                | 44 (18.6)   | 19 (21.3)   | 47 (20.5)   | 12 (16.9)   |
| Hypercholesterolemia             | 107 (45.3)  | 47 (52.8)   | 111 (48.5)  | 31 (43.7)   |
| Hypertriglyceridemia             | 41 (17.4)   | 10 (11.2)   | 40 (17.5)   | 8 (11.3)    |
| Smoking                          | 81 (34.3)   | 18 (20.2)   | 67 (29.3)   | 23 (32.4)   |
| Chronic ethanol consumption      | 39 (16.7)   | 13 (14.6)   | 38 (16.6)   | 13 (18.6)   |
| BMI, kg/m <sup>2</sup> , mean±SD | 26.7 ± 4.8  | 27.0 ± 5.1  | 26.8 ± 4.8  | 26.6 ± 5.0  |

Data are expressed as number (%) unless otherwise indicated.

Abbreviations: BMI= body mass index, SD=standard deviation, TIA=transient ischemic attack.
